# Supplementary material for: Wnt- and glutamate-receptors orchestrate stem cell dynamics and asymmetric cell division
Source: eLife. 2021 May 24;10:e59791. doi: 10.7554/eLife.59791 (PMC8177892; doi:10.7554/eLife.59791)
Supplement: Figure 1—source data 1. [file elife-59791-fig1-data1.xlsx]

## Sheet: Figure 1
Panel C
Condition	CNTRL						Average	Wnt3a (200 ng/mL)						Average		Two-way ANOVA	Ordinary						Number of families	2
WT	1.54	2.25	1.49	3.57	3.52	4.05	2.73667	54.8	50.6	56.4	43.6	43.3	45.7	49.0667		Alpha	0.05						Number of comparisons per family	4
Lrp5KO	0.15	0.13	0.17				0.15	26.1	27.2	27.6				26.9667									Alpha	0.05
Lrp6KO	0.48	0.48	0.52				0.493333	5.47	5.11	6.24				5.60667		Source of Variation	% of total variation	P value	P value summary	Significant?
Lrp5/6KO	0.073	0.13	0.098				0.100333	0.16	0.1	0.15				0.136667		Interaction	30.45	<0.0001	****	Yes			Dunnett's multiple comparisons test	Predicted (LS) mean diff.	95.00% CI of diff.	Below threshold?	Summary	Adjusted P Value		Test details	Predicted (LS) mean 1	Predicted (LS) mean 2	Predicted (LS) mean diff.	SE of diff.	N1	N2	q	DF
βKO	1.27	0.18	1				0.816667	0.16	0.67	0.16				0.33		Row Factor	36.46	<0.0001	****	Yes
Representative examples shown in Panel B																Column Factor	16.59	<0.0001	****	Yes			CNTRL							CNTRL
																							WT vs. Lrp5KO	2.587	-2.217 to 7.390	No	ns	0.4724		WT vs. Lrp5KO	2.737	0.15	2.587	1.821	6	3	1.42	26
																ANOVA table	SS (Type III)	DF	MS	F (DFn, DFd)	P value		WT vs. Lrp6KO	2.243	-2.560 to 7.047	No	ns	0.5975		WT vs. Lrp6KO	2.737	0.4933	2.243	1.821	6	3	1.232	26
																Interaction	3705	4	926.3	F (4, 26) = 139.7	P<0.0001		WT vs. Lrp5/6KO	2.636	-2.167 to 7.440	No	ns	0.4551		WT vs. Lrp5/6KO	2.737	0.1003	2.636	1.821	6	3	1.448	26
																Row Factor	4436	4	1109	F (4, 26) = 167.2	P<0.0001		WT vs. βKO	1.92	-2.884 to 6.724	No	ns	0.7172		WT vs. βKO	2.737	0.8167	1.92	1.821	6	3	1.054	26
																Column Factor	2018	1	2018	F (1, 26) = 304.3	P<0.0001
																Residual	172.4	26	6.632				Wnt3a (200 ng/mL)							Wnt3a (200 ng/mL)
																							WT vs. Lrp5KO	22.1	17.30 to 26.90	Yes	****	<0.0001		WT vs. Lrp5KO	49.07	26.97	22.1	1.821	6	3	12.14	26
																Difference between column means							WT vs. Lrp6KO	43.46	38.66 to 48.26	Yes	****	<0.0001		WT vs. Lrp6KO	49.07	5.607	43.46	1.821	6	3	23.87	26
																Predicted (LS) mean of CNTRL	0.8594						WT vs. Lrp5/6KO	48.93	44.13 to 53.73	Yes	****	<0.0001		WT vs. Lrp5/6KO	49.07	0.1367	48.93	1.821	6	3	26.87	26
																Predicted (LS) mean of Wnt3a (200 ng/mL)	16.42						WT vs. βKO	48.74	43.93 to 53.54	Yes	****	<0.0001		WT vs. βKO	49.07	0.33	48.74	1.821	6	3	26.76	26
																Difference between predicted means	-15.56
																SE of difference	0.8921
																95% CI of difference	-17.40 to -13.73
																Data summary
																Number of columns (Column Factor)	2
																Number of rows (Row Factor)	5
																Number of values	36
Panel D
	CNTRL			Geometric Mean	Wnt3a (200 ng/mL)			Geometric Mean		Two-way ANOVA	Ordinary						Number of families	2
WT	0.795704	1.00469	1.25088	1	3.43611	4.92823	3.89099	4.03899		Alpha	0.05						Number of comparisons per family	4
Lrp5KO (#2)	0.911081	1.41984	1.07278	1.11541	2.02579	3.17764	1.76332	2.24738									Alpha	0.05
Lrp6KO (#2)	0.699934	0.623882	0.308107	0.512413	1.02045	0.943937	0.947117	0.969869		Source of Variation	% of total variation	P value	P value summary	Significant?
Lrp5/6dKO (#2)	0.31141	0.58829	0.583855	0.47469	0.466555	0.62801	0.628493	0.568927		Interaction	22.41	<0.0001	****	Yes			Dunnett's multiple comparisons test	Mean Diff.	95.00% CI of diff.	Below threshold?	Summary	Adjusted P Value		Test details	Mean 1	Mean 2	Mean Diff.	SE of diff.	N1	N2	q	DF
BKO	0.056115	0.0625666	0.0861647	0.06713	0.0700604	0.102485	0.098057	0.088962		Row Factor	55.38	<0.0001	****	Yes
										Column Factor	15.94	<0.0001	****	Yes			CNTRL							CNTRL
																	WT vs. Lrp5KO (#2)	-0.1175	-0.9128 to 0.6778	No	ns	0.9845		WT vs. Lrp5KO (#2)	1.017	1.135	-0.1175	0.3	3	3	0.3916	20
										ANOVA table	SS	DF	MS	F (DFn, DFd)	P value		WT vs. Lrp6KO (#2)	0.4731	-0.3222 to 1.268	No	ns	0.3509		WT vs. Lrp6KO (#2)	1.017	0.544	0.4731	0.3	3	3	1.577	20
										Interaction	9.652	4	2.413	F (4, 20) = 17.88	P<0.0001		WT vs. Lrp5/6dKO (#2)	0.5226	-0.2727 to 1.318	No	ns	0.2717		WT vs. Lrp5/6dKO (#2)	1.017	0.4945	0.5226	0.3	3	3	1.742	20
										Row Factor	23.85	4	5.963	F (4, 20) = 44.18	P<0.0001		WT vs. BKO	0.9488	0.1535 to 1.744	Yes	*	0.0168		WT vs. BKO	1.017	0.06828	0.9488	0.3	3	3	3.163	20
										Column Factor	6.866	1	6.866	F (1, 20) = 50.87	P<0.0001
										Residual	2.7	20	0.135				Wnt3a (200 ng/mL)							Wnt3a (200 ng/mL)
																	WT vs. Lrp5KO (#2)	1.763	0.9675 to 2.558	Yes	****	<0.0001		WT vs. Lrp5KO (#2)	4.085	2.322	1.763	0.3	3	3	5.877	20
										Difference between column means							WT vs. Lrp6KO (#2)	3.115	2.319 to 3.910	Yes	****	<0.0001		WT vs. Lrp6KO (#2)	4.085	0.9705	3.115	0.3	3	3	10.38	20
										Mean of CNTRL	0.6517						WT vs. Lrp5/6dKO (#2)	3.511	2.715 to 4.306	Yes	****	<0.0001		WT vs. Lrp5/6dKO (#2)	4.085	0.5744	3.511	0.3	3	3	11.7	20
										Mean of Wnt3a (200 ng/mL)	1.608						WT vs. BKO	3.995	3.200 to 4.790	Yes	****	<0.0001		WT vs. BKO	4.085	0.0902	3.995	0.3	3	3	13.32	20
										Difference between means	-0.9568
										SE of difference	0.1342
										95% CI of difference	-1.237 to -0.6770
										Data summary
										Number of columns (Column Factor)	2
										Number of rows (Row Factor)	5
										Number of values	30
