# Supplementary material for: Wnt- and glutamate-receptors orchestrate stem cell dynamics and asymmetric cell division
Source: eLife. 2021 May 24;10:e59791. doi: 10.7554/eLife.59791 (PMC8177892; doi:10.7554/eLife.59791)
Supplement: Figure 2—source data 1. [file elife-59791-fig2-data1.xlsx]

## Sheet: Figure 2
Panel A
time (hours)	WT				Average	Lrp5KO #1				Average	Lrp5KO (#2)				Average	Lrp5KO (#1 and #2) average		Two-way ANOVA	Ordinary
0	8.57143	12.6984	11.8391	3.92157	9.25762	12.8792	21.5278	21.5385		18.6485	10.7477	5.04202	12.6506	2.69058	7.78272	13.2156		Alpha	0.05						Within each row, compare columns (simple effects within rows)
1	22.2866	26.1111	27.6984	13.0713	22.2919	27.4746	35.6331	44.2693		35.7923	32.1101	30.0725	32.4841	24.1071	29.6934	32.7429
2	34.2437	36.553	34.1538	21.2466	31.5493	45.5729	44.5309	59.2857		49.7965	44.3396	46.6912	46.1039	49.7717	46.7266	48.2616		Source of Variation	% of total variation	P value	P value summary	Significant?			Number of families	5
3	37.0496	31.7215	48.3946	29.8967	36.7656	52.6495	53.5439	68.3674		58.1869	58.1081	53.6679	60.4027	55.2995	56.8696	57.5282		Interaction	3.939	0.0276	*	Yes			Number of comparisons per family	2
4	41.5038	43.5185	48.913	41.2037	43.7848	54.072	53.8188	74.0426		60.6444	64.2534	61.811	63.4483	69.1176	64.6576	62.651		Row Factor	72.88	<0.0001	****	Yes			Alpha	0.05
																		Column Factor	13.56	<0.0001	****	Yes
																									Dunnett's multiple comparisons test	Predicted (LS) mean diff.	95.00% CI of diff.	Below threshold?	Summary	Adjusted P Value		Test details	Predicted (LS) mean 1	Predicted (LS) mean 2	Predicted (LS) mean diff.	SE of diff.	N1	N2	q	DF
																		ANOVA table	SS (Type III)	DF	MS	F (DFn, DFd)	P value
																		Interaction	744.6	8	93.08	F (8, 40) = 2.479	P=0.0276		0h
																		Row Factor	13779	4	3445	F (4, 40) = 91.73	P<0.0001		WT vs. Lrp5KO (#1)	-9.391	-20.14 to 1.361	No	ns	0.0938		WT vs. Lrp5KO (#1)	9.258	18.65	-9.391	4.68	4	3	2.006	40
																		Column Factor	2563	2	1281	F (2, 40) = 34.13	P<0.0001		WT vs. Lrp5KO (#2)	1.475	-8.480 to 11.43	No	ns	0.9209		WT vs. Lrp5KO (#2)	9.258	7.783	1.475	4.333	4	4	0.3404	40
																		Residual	1502	40	37.55
																									1h
																		Data summary							WT vs. Lrp5KO (#1)	-13.5	-24.25 to -2.748	Yes	*	0.012		WT vs. Lrp5KO (#1)	22.29	35.79	-13.5	4.68	4	3	2.885	40
																		Number of columns (Column Factor)	3						WT vs. Lrp5KO (#2)	-7.402	-17.36 to 2.553	No	ns	0.1688		WT vs. Lrp5KO (#2)	22.29	29.69	-7.402	4.333	4	4	1.708	40
																		Number of rows (Row Factor)	5
																		Number of values	55						2h
																									WT vs. Lrp5KO (#1)	-18.25	-29.00 to -7.495	Yes	***	0.0007		WT vs. Lrp5KO (#1)	31.55	49.8	-18.25	4.68	4	3	3.899	40
																									WT vs. Lrp5KO (#2)	-15.18	-25.13 to -5.223	Yes	**	0.0023		WT vs. Lrp5KO (#2)	31.55	46.73	-15.18	4.333	4	4	3.503	40
																									3h
																									WT vs. Lrp5KO (#1)	-21.42	-32.17 to -10.67	Yes	****	<0.0001		WT vs. Lrp5KO (#1)	36.77	58.19	-21.42	4.68	4	3	4.577	40
																									WT vs. Lrp5KO (#2)	-20.1	-30.06 to -10.15	Yes	****	<0.0001		WT vs. Lrp5KO (#2)	36.77	56.87	-20.1	4.333	4	4	4.64	40
																									4h
																									WT vs. Lrp5KO (#1)	-16.86	-27.61 to -6.108	Yes	**	0.0017		WT vs. Lrp5KO (#1)	43.78	60.64	-16.86	4.68	4	3	3.602	40
																									WT vs. Lrp5KO (#2)	-20.87	-30.83 to -10.92	Yes	****	<0.0001		WT vs. Lrp5KO (#2)	43.78	64.66	-20.87	4.333	4	4	4.817	40
Panel B
time (hours)	WT (repeated from Panel A)				Average	Lrp6KO #1				Average	Lrp6KO (#2)				Average			Two-way ANOVA	Ordinary						Number of families	5
0	8.57143	12.6984	11.8391	3.92157	9.25762	12.7907	13.75	10.7692		12.4366	0.833333	3.19149	6.07735		3.36739			Alpha	0.05						Number of comparisons per family	2
1	22.2866	26.1111	27.6984	13.0713	22.2919	20.202	21.9512	22.5352		21.5628	7.14286	15.5689	13.8122		12.1746										Alpha	0.05
2	34.2437	36.553	34.1538	21.2466	31.5493	19.7917	30.2326	30.8823		26.9689	11.194	20.625	16.2011		16.0067			Source of Variation	% of total variation	P value	P value summary	Significant?
3	37.0496	31.7215	48.3946	29.8967	36.7656	27.3684	36.1446	29.5082		31.0071	15.7895	20.2312	19.7802		18.6003			Interaction	4.647	0.1433	ns	No			Dunnett's multiple comparisons test	Predicted (LS) mean diff.	95.00% CI of diff.	Below threshold?	Summary	Adjusted P Value		Test details	Predicted (LS) mean 1	Predicted (LS) mean 2	Predicted (LS) mean diff.	SE of diff.	N1	N2	q	DF
4	41.5038	43.5185	48.913	41.2037	43.7848	29.4737	38.5542	38.3333		35.4537	17.094	22.0859	23.1214		20.7671			Row Factor	51.51	<0.0001	****	Yes
																		Column Factor	26.57	<0.0001	****	Yes			0h
																									WT vs. Lrp6KO (#1)	-3.179	-12.03 to 5.674	No	ns	0.6294		WT vs. Lrp6KO (#1)	9.258	12.44	-3.179	3.827	4	3	0.8306	35
																		ANOVA table	SS (Type III)	DF	MS	F (DFn, DFd)	P value		WT vs. Lrp6KO (#2)	5.89	-2.963 to 14.74	No	ns	0.2324		WT vs. Lrp6KO (#2)	9.258	3.367	5.89	3.827	4	3	1.539	35
																		Interaction	333.7	8	41.71	F (8, 35) = 1.661	P=0.1433
																		Row Factor	3699	4	924.7	F (4, 35) = 36.83	P<0.0001		1h
																		Column Factor	1908	2	953.8	F (2, 35) = 37.99	P<0.0001		WT vs. Lrp6KO (#1)	0.729	-8.124 to 9.582	No	ns	0.9749		WT vs. Lrp6KO (#1)	22.29	21.56	0.729	3.827	4	3	0.1905	35
																		Residual	878.9	35	25.11				WT vs. Lrp6KO (#2)	10.12	1.264 to 18.97	Yes	*	0.0232		WT vs. Lrp6KO (#2)	22.29	12.17	10.12	3.827	4	3	2.643	35
																		Data summary							2h
																		Number of columns (Column Factor)	3						WT vs. Lrp6KO (#1)	4.58	-4.272 to 13.43	No	ns	0.398		WT vs. Lrp6KO (#1)	31.55	26.97	4.58	3.827	4	3	1.197	35
																		Number of rows (Row Factor)	5						WT vs. Lrp6KO (#2)	15.54	6.690 to 24.40	Yes	***	0.0005		WT vs. Lrp6KO (#2)	31.55	16.01	15.54	3.827	4	3	4.061	35
																		Number of values	50
																									3h
																									WT vs. Lrp6KO (#1)	5.759	-3.094 to 14.61	No	ns	0.2464		WT vs. Lrp6KO (#1)	36.77	31.01	5.759	3.827	4	3	1.505	35
																									WT vs. Lrp6KO (#2)	18.17	9.312 to 27.02	Yes	****	<0.0001		WT vs. Lrp6KO (#2)	36.77	18.6	18.17	3.827	4	3	4.746	35
																									4h
																									WT vs. Lrp6KO (#1)	8.331	-0.5218 to 17.18	No	ns	0.0674		WT vs. Lrp6KO (#1)	43.78	35.45	8.331	3.827	4	3	2.177	35
																									WT vs. Lrp6KO (#2)	23.02	14.16 to 31.87	Yes	****	<0.0001		WT vs. Lrp6KO (#2)	43.78	20.77	23.02	3.827	4	3	6.014	35
Panel C
time (hours)	WT (repeated from Panel A)				Average	Lrp5/6dKO #1				Average	Lrp5/6dKO (#2)				Average			Two-way ANOVA	Ordinary						Number of families	5
0	8.57143	12.6984	11.8391	3.92157	9.25762	12.4098	16.0417	11.7647		13.4054	9.26829	15.8798	13.6095		12.9192			Alpha	0.05						Number of comparisons per family	2
1	22.2866	26.1111	27.6984	13.0713	22.2919	17.2859	26.2542	18.1818		20.574	15.566	19.9153	20.9039		18.7951										Alpha	0.05
2	34.2437	36.553	34.1538	21.2466	31.5493	21.7593	26.4581	27.2727		25.1634	23.3831	23.7288	29.2818		25.4646			Source of Variation	% of total variation	P value	P value summary	Significant?
3	37.0496	31.7215	48.3946	29.8967	36.7656	30.7647	30.2118	31.4286		30.8017	34.0206	29.4372	32.3353		31.9311			Interaction	5.108	0.1391	ns	No			Dunnett's multiple comparisons test	Predicted (LS) mean diff.	95.00% CI of diff.	Below threshold?	Summary	Adjusted P Value		Test details	Predicted (LS) mean 1	Predicted (LS) mean 2	Predicted (LS) mean diff.	SE of diff.	N1	N2	q	DF
4	41.5038	43.5185	48.913	41.2037	43.7848	30.5851	33.8629	30.303		31.5837	35.4497	34.4681	41.4201		37.1126			Row Factor	72.11	<0.0001	****	Yes
																		Column Factor	3.439	0.018	*	Yes			0h
																									WT vs. Lrp56dKO (#1)	-4.148	-12.34 to 4.047	No	ns	0.413		WT vs. Lrp56dKO (#1)	9.258	13.41	-4.148	3.543	4	3	1.171	35
																		ANOVA table	SS (Type III)	DF	MS	F (DFn, DFd)	P value		WT vs. Lrp56dKO (#2)	-3.662	-11.86 to 4.533	No	ns	0.4962		WT vs. Lrp56dKO (#2)	9.258	12.92	-3.662	3.543	4	3	1.034	35
																		Interaction	288.6	8	36.08	F (8, 35) = 1.677	P=0.1391
																		Row Factor	4074	4	1018	F (4, 35) = 47.33	P<0.0001		1h
																		Column Factor	194.3	2	97.15	F (2, 35) = 4.515	P=0.0180		WT vs. Lrp56dKO (#1)	1.718	-6.477 to 9.913	No	ns	0.8498		WT vs. Lrp56dKO (#1)	22.29	20.57	1.718	3.543	4	3	0.4849	35
																		Residual	753.1	35	21.52				WT vs. Lrp56dKO (#2)	3.497	-4.698 to 11.69	No	ns	0.526		WT vs. Lrp56dKO (#2)	22.29	18.8	3.497	3.543	4	3	0.987	35
																		Data summary							2h
																		Number of columns (Column Factor)	3						WT vs. Lrp56dKO (#1)	6.386	-1.809 to 14.58	No	ns	0.1442		WT vs. Lrp56dKO (#1)	31.55	25.16	6.386	3.543	4	3	1.803	35
																		Number of rows (Row Factor)	5						WT vs. Lrp56dKO (#2)	6.085	-2.110 to 14.28	No	ns	0.1691		WT vs. Lrp56dKO (#2)	31.55	25.46	6.085	3.543	4	3	1.717	35
																		Number of values	50
																									3h
																									WT vs. Lrp56dKO (#1)	5.964	-2.231 to 14.16	No	ns	0.1801		WT vs. Lrp56dKO (#1)	36.77	30.8	5.964	3.543	4	3	1.683	35
																									WT vs. Lrp56dKO (#2)	4.835	-3.360 to 13.03	No	ns	0.3095		WT vs. Lrp56dKO (#2)	36.77	31.93	4.835	3.543	4	3	1.365	35
																									4h
																									WT vs. Lrp56dKO (#1)	12.2	4.006 to 20.40	Yes	**	0.003		WT vs. Lrp56dKO (#1)	43.78	31.58	12.2	3.543	4	3	3.444	35
																									WT vs. Lrp56dKO (#2)	6.672	-1.523 to 14.87	No	ns	0.1234		WT vs. Lrp56dKO (#2)	43.78	37.11	6.672	3.543	4	3	1.883	35
Panel D
time (hours)	WT (repeated from Panel A)				Average	BKO				Average		WT			Time		Discovery?	P value	Mean of WT	Mean of BKO	Difference	SE of difference	t ratio	df	q value
0	8.57143	12.6984	11.8391	3.92157	9.25762	8.65385	9.27835	3.84615		7.25945		vs.			0h		No	0.500976	9.258	7.259	1.998	2.756	0.725	5	0.670128
1	22.2866	26.1111	27.6984	13.0713	22.2919	24.7706	19.1011	16.9935		20.2884		BKO			1h		No	0.663493	22.29	20.29	2.003	4.337	0.462	5	0.670128
2	34.2437	36.553	34.1538	21.2466	31.5493	36.8421	26.5823	20.625		28.0165					2h		No	0.563434	31.55	28.02	3.533	5.714	0.6183	5	0.670128
3	37.0496	31.7215	48.3946	29.8967	36.7656	43.3333	31.5789	25.4658		33.4594		Test details			3h		No	0.63746	36.77	33.46	3.306	6.596	0.5013	5	0.670128
4	41.5038	43.5185	48.913	41.2037	43.7848	46.8085	34.375	32.8571		38.0136		Test name	Unpaired t test		4h		No	0.233318	43.78	38.01	5.771	4.258	1.355	5	0.670128
												Variance assumption	Individual variance for each row
												Multiple comparisons	False Discovery Rate (FDR)
												Method	Two-stage step-up (Benjamini, Krieger, and Yekutieli)
												Desired FDR (Q)	1.00%
												Number of tests performed	5
												Number of rows omitted	0
Panel E
Cell movement	WT Wnt3a	WT iWnt3a	Lrp5KO(#1)	Lrp5KO (#2)	Lrp6KO(#1)	Lrp6KO (#2)	Lrp56dKO (#1)	Lrp56dKO (#2)	BKO			ANOVA summary							Dunnett's multiple comparisons test	Mean Diff.	95.00% CI of diff.	Below threshold?	Summary	Adjusted P Value	A-?
	1.43575	1.3743	1.09836	1.19444	3.34078	0.505556	1.16022		0.776536			F	3.256						WT active vs. WT inactive	-0.2475	-0.6947 to 0.1997	No	ns	0.5615	B	WT inactive
	1.18994	0.98324	0.792386	0.805556	1.20112	1.21667	1.53591	0.805556	68.9106145*			P value	0.0013						WT active vs. Lrp5KO	-0.4385	-0.8950 to 0.01797	No	ns	0.0659	C	Lrp5KO
	0.798883	1.02793	1.28911	0.688889	1.49162	0.644444	2.19337	0.555556	0.804469			P value summary	**						WT active vs. Lrp5KO-c84	-0.2899	-0.7774 to 0.1976	No	ns	0.4812	D	Lrp5KO-c84
	1.35196	1.31285	0.964031	9.31666667*	1.19553	1.26667	1.19337	0.883333	0.625698			Significant diff. among means (P < 0.05)?	Yes						WT active vs. Lrp6KO	-0.01543	-0.4648 to 0.4340	No	ns	0.9999	E	Lrp6KO
	1.11173	1.34637	0.91969	1.39444	0.692737	0.527778	0.933702	0.822222	1.07263			R squared	0.06029						WT active vs. Lrp6KO-c73	0.1255	-0.3285 to 0.5796	No	ns	0.977	F	Lrp6KO-c73
	1.34637	1.07821	1.43171	1.97778	0.731844	1	1.28729	3.58889	0.910615										WT active vs. Lrp56dKO	-0.1837	-0.6308 to 0.2635	No	ns	0.8354	G	Lrp56dKO
	0.972067	0.614525	1.41829	2.26667	2.11173	0.711111	1.19337	1.37778	4.10056			Brown-Forsythe test							WT active vs. Lrp56dKO-c62	0.1597	-0.3048 to 0.6242	No	ns	0.9258	H	Lrp56dKO-c62
	1.26257	1.67598	2.71025	2.96667	2.12849	0.95	1.60773	0.505556	46.5418994*			F (DFn, DFd)	0.9911 (8, 406)						WT active vs. BKO	0.1874	-0.2666 to 0.6415	No	ns	0.8318	I	BKO
	1.06704	1.73743	2.04921	1.80556	0.536313	0.972222	1.49724	1.06667	1.36313			P value	0.4423
	1.13408	1.07263	2.07904	1.77778	1.68715	0.488889	1.43094	1.04444	1.2514			P value summary	ns						Test details	Mean 1	Mean 2	Mean Diff.	SE of diff.	n1	n2	q	DF
	2.07821	2.78771	3.29875	2.36667	0.670391	1.26667	1.26519	2.35556	0.318436			Are SDs significantly different (P < 0.05)?	No						WT active vs. WT inactive	1.169	1.417	-0.2475	0.1677	47	50	1.476	406
	84.1284916*	1.35196	1.29036	1.41667	0.681564	1.1	1.1768	0.877778	0.513966										WT active vs. Lrp5KO	1.169	1.608	-0.4385	0.1712	47	46	2.561	406
	1.45251	2.01117	1.97118	1.49444	0.709497	0.833333	1.25967	0.872222	1.07821			Bartlett's test							WT active vs. Lrp5KO-c84	1.169	1.459	-0.2899	0.1828	47	36	1.585	406
	0.955307	1.50279	1.69945	1.87222	0.592179	0.611111	1.28729	0.627778	1.09497			Bartlett's statistic (corrected)	56.28						WT active vs. Lrp6KO	1.169	1.185	-0.01543	0.1686	47	49	0.09156	406
	1.60894	1.13966	1.05406	0.672222	0.636872	38.95*	0.61326	0.755556	0.73743			P value	<0.0001						WT active vs. Lrp6KO-c73	1.169	1.044	0.1255	0.1703	47	47	0.7371	406
	1.29609	2.34078	1.25644	0.8	1.35196	0.811111	1.34807	0.65	1.51955			P value summary	****						WT active vs. Lrp56dKO	1.169	1.353	-0.1837	0.1677	47	50	1.095	406
	1.07821	1.30726	1.70826	0.783333	0.564246	0.861111	0.845304	1.20556	0.636872			Are SDs significantly different (P < 0.05)?	Yes						WT active vs. Lrp56dKO-c62	1.169	1.01	0.1597	0.1742	47	43	0.9166	406
	1.13408	1.06704	1.257	0.916667	0.670391	0.672222	1.49724	1.03889	1.98324										WT active vs. BKO	1.169	0.9819	0.1874	0.1703	47	47	1.101	406
	1.32961	0.620112	0.812994	0.7	0.860335	1.24444	0.80663	0.927778	0.670391			ANOVA table	SS	DF	MS	F (DFn, DFd)	P value
	1.89385	0.910615	2.50273	1.44444	0.849162	0.483333	1.81768	1.51111	0.603352			Treatment (between columns)	17.75	8	2.219	F (8, 406) = 3.256	P=0.0013
	0.681564	1.55307	1.79014	2.7	0.72067	1.28333	0.98895	0.45	1.06704			Residual (within columns)	276.7	406	0.6815
	1.49721	0.932961	2.41853	0.544444	0.558659	0.7	0.977901	1.42778	0.385475			Total	294.5	414
	0.905028	1.21788	0.84153	0.694444	0.446927	1.12222	1.12707	0.861111	0.407821
	1.00559	2.41341	1.44786	1.14444	0.558659	0.472222	1.40884	0.5	0.592179			Data summary
	0.73743	1.36872	2.30074	0.75	1.28492	0.761111	0.79558	1.36111	0.664804			Number of treatments (columns)	9
	0.949721	1.1676	45.5248202*	0.861111	0.826816	1.52222	0.79558	0.833333	0.854749			Number of values (total)	415
	1.05587	1.7095	86.0307558*	0.85	1.60335	5.85556	0.679558	1.03333	31.3128492*
	0.748603	0.72067	1.24553	0.727778	1.03911	1.08889	1.67956	0.622222	0.743017
	169.050279*	0.921788	2.08368	1.33333	0.905028	0.972222	1.02762	100.194444*	0.569832
	1.05028	2.6257	1.63877	0.85	0.782123	1.41111	1.0884	1.20556	0.748603
	2.2905	1.05587	0.934006	2.13889	6.61453	0.866667	1.37569	3.05556	0.636872
	0.787709	1.5419	1.33126	1.09444	0.664804	0.916667	1.81768	0.35	0.497207
	0.938547	1.03911	1.34315	1.87778	0.284916	0.666667	1.23757	1.69444	1.2067
	1.17877	3.8324	163.632508*	3.02222	0.614525	0.622222	4.51381	0.444444	0.804469
	1.44693	0.955307	1.43721	9.45555556*	3.16201	1.07778	1.54144	0.25	2.7095
	0.96648	0.687151	0.903929	3.75556	0.351955	1.29444	1.32044	0.733333	0.452514
	1.05587	3.83799	1.28243	1.25556	0.47486	2.02222	2.12155	1.32222	0.675978
	0.776536	1.09497	33.0496467*	1.58889	1.10056	1.52222	0.497238	0.838889	0.553073
	1.37989	0.938547	7.28916		0.368715	0.466667	0.624309	0.455556	0.821229
	1.44134	1.18436	0.579235		0.664804	1.06111	1.1989	0.566667	0.709497
	0.659218	0.882682	0.58818		0.564246	0.666667	0.895028	1.38333	1.2905
	0.374302	0.905028	0.79225		0.575419	0.583333	1.32597	0.466667	1.64246
	1.50838	1.08939	1.00527		0.519553	0.983333	0.685083	1.12222	0.106145
	0.893855	2.56983	1.93965		0.536313	1.27222	1.35359	0.411111	0.642458
	1.0838	1.00559	1.49571		0.586592	0.811111	1.39779	0.555556	0.22905
	0.810056	1.02793	1.38349		0.888268	0.533333	2.16575		2.97207
	2.83799	1.79888	1.86885		19.2290503*	0.644444	0.895028		1.16201
	0.592179	1.7486	2.13115		1.75419	1.69444	0.883978		0.357542
	0.810056	0.944134	1.30828		5.72067		3.8674		2.50838
		0.810056	0.980897		1.17877		1.41436		0.0782123
Count	47	50	46	36	49	47	50	43	47
Average	1.16938	1.41687	1.60792	1.45926	1.18481	1.04385	1.35304	1.00969	0.981933	Min	0.981933	Max	1.60792
Median	1.07821	1.15363	1.36332	1.29444	0.72067	0.916667	1.26243	0.861111	0.743017	Min	0.72067	Max	1.36332
blue values are excluded outliers
