# Supplementary material for: Wnt- and glutamate-receptors orchestrate stem cell dynamics and asymmetric cell division
Source: eLife. 2021 May 24;10:e59791. doi: 10.7554/eLife.59791 (PMC8177892; doi:10.7554/eLife.59791)
Supplement: Figure 3—source data 1. [file elife-59791-fig3-data1.xlsx]

## Sheet: Figure 3
Panel A
hours	WT + Wnt3a				Average	WT + iWnt3a				Average
0	21.4452	27.2727	13.3333	23.1574	21.3021	15.538	4.9754	8.9286		9.814
1	47.4048	41.5385	21.8391	34.033	36.2039	7.4176	7.619	14.286		9.7742
2	41.8269	49.6063	38.6364	38.7292	42.1997	12.5	14.709	13.889		13.6993
3	44.3602	55.1724	52.2727	43.4297	48.8087	12.765	14.176	15.278		14.073
4	45.0476	56.4103	68.75	46.2167	54.1061	16.146	14.643	15.584		15.4577
5	48.7879	58.9286	72.7273	45.1693	56.4033	14.785	14.835	16.901		15.507
6	47.6154	59.596	69.0476	46.5166	55.6939	15.072	12.5	21.795		16.4557
7	51.9143	70.1031	68.6047	50.578	60.3	15.23	12.973	26.316		18.173
8	52.8734	64.9485	76.25	51.0006	61.2681	16.897	10.061	25.333		17.4303
9	58.0351	68.8889	69.2308	51.5151	61.9175	15.825	15.268	26.866		19.3197
10	59.4507	74.1573	68.8889	48.4876	62.7461	17.99	19.351	22.535		19.9587
11	59.7887	73.8636	70.1149	50.3596	63.5317	21.429	18.333	25.714		21.8253
12	61.7823	68.8172	69.6629	52.8395	63.2755	18.008	12.757	25		18.5883
Panel B
hours	WT + Wnt3a (reused from Panel A)				Average	Lrp5KO #1				Average	Lrp5KO #2				Average	Lrp5KO(#1 and #2) average
0	21.4452	27.2727	13.3333	23.1574	21.3021	38.2143	49.8366	47.2222		45.091	42.0561	13.0252	42.1687	43.0493	35.0748	40.0829
1	47.4048	41.5385	21.8391	34.033	36.2039	40.0319	52.0513	41.0256		44.3696	53.6697	23.1884	49.6815	52.6786	44.8046	44.5871
2	41.8269	49.6063	38.6364	38.7292	42.1997	41.1422	56.6176	40		45.9199	58.4906	29.0441	51.9481	57.0776	49.1401	47.53
3	44.3602	55.1724	52.2727	43.4297	48.8087	44.0278	55.0481	41.8605		46.9788	59.009	32.8185	59.0604	66.3594	54.3118	50.6453
4	45.0476	56.4103	68.75	46.2167	54.1061	52.5799	55.6676	42.8571		50.3682	58.371	36.6142	62.069	75	58.0135	54.1909
5	48.7879	58.9286	72.7273	45.1693	56.4033	54.7104	65.3719	47.5		55.8608	60.177	37.5494	70.073	73.5294	60.3322	58.0965
6	47.6154	59.596	69.0476	46.5166	55.6939	56.0606	63.8499	41.4634		53.7913	64.7321	63.8889	69.8529	78.7129	69.2967	61.544
7	51.9143	70.1031	68.6047	50.578	60.3	50.9978	58.1428	46.3415		51.8274	67.6856	67.1053	69.1781	76.1905	70.0399	60.9336
8	52.8734	64.9485	76.25	51.0006	61.2681	54.3607	54.7956	45.6522		51.6028	65.1452	67.1141	66.0131	78.3019	69.1436	60.3732
9	58.0351	68.8889	69.2308	51.5151	61.9175	48.0808	57.0383	50		51.7064	66.25	67.5325	69.8113	79.3722	70.7415	61.2239
10	59.4507	74.1573	68.8889	48.4876	62.7461	58.3333	55.3156	57.7778		57.1422	67.4897	72.6027	64.8809	80.0885	71.2655	64.2039
11	59.7887	73.8636	70.1149	50.3596	63.5317	56.1553	56.8797	50.9434		54.6595	68.421	74.8344	65.0888	77.4892	71.4584	63.0589
12	61.7823	68.8172	69.6629	52.8395	63.2755	54.9911	56.2906	56.3636		55.8818	67.4603	68.639	64	77.6824	69.4454	62.6636
Panel C
hours	WT + Wnt3a (reused from Panel A)				Average	Lrp6KO #1				Avearge	Lrp6KO #2				Average	Lrp6KO(#1 and #2) average
0	21.4452	27.2727	13.3333	23.1574	21.3021	18.3908	36.0465	13.3333		22.5902	20	25	20.442		21.814	22.2021
1	47.4048	41.5385	21.8391	34.033	36.2039	24.7706	37.2093	16.9014		26.2938	27.8571	36.5269	23.7569		29.3803	27.8371
2	41.8269	49.6063	38.6364	38.7292	42.1997	28.972	39.0805	14.0845		27.379	31.3433	42.5	21.2291		31.6908	29.5349
3	44.3602	55.1724	52.2727	43.4297	48.8087	30	34.8315	22.3881		29.0732	33.3333	36.4162	23.0769		30.9421	30.0077
4	45.0476	56.4103	68.75	46.2167	54.1061	28.7129	38.75	20.5882		29.3504	37.6068	37.4233	23.6994		32.9099	31.1301
5	48.7879	58.9286	72.7273	45.1693	56.4033	29	38.5542	21.9178		29.824	38.0165	42.5806	24.8619		35.153	32.4885
6	47.6154	59.596	69.0476	46.5166	55.6939	28.5714	38.0952	25		30.5555	42.9825	42.5806	27.4725		37.6785	34.117
7	51.9143	70.1031	68.6047	50.578	60.3	29.6296	37.0787	27.5		31.4028	42.9907	41.2121	27.9188		37.3738	34.3883
8	52.8734	64.9485	76.25	51.0006	61.2681	31.3131	33.3333	30		31.5488	44.9541	39.6739	30.5825		38.4035	34.9762
9	58.0351	68.8889	69.2308	51.5151	61.9175	32.7103	32.7273	29.1139		31.5172	50	42.515	35.2941		42.603	37.0601
10	59.4507	74.1573	68.8889	48.4876	62.7461	34.2593	34.1463	28.9157		32.4404	42.1053	45.8333	29.5238		39.1541	35.7973
11	59.7887	73.8636	70.1149	50.3596	63.5317	30.2521	36.1905	33.2213		33.2213	40.3361	42.623	29.7561		37.5717	35.3965
12	61.7823	68.8172	69.6629	52.8395	63.2755	30.3279	34.7107	32.5193		32.5193	40.3361	44	31.7073		38.6811	35.6002
Panel D
hours	WT + Wnt3a (reused from Panel A)				Average	Lrp5/6dKO #1				Average	Lrp5/6d6KO #2				Average	Lrp6KO(#1 and #2) average
0	21.4452	27.2727	13.3333	23.1574	21.3021	38.3333	35.8453	25		33.0595	24.4444	28.0575	26.5957		26.3659	29.7127
1	47.4048	41.5385	21.8391	34.033	36.2039	35.9375	37.0664	30		34.3346	27.4648	33.0882	35.1064		31.8865	33.1106
2	41.8269	49.6063	38.6364	38.7292	42.1997	30.303	35.2527	29.2683		31.608	26.0274	32.5926	36.5591		31.7264	31.6672
3	44.3602	55.1724	52.2727	43.4297	48.8087	37.7049	34.398	25		32.3676	31.3433	37.5	37.0787		35.3073	33.8375
4	45.0476	56.4103	68.75	46.2167	54.1061	31.8182	38.2353	27.907		32.6535	31.1111	35.461	43.0233		36.5318	34.5926
5	48.7879	58.9286	72.7273	45.1693	56.4033	29.8507	37.0778	27.2727		31.4004	30.9352	39.4161	48.7805		39.7106	35.5555
6	47.6154	59.596	69.0476	46.5166	55.6939	34.3284	36.1498	23.8095		31.4292	31.5069	36.6197	48.75		38.9589	35.194
7	51.9143	70.1031	68.6047	50.578	60.3	33.3333	39.367	27.2727		33.3243	30.4054	39.7351	50		40.0468	36.6856
8	52.8734	64.9485	76.25	51.0006	61.2681	33.7838	37.1795	28.8889		33.2841	36	37.8882	50.5618		41.4833	37.3837
9	58.0351	68.8889	69.2308	51.5151	61.9175	36.9231	37.709	27.6596		34.0972	38.1579	37.7907	50		41.9829	38.04
10	59.4507	74.1573	68.8889	48.4876	62.7461	34.7222	32.9825	23.5294		30.4114	42.1053	41.3174	49.4845		44.3024	37.3569
11	59.7887	73.8636	70.1149	50.3596	63.5317	29.1139	31.5067	22.6415		27.754	43.1373	39.0805	51.6129		44.6102	36.1821
12	61.7823	68.8172	69.6629	52.8395	63.2755	35.6164	33.2181	25.4545		31.4297	40.5063	39.2045	53.3333		44.3481	37.8889
Panel E
hours	WT + Wnt3a (reused from Panel A)				Average	BKO				Average
0	21.4452	27.2727	13.3333	23.1574	21.3021	13.5789	15	26		18.193
1	47.4048	41.5385	21.8391	34.033	36.2039	19.0476	15.7895	29.4118		21.4163
2	41.8269	49.6063	38.6364	38.7292	42.1997	25.5311	15.5556	36		25.6956
3	44.3602	55.1724	52.2727	43.4297	48.8087	25.4011	13.0952	29.4118		22.636
4	45.0476	56.4103	68.75	46.2167	54.1061	25.2584	16.4706	31.25		24.3263
5	48.7879	58.9286	72.7273	45.1693	56.4033	27.467	18.2927	23.4043		23.0547
6	47.6154	59.596	69.0476	46.5166	55.6939	27.5798	20.9877	26.6667		25.0781
7	51.9143	70.1031	68.6047	50.578	60.3	29.9811	21.25	27.2727		26.1679
8	52.8734	64.9485	76.25	51.0006	61.2681	33.3333	21.0526	35		29.7953
9	58.0351	68.8889	69.2308	51.5151	61.9175	30.2632	18.1818	36.8421		28.429
10	59.4507	74.1573	68.8889	48.4876	62.7461	30.9009	22.3881	30.5556		27.9482
11	59.7887	73.8636	70.1149	50.3596	63.5317	33.6478	20.8333	28.2051		27.5621
12	61.7823	68.8172	69.6629	52.8395	63.2755	37.1176	28.3582	32.5		32.6586
Panel F
Two-way ANOVA	Ordinary						Number of families	13
Alpha	0.05						Number of comparisons per family	8
							Alpha	0.05
Source of Variation	% of total variation	P value	P value summary	Significant?
Interaction	6.653	0.1309	ns	No			Dunnett's multiple comparisons test	Predicted (LS) mean diff.	95.00% CI of diff.	Below threshold?	Summary	Adjusted P Value		Test details	Predicted (LS) mean 1	Predicted (LS) mean 2	Predicted (LS) mean diff.	SE of diff.	N1	N2	q	DF
Row Factor	8.87	<0.0001	****	Yes
Column Factor	67.54	<0.0001	****	Yes			0h
							WT + Wnt3a vs. WT + iWnt3a	11.49	-4.842 to 27.82	No	ns	0.3064		WT + Wnt3a vs. WT + iWnt3a	21.3	9.814	11.49	6.068	4	3	1.893	258
ANOVA table	SS (Type III)	DF	MS	F (DFn, DFd)	P value		WT + Wnt3a vs. BKO	3.109	-13.22 to 19.44	No	ns	0.9972		WT + Wnt3a vs. BKO	21.3	18.19	3.109	6.068	4	3	0.5124	258
Interaction	7279	96	75.82	F (96, 258) = 1.201	P=0.1309		WT + Wnt3a vs. Lrp5KO (#1)	-23.79	-40.12 to -7.459	Yes	***	0.0009		WT + Wnt3a vs. Lrp5KO (#1)	21.3	45.09	-23.79	6.068	4	3	3.92	258
Row Factor	9704	12	808.6	F (12, 258) = 12.81	P<0.0001		WT + Wnt3a vs. Lrp6KO (#1)	-1.288	-17.62 to 15.04	No	ns	0.9997		WT + Wnt3a vs. Lrp6KO (#1)	21.3	22.59	-1.288	6.068	4	3	0.2123	258
Column Factor	73892	8	9236	F (8, 258) = 146.3	P<0.0001		WT + Wnt3a vs. Lrp56KO (#1)	-11.76	-28.09 to 4.573	No	ns	0.2823		WT + Wnt3a vs. Lrp56KO (#1)	21.3	33.06	-11.76	6.068	4	3	1.937	258
Residual	16288	258	63.13				WT + Wnt3a vs. Lrp5KO (#2)	-13.77	-28.89 to 1.346	No	ns	0.0926		WT + Wnt3a vs. Lrp5KO (#2)	21.3	35.07	-13.77	5.618	4	4	2.451	258
							WT + Wnt3a vs. Lrp56dKO (#2)	-5.064	-21.39 to 11.27	No	ns	0.962		WT + Wnt3a vs. Lrp56dKO (#2)	21.3	26.37	-5.064	6.068	4	3	0.8344	258
Data summary							WT + Wnt3a vs. Lrp6KO (#2)	-0.5119	-16.84 to 15.82	No	ns	0.9999		WT + Wnt3a vs. Lrp6KO (#2)	21.3	21.81	-0.5119	6.068	4	3	0.08435	258
Number of columns (Column Factor)	9
Number of rows (Row Factor)	13						1h
Number of values	375						WT + Wnt3a vs. WT + iWnt3a	26.43	10.10 to 42.76	Yes	***	0.0002		WT + Wnt3a vs. WT + iWnt3a	36.2	9.774	26.43	6.068	4	3	4.355	258
							WT + Wnt3a vs. BKO	14.79	-1.542 to 31.12	No	ns	0.0959		WT + Wnt3a vs. BKO	36.2	21.42	14.79	6.068	4	3	2.437	258
							WT + Wnt3a vs. Lrp5KO (#1)	-8.166	-24.50 to 8.164	No	ns	0.6873		WT + Wnt3a vs. Lrp5KO (#1)	36.2	44.37	-8.166	6.068	4	3	1.346	258
							WT + Wnt3a vs. Lrp6KO (#1)	9.91	-6.420 to 26.24	No	ns	0.4731		WT + Wnt3a vs. Lrp6KO (#1)	36.2	26.29	9.91	6.068	4	3	1.633	258
							WT + Wnt3a vs. Lrp56KO (#1)	1.869	-14.46 to 18.20	No	ns	0.9996		WT + Wnt3a vs. Lrp56KO (#1)	36.2	34.33	1.869	6.068	4	3	0.308	258
							WT + Wnt3a vs. Lrp5KO (#2)	-8.601	-23.72 to 6.518	No	ns	0.5478		WT + Wnt3a vs. Lrp5KO (#2)	36.2	44.8	-8.601	5.618	4	4	1.531	258
							WT + Wnt3a vs. Lrp56dKO (#2)	4.317	-12.01 to 20.65	No	ns	0.9854		WT + Wnt3a vs. Lrp56dKO (#2)	36.2	31.89	4.317	6.068	4	3	0.7115	258
							WT + Wnt3a vs. Lrp6KO (#2)	6.824	-9.507 to 23.15	No	ns	0.8384		WT + Wnt3a vs. Lrp6KO (#2)	36.2	29.38	6.824	6.068	4	3	1.124	258
							2h
							WT + Wnt3a vs. WT + iWnt3a	28.5	12.17 to 44.83	Yes	****	<0.0001		WT + Wnt3a vs. WT + iWnt3a	42.2	13.7	28.5	6.068	4	3	4.696	258
							WT + Wnt3a vs. BKO	16.5	0.1741 to 32.83	Yes	*	0.0462		WT + Wnt3a vs. BKO	42.2	25.7	16.5	6.068	4	3	2.72	258
							WT + Wnt3a vs. Lrp5KO (#1)	-3.72	-20.05 to 12.61	No	ns	0.9932		WT + Wnt3a vs. Lrp5KO (#1)	42.2	45.92	-3.72	6.068	4	3	0.613	258
							WT + Wnt3a vs. Lrp6KO (#1)	14.82	-1.509 to 31.15	No	ns	0.0947		WT + Wnt3a vs. Lrp6KO (#1)	42.2	27.38	14.82	6.068	4	3	2.442	258
							WT + Wnt3a vs. Lrp56KO (#1)	10.59	-5.738 to 26.92	No	ns	0.3963		WT + Wnt3a vs. Lrp56KO (#1)	42.2	31.61	10.59	6.068	4	3	1.745	258
							WT + Wnt3a vs. Lrp5KO (#2)	-6.94	-22.06 to 8.178	No	ns	0.7668		WT + Wnt3a vs. Lrp5KO (#2)	42.2	49.14	-6.94	5.618	4	4	1.235	258
							WT + Wnt3a vs. Lrp56dKO (#2)	10.47	-5.857 to 26.80	No	ns	0.4092		WT + Wnt3a vs. Lrp56dKO (#2)	42.2	31.73	10.47	6.068	4	3	1.726	258
							WT + Wnt3a vs. Lrp6KO (#2)	10.51	-5.821 to 26.84	No	ns	0.4053		WT + Wnt3a vs. Lrp6KO (#2)	42.2	31.69	10.51	6.068	4	3	1.732	258
							3h
							WT + Wnt3a vs. WT + iWnt3a	34.74	18.41 to 51.07	Yes	****	<0.0001		WT + Wnt3a vs. WT + iWnt3a	48.81	14.07	34.74	6.068	4	3	5.724	258
							WT + Wnt3a vs. BKO	26.17	9.843 to 42.50	Yes	***	0.0002		WT + Wnt3a vs. BKO	48.81	22.64	26.17	6.068	4	3	4.313	258
							WT + Wnt3a vs. Lrp5KO (#1)	1.83	-14.50 to 18.16	No	ns	0.9996		WT + Wnt3a vs. Lrp5KO (#1)	48.81	46.98	1.83	6.068	4	3	0.3016	258
							WT + Wnt3a vs. Lrp6KO (#1)	19.74	3.405 to 36.07	Yes	**	0.0094		WT + Wnt3a vs. Lrp6KO (#1)	48.81	29.07	19.74	6.068	4	3	3.252	258
							WT + Wnt3a vs. Lrp56KO (#1)	16.44	0.1111 to 32.77	Yes	*	0.0476		WT + Wnt3a vs. Lrp56KO (#1)	48.81	32.37	16.44	6.068	4	3	2.709	258
							WT + Wnt3a vs. Lrp5KO (#2)	-5.503	-20.62 to 9.616	No	ns	0.9129		WT + Wnt3a vs. Lrp5KO (#2)	48.81	54.31	-5.503	5.618	4	4	0.9795	258
							WT + Wnt3a vs. Lrp56dKO (#2)	13.5	-2.829 to 29.83	No	ns	0.1568		WT + Wnt3a vs. Lrp56dKO (#2)	48.81	35.31	13.5	6.068	4	3	2.225	258
							WT + Wnt3a vs. Lrp6KO (#2)	17.87	1.537 to 34.20	Yes	*	0.0244		WT + Wnt3a vs. Lrp6KO (#2)	48.81	30.94	17.87	6.068	4	3	2.944	258
							4h
							WT + Wnt3a vs. WT + iWnt3a	38.65	22.32 to 54.98	Yes	****	<0.0001		WT + Wnt3a vs. WT + iWnt3a	54.11	15.46	38.65	6.068	4	3	6.369	258
							WT + Wnt3a vs. BKO	29.78	13.45 to 46.11	Yes	****	<0.0001		WT + Wnt3a vs. BKO	54.11	24.33	29.78	6.068	4	3	4.907	258
							WT + Wnt3a vs. Lrp5KO (#1)	3.738	-12.59 to 20.07	No	ns	0.9932		WT + Wnt3a vs. Lrp5KO (#1)	54.11	50.37	3.738	6.068	4	3	0.616	258
							WT + Wnt3a vs. Lrp6KO (#1)	24.76	8.426 to 41.09	Yes	***	0.0005		WT + Wnt3a vs. Lrp6KO (#1)	54.11	29.35	24.76	6.068	4	3	4.079	258
							WT + Wnt3a vs. Lrp56KO (#1)	21.45	5.123 to 37.78	Yes	**	0.0036		WT + Wnt3a vs. Lrp56KO (#1)	54.11	32.65	21.45	6.068	4	3	3.535	258
							WT + Wnt3a vs. Lrp5KO (#2)	-3.907	-19.03 to 11.21	No	ns	0.9875		WT + Wnt3a vs. Lrp5KO (#2)	54.11	58.01	-3.907	5.618	4	4	0.6955	258
							WT + Wnt3a vs. Lrp56dKO (#2)	17.57	1.244 to 33.90	Yes	*	0.0282		WT + Wnt3a vs. Lrp56dKO (#2)	54.11	36.53	17.57	6.068	4	3	2.896	258
							WT + Wnt3a vs. Lrp6KO (#2)	21.2	4.866 to 37.53	Yes	**	0.0042		WT + Wnt3a vs. Lrp6KO (#2)	54.11	32.91	21.2	6.068	4	3	3.493	258
							5h
							WT + Wnt3a vs. WT + iWnt3a	40.9	24.57 to 57.23	Yes	****	<0.0001		WT + Wnt3a vs. WT + iWnt3a	56.4	15.51	40.9	6.068	4	3	6.739	258
							WT + Wnt3a vs. BKO	33.35	17.02 to 49.68	Yes	****	<0.0001		WT + Wnt3a vs. BKO	56.4	23.05	33.35	6.068	4	3	5.495	258
							WT + Wnt3a vs. Lrp5KO (#1)	0.5425	-15.79 to 16.87	No	ns	0.9999		WT + Wnt3a vs. Lrp5KO (#1)	56.4	55.86	0.5425	6.068	4	3	0.0894	258
							WT + Wnt3a vs. Lrp6KO (#1)	26.58	10.25 to 42.91	Yes	***	0.0001		WT + Wnt3a vs. Lrp6KO (#1)	56.4	29.82	26.58	6.068	4	3	4.38	258
							WT + Wnt3a vs. Lrp56KO (#1)	25	8.673 to 41.33	Yes	***	0.0004		WT + Wnt3a vs. Lrp56KO (#1)	56.4	31.4	25	6.068	4	3	4.12	258
							WT + Wnt3a vs. Lrp5KO (#2)	-3.929	-19.05 to 11.19	No	ns	0.987		WT + Wnt3a vs. Lrp5KO (#2)	56.4	60.33	-3.929	5.618	4	4	0.6993	258
							WT + Wnt3a vs. Lrp56dKO (#2)	16.69	0.3626 to 33.02	Yes	*	0.0425		WT + Wnt3a vs. Lrp56dKO (#2)	56.4	39.71	16.69	6.068	4	3	2.751	258
							WT + Wnt3a vs. Lrp6KO (#2)	21.25	4.920 to 37.58	Yes	**	0.0041		WT + Wnt3a vs. Lrp6KO (#2)	56.4	35.15	21.25	6.068	4	3	3.502	258
							6h
							WT + Wnt3a vs. WT + iWnt3a	39.24	22.91 to 55.57	Yes	****	<0.0001		WT + Wnt3a vs. WT + iWnt3a	55.69	16.46	39.24	6.068	4	3	6.466	258
							WT + Wnt3a vs. BKO	30.62	14.29 to 46.95	Yes	****	<0.0001		WT + Wnt3a vs. BKO	55.69	25.08	30.62	6.068	4	3	5.045	258
							WT + Wnt3a vs. Lrp5KO (#1)	1.903	-14.43 to 18.23	No	ns	0.9996		WT + Wnt3a vs. Lrp5KO (#1)	55.69	53.79	1.903	6.068	4	3	0.3135	258
							WT + Wnt3a vs. Lrp6KO (#1)	25.14	8.808 to 41.47	Yes	***	0.0004		WT + Wnt3a vs. Lrp6KO (#1)	55.69	30.56	25.14	6.068	4	3	4.142	258
							WT + Wnt3a vs. Lrp56KO (#1)	24.26	7.935 to 40.59	Yes	***	0.0007		WT + Wnt3a vs. Lrp56KO (#1)	55.69	31.43	24.26	6.068	4	3	3.999	258
							WT + Wnt3a vs. Lrp5KO (#2)	-13.6	-28.72 to 1.516	No	ns	0.0997		WT + Wnt3a vs. Lrp5KO (#2)	55.69	69.3	-13.6	5.618	4	4	2.421	258
							WT + Wnt3a vs. Lrp56dKO (#2)	16.74	0.4050 to 33.07	Yes	*	0.0417		WT + Wnt3a vs. Lrp56dKO (#2)	55.69	38.96	16.74	6.068	4	3	2.758	258
							WT + Wnt3a vs. Lrp6KO (#2)	18.02	1.685 to 34.35	Yes	*	0.0227		WT + Wnt3a vs. Lrp6KO (#2)	55.69	37.68	18.02	6.068	4	3	2.969	258
							7h
							WT + Wnt3a vs. WT + iWnt3a	42.13	25.80 to 58.46	Yes	****	<0.0001		WT + Wnt3a vs. WT + iWnt3a	60.3	18.17	42.13	6.068	4	3	6.942	258
							WT + Wnt3a vs. BKO	34.13	17.80 to 50.46	Yes	****	<0.0001		WT + Wnt3a vs. BKO	60.3	26.17	34.13	6.068	4	3	5.625	258
							WT + Wnt3a vs. Lrp5KO (#1)	8.473	-7.857 to 24.80	No	ns	0.6494		WT + Wnt3a vs. Lrp5KO (#1)	60.3	51.83	8.473	6.068	4	3	1.396	258
							WT + Wnt3a vs. Lrp6KO (#1)	28.9	12.57 to 45.23	Yes	****	<0.0001		WT + Wnt3a vs. Lrp6KO (#1)	60.3	31.4	28.9	6.068	4	3	4.762	258
							WT + Wnt3a vs. Lrp56KO (#1)	26.98	10.65 to 43.31	Yes	***	0.0001		WT + Wnt3a vs. Lrp56KO (#1)	60.3	33.32	26.98	6.068	4	3	4.445	258
							WT + Wnt3a vs. Lrp5KO (#2)	-9.74	-24.86 to 5.379	No	ns	0.4041		WT + Wnt3a vs. Lrp5KO (#2)	60.3	70.04	-9.74	5.618	4	4	1.734	258
							WT + Wnt3a vs. Lrp56dKO (#2)	20.25	3.923 to 36.58	Yes	**	0.0071		WT + Wnt3a vs. Lrp56dKO (#2)	60.3	40.05	20.25	6.068	4	3	3.337	258
							WT + Wnt3a vs. Lrp6KO (#2)	22.93	6.596 to 39.26	Yes	**	0.0015		WT + Wnt3a vs. Lrp6KO (#2)	60.3	37.37	22.93	6.068	4	3	3.778	258
							8h
							WT + Wnt3a vs. WT + iWnt3a	43.84	27.51 to 60.17	Yes	****	<0.0001		WT + Wnt3a vs. WT + iWnt3a	61.27	17.43	43.84	6.068	4	3	7.224	258
							WT + Wnt3a vs. BKO	31.47	15.14 to 47.80	Yes	****	<0.0001		WT + Wnt3a vs. BKO	61.27	29.8	31.47	6.068	4	3	5.186	258
							WT + Wnt3a vs. Lrp5KO (#1)	9.665	-6.665 to 26.00	No	ns	0.5022		WT + Wnt3a vs. Lrp5KO (#1)	61.27	51.6	9.665	6.068	4	3	1.593	258
							WT + Wnt3a vs. Lrp6KO (#1)	29.72	13.39 to 46.05	Yes	****	<0.0001		WT + Wnt3a vs. Lrp6KO (#1)	61.27	31.55	29.72	6.068	4	3	4.897	258
							WT + Wnt3a vs. Lrp56KO (#1)	27.98	11.65 to 44.31	Yes	****	<0.0001		WT + Wnt3a vs. Lrp56KO (#1)	61.27	33.28	27.98	6.068	4	3	4.611	258
							WT + Wnt3a vs. Lrp5KO (#2)	-7.875	-22.99 to 7.243	No	ns	0.6452		WT + Wnt3a vs. Lrp5KO (#2)	61.27	69.14	-7.875	5.618	4	4	1.402	258
							WT + Wnt3a vs. Lrp56dKO (#2)	19.78	3.455 to 36.11	Yes	**	0.0092		WT + Wnt3a vs. Lrp56dKO (#2)	61.27	41.48	19.78	6.068	4	3	3.26	258
							WT + Wnt3a vs. Lrp6KO (#2)	22.86	6.535 to 39.19	Yes	**	0.0016		WT + Wnt3a vs. Lrp6KO (#2)	61.27	38.4	22.86	6.068	4	3	3.768	258
							9h
							WT + Wnt3a vs. WT + iWnt3a	42.6	26.27 to 58.93	Yes	****	<0.0001		WT + Wnt3a vs. WT + iWnt3a	61.92	19.32	42.6	6.068	4	3	7.02	258
							WT + Wnt3a vs. BKO	33.49	17.16 to 49.82	Yes	****	<0.0001		WT + Wnt3a vs. BKO	61.92	28.43	33.49	6.068	4	3	5.518	258
							WT + Wnt3a vs. Lrp5KO (#1)	10.21	-6.119 to 26.54	No	ns	0.4385		WT + Wnt3a vs. Lrp5KO (#1)	61.92	51.71	10.21	6.068	4	3	1.683	258
							WT + Wnt3a vs. Lrp6KO (#1)	30.4	14.07 to 46.73	Yes	****	<0.0001		WT + Wnt3a vs. Lrp6KO (#1)	61.92	31.52	30.4	6.068	4	3	5.01	258
							WT + Wnt3a vs. Lrp56KO (#1)	27.82	11.49 to 44.15	Yes	****	<0.0001		WT + Wnt3a vs. Lrp56KO (#1)	61.92	34.1	27.82	6.068	4	3	4.584	258
							WT + Wnt3a vs. Lrp5KO (#2)	-8.824	-23.94 to 6.295	No	ns	0.5183		WT + Wnt3a vs. Lrp5KO (#2)	61.92	70.74	-8.824	5.618	4	4	1.571	258
							WT + Wnt3a vs. Lrp56dKO (#2)	19.93	3.605 to 36.26	Yes	**	0.0085		WT + Wnt3a vs. Lrp56dKO (#2)	61.92	41.98	19.93	6.068	4	3	3.285	258
							WT + Wnt3a vs. Lrp6KO (#2)	19.31	2.984 to 35.64	Yes	*	0.0118		WT + Wnt3a vs. Lrp6KO (#2)	61.92	42.6	19.31	6.068	4	3	3.183	258
							10h
							WT + Wnt3a vs. WT + iWnt3a	42.79	26.46 to 59.12	Yes	****	<0.0001		WT + Wnt3a vs. WT + iWnt3a	62.75	19.96	42.79	6.068	4	3	7.051	258
							WT + Wnt3a vs. BKO	34.8	18.47 to 51.13	Yes	****	<0.0001		WT + Wnt3a vs. BKO	62.75	27.95	34.8	6.068	4	3	5.734	258
							WT + Wnt3a vs. Lrp5KO (#1)	5.604	-10.73 to 21.93	No	ns	0.9349		WT + Wnt3a vs. Lrp5KO (#1)	62.75	57.14	5.604	6.068	4	3	0.9235	258
							WT + Wnt3a vs. Lrp6KO (#1)	30.31	13.98 to 46.64	Yes	****	<0.0001		WT + Wnt3a vs. Lrp6KO (#1)	62.75	32.44	30.31	6.068	4	3	4.994	258
							WT + Wnt3a vs. Lrp56KO (#1)	32.33	16.00 to 48.66	Yes	****	<0.0001		WT + Wnt3a vs. Lrp56KO (#1)	62.75	30.41	32.33	6.068	4	3	5.328	258
							WT + Wnt3a vs. Lrp5KO (#2)	-8.519	-23.64 to 6.599	No	ns	0.5586		WT + Wnt3a vs. Lrp5KO (#2)	62.75	71.27	-8.519	5.618	4	4	1.516	258
							WT + Wnt3a vs. Lrp56dKO (#2)	18.44	2.114 to 34.77	Yes	*	0.0184		WT + Wnt3a vs. Lrp56dKO (#2)	62.75	44.3	18.44	6.068	4	3	3.039	258
							WT + Wnt3a vs. Lrp6KO (#2)	23.59	7.262 to 39.92	Yes	**	0.001		WT + Wnt3a vs. Lrp6KO (#2)	62.75	39.15	23.59	6.068	4	3	3.888	258
							11h
							WT + Wnt3a vs. WT + iWnt3a	41.71	25.36 to 58.06	Yes	****	<0.0001		WT + Wnt3a vs. WT + iWnt3a	63.53	21.83	41.71	6.068	4	3	6.873	258
							WT + Wnt3a vs. BKO	35.97	19.62 to 52.32	Yes	****	<0.0001		WT + Wnt3a vs. BKO	63.53	27.56	35.97	6.068	4	3	5.927	258
							WT + Wnt3a vs. Lrp5KO (#1)	8.872	-7.478 to 25.22	No	ns	0.6052		WT + Wnt3a vs. Lrp5KO (#1)	63.53	54.66	8.872	6.068	4	3	1.462	258
							WT + Wnt3a vs. Lrp6KO (#1)	30.31	11.77 to 48.85	Yes	***	0.0001		WT + Wnt3a vs. Lrp6KO (#1)	63.53	33.22	30.31	6.881	4	2	4.405	258
							WT + Wnt3a vs. Lrp56KO (#1)	35.78	19.43 to 52.13	Yes	****	<0.0001		WT + Wnt3a vs. Lrp56KO (#1)	63.53	27.75	35.78	6.068	4	3	5.896	258
							WT + Wnt3a vs. Lrp5KO (#2)	-7.927	-23.06 to 7.211	No	ns	0.644		WT + Wnt3a vs. Lrp5KO (#2)	63.53	71.46	-7.927	5.618	4	4	1.411	258
							WT + Wnt3a vs. Lrp56dKO (#2)	18.92	2.571 to 35.27	Yes	*	0.0145		WT + Wnt3a vs. Lrp56dKO (#2)	63.53	44.61	18.92	6.068	4	3	3.118	258
							WT + Wnt3a vs. Lrp6KO (#2)	25.96	9.609 to 42.31	Yes	***	0.0002		WT + Wnt3a vs. Lrp6KO (#2)	63.53	37.57	25.96	6.068	4	3	4.278	258
							12h
							WT + Wnt3a vs. WT + iWnt3a	44.69	28.34 to 61.04	Yes	****	<0.0001		WT + Wnt3a vs. WT + iWnt3a	63.28	18.59	44.69	6.068	4	3	7.364	258
							WT + Wnt3a vs. BKO	30.62	14.27 to 46.97	Yes	****	<0.0001		WT + Wnt3a vs. BKO	63.28	32.66	30.62	6.068	4	3	5.045	258
							WT + Wnt3a vs. Lrp5KO (#1)	7.394	-8.957 to 23.74	No	ns	0.7831		WT + Wnt3a vs. Lrp5KO (#1)	63.28	55.88	7.394	6.068	4	3	1.218	258
							WT + Wnt3a vs. Lrp6KO (#1)	30.76	12.22 to 49.30	Yes	****	<0.0001		WT + Wnt3a vs. Lrp6KO (#1)	63.28	32.52	30.76	6.881	4	2	4.47	258
							WT + Wnt3a vs. Lrp56KO (#1)	31.85	15.50 to 48.20	Yes	****	<0.0001		WT + Wnt3a vs. Lrp56KO (#1)	63.28	31.43	31.85	6.068	4	3	5.248	258
							WT + Wnt3a vs. Lrp5KO (#2)	-6.17	-21.31 to 8.968	No	ns	0.8575		WT + Wnt3a vs. Lrp5KO (#2)	63.28	69.45	-6.17	5.618	4	4	1.098	258
							WT + Wnt3a vs. Lrp56dKO (#2)	18.93	2.577 to 35.28	Yes	*	0.0145		WT + Wnt3a vs. Lrp56dKO (#2)	63.28	44.35	18.93	6.068	4	3	3.119	258
							WT + Wnt3a vs. Lrp6KO (#2)	24.59	8.244 to 40.94	Yes	***	0.0005		WT + Wnt3a vs. Lrp6KO (#2)	63.28	38.68	24.59	6.068	4	3	4.053	258
