# Supplementary material for: Wnt- and glutamate-receptors orchestrate stem cell dynamics and asymmetric cell division
Source: eLife. 2021 May 24;10:e59791. doi: 10.7554/eLife.59791 (PMC8177892; doi:10.7554/eLife.59791)
Supplement: Figure 4—figure supplement 1—source data 1. [file elife-59791-fig4-figsupp1-data1.xlsx]

## Sheet: Figure 4 - Supp 1
time (min)	WT Wnt3a
1	0.996921	0.895533*	0.915716	1.11665	0.82645	0.901927	1.2	0.964764	0.924523	0.84028	0.896584	6.356099*	0.860233	0.58101	0.822192	0.877223	0.852297	0.74759	1	1	0.937751	0.905696	0.902704	0.847674	1.19552	0.676496	1.1	0.791029	1.01737	1	0.540098	0.901263	1.22306	0.847915	0.854695	0.933333	1.023	0.766266	0.600252	0.846372	0.578204	0.827931	0.744208	1.05393	0.890162	0.7632	1.2	1.37575	1.220572*
2	0.998752	1.109823*	0.89479	1.08985	0.906014	0.775724	0.917936	0.933639	0.956606	0.920133	0.757413	1.256335*	1.06888	0.662714	0.853492	0.851352	0.773776	0.629183	1.05896	0.941481	0.882843	0.895881	0.899656	0.876833	1.11967	0.630076	0.661683	0.744084	1.03351	0.691411	0.591359	0.83205	0.890327	0.640495	0.769887	0.872417	0.621697	0.683298	0.631799	0.754247	0.624224	0.827931	0.594692	1.30339	0.823529	0.68083	0.670135	1.27279	1.208305*
3	1.11612	1*	0.896584	1.02975	0.955627	0.875315	0.934574	0.989259	0.904269	0.904989	0.797385	1.08074*	0.699127	0.704664	0.862146	0.851352	0.736501	0.659144	1.14269	0.912785	0.51131	0.514823	0.889913	0.823247	1.07816	0.617069	0.675838	0.759746	0.974281	0.643921	0.591359	0.747895	0.820716	0.534219	0.793612	0.802773	0.627524	0.72897	0.644911	0.754247	0.624224	0.636825	0.529686	1.28442	0.809504	0.662384	0.666667	1.34316	1.293218*
4	1	1.104315*	0.896584	0.971058	0.954641	0.880439	0.943898	0.866499	0.677466	0.861441	0.822766	1.3014*	0.607805	0.693815	0.936103	0.829787	0.730838	0.63174	1.21702	0.912785	0.471405	0.546547	0.887878	0.759152	1.08167	0.63601	0.542326	0.759169	0.89921	0.582772	0.580334	0.874475	0.745356	0.534219	0.837306	0.849837	0.588348	0.742891	0.623783	0.781544	0.761577	0.625844	0.530991	0.813489	0.404304	0.66326	0.642804	1.37575	1.557241*
5	1.12972	0.933809*	0.877942	1.0085	0.881657	0.879855	0.817387	0.861126	0.534196	0.761042	0.900702	1.233048*	0.64718	0.767587	0.958603	0.851449	0.768403	0.661984	1.08675	0.895533	0.578836	0.616131	0.876496	0.759152	1.08167	0.649594	0.620174	0.759169	0.829867	0.574221	0.600592	0.835532	0.745356	0.544059	0.857473	0.838274	0.608276	0.766003	0.624864	0.755295	0.761577	0.653005	0.517136	0.713648	0.238262	0.687131	0.670146	1.54587	1.557241*
6	1.0635	1.117008*	0.880779	0.870455	0.862418	0.909091	0.982377	0.892288	0.802702	0.901044	0.896258	1.247446*	0.672309	0.759077	0.921954	0.795067	0.764175	0.712423	1.08069	0.755858	0.621926	0.816078	0.863651	0.670168	1.08167	0.591414	0.661828	0.706503	0.729539	0.630286	0.600592	0.69701	0.769231	0.533052	0.834456	0.838274	0.591819	0.766003	0.604395	0.824621	0.689809	0.582799	0.486504	0.766652	0.251896	0.660486	0.65202	1.39608	1.465285*
7	1.25623	1.16619*	0.871813	0.867302	0.905539	0.892288	0.983646	0.863263	0.504819	0.914934	0.924686	1.015445*	0.660207	0.741333	0.856706	0.535793	0.773591	0.786407	0.905663	0.775747	0.660303	0.901044	0.863651	0.592476	1.08167	0.629659	0.75357	0.665136	0.700809	0.653047	0.620911	0.72794	0.730081	0.542109	0.777903	0.849528	0.564604	0.815579	0.616134	0.879757	0.562126	0.564756	0.473776	0.766652	0.217959	0.67082	0.667019	1.26189	1.414214*
8	1.11667	1.38675*	0.853237	0.824621	0.766965	0.891651	0.814769	0.885577	0.478804	0.861441	0.914443	1.013699*	0.611751	0.758082	0.889852	0.518792	0.807391	0.781243	0.894427	0.77557	0.667007	0.910832	0.893765	0.580996	1.1767	0.666667	0.740062	0.619644	0.720096	0.70473	0.657071	0.606407	0.761042	0.525689	0.799803	0.730129	0.544925	0.836967	0.624129	0.820529	0.542326	0.54139	0.524685	0.488597	0.233052	0.566205	0.687249	1.35086	1.479419*
9	1.12318	1.205401*	0.860005	0.802225	0.877229	0.844894	0.819232	0.726722	0.531893	0.746577	0.878958	1.05731*	0.632135	0.740618	0.821695	0.526481	0.79938	0.73713	0.885316	0.771162	0.766965	0.891415	0.902593	0.637444	0.91214	0.656049	0.827415	0.608328	0.674125	0.605293	0.676496	0.474045	0.684748	0.53891	0.777586	0.533734	0.613221	0.794051	0.624129	0.820529	0.464474	0.465847	0.626894	0.457615	0.343818	0.563944	0.674115	1.49207	1.666667*
10	1.27111	1.020103*	0.87075	1.15372	0.632456	0.837061	0.810408	0.824621	0.590692	0.630509	0.847924	0.910527*	0.653138	0.769338	0.883072	0.497393	0.739991	0.726262	1.1118	0.769203	0.565233	0.898877	0.903383	0.596862	0.734025	0.703477	0.818342	0.592749	0.733763	0.578655	0.73667	0.478566	0.777029	0.521593	0.76118	0.511666	0.567689	0.815579	0.665693	0.672673	0.356235	0.464238	0.583006	0.450266	0.443876	0.584103	0.72421	1.22729	1.607907*
11	1.20471	0.772862*	0.955459	0.977802	0.921777	0.823895	0.869171	0.79185	0.812085	0.592749	0.807728	0.790569*	0.625039	0.74407	0.79421	0.495261	0.741349	0.690698	0.809239	0.684855	0.565233	0.720607	0.911544	0.647388	0.711934	0.730842	0.795285	0.592749	0.655446	0.674949	0.740569	0.478566	0.734452	0.520937	0.783076	0.545031	0.531499	0.821142	0.680568	0.835183	0.449333	0.428746	0.567331	0.494975	0.450606	0.602823	0.658216	0.642161	1.334166*
12	1.18484	0.776493*	0.927656	0.919239	0.942809	0.838756	0.892577	0.802773	0.783402	0.5696	0.70507	1*	0.618372	0.570251	0.769453	0.519875	0.62922	0.686702	0.8	0.664033	0.556407	0.756637	0.890767	0.648242	0.711934	0.775837	0.802702	0.592749	0.667237	0.792742	0.714565	0.546781	0.783076	0.460921	0.761391	0.534074	0.509831	0.833447	0.666522	0.751665	0.501778	0.421133	0.552472	0.465715	0.456204	0.628168	0.637115	0.766965	1.612452*
13	1.46961	0.747475*	0.913082	0.830455	1.05975	0.768295	0.860588	0.877058	0.894427	0.685232	0.718347	1.134717*	0.595228	0.493733	0.824621	0.557062	0.639406	0.724286	0.733333	0.658966	0.556011	0.870855	0.871538	0.630286	0.699903	0.895638	0.802702	0.592825	0.705747	0.729964	0.624837	0.523053	1.04271	0.392232	0.727085	0.534074	0.501659	0.80307	0.647036	0.632456	0.501778	0.386534	0.571429	0.403916	0.433861	0.470679	0.649228	0.737564	1.414214*
14	1.25671	0.956606*	0.90232	0.669534	1.07088	0.766965	0.841085	0.877058	0.989652	0.658486	0.721399	1.173231*	0.542449	0.460535	0.824621	0.597851	0.594635	0.627572	0.623267	0.689057	0.544059	0.843649	0.851526	0.512074	0.75271	0.866758	0.860026	0.588676	0.456361	0.583938	0.6	0.521247	1.0621	0.435693	0.745437	0.549557	0.481372	0.757924	0.63957	0.620174	0.538516	0.424508	0.571064	0.571223	0.416409	0.407777	0.646902	0.681115	1.414214*
15	1.22015	1*	0.864536	0.968688	1.07088	0.823217	0.648476	0.824621	0.982757	0.563257	0.759683	1.067112*	0.534621	0.444699	0.904989	0.523997	0.567521	0.627694	0.552866	0.686517	0.573488	0.922292	0.831953	0.497159	0.833284	0.965584	0.849837	0.647015	0.460977	0.573121	0.546598	0.592043	0.863134	0.448653	0.73775	0.549557	0.402965	0.855628	0.60894	0.659254	0.562492	0.45675	0.662809	0.580201	0.39293	0.40919	0.655379	0.707107	1.66091*
16	1.18028	1.151086*	0.87608	0.943669	0.879615	0.932325	0.634524	0.838941	0.98479	0.565685	0.770068	1.076487*	0.525088	0.536602	0.946059	0.552797	0.544277	0.632456	0.50291	0.729964	0.567258	0.876148	0.859835	0.444825	0.910014	0.886514	0.849837	0.642605	0.466936	0.606092	0.511408	0.576701	0.901388	0.443604	0.714052	0.582772	0.374766	1.04037	0.60894	0.746788	0.518686	0.498273	0.605121	0.512759	0.380648	0.395925	0.649001	0.666667	1.497124*
17	1.16301	1.230325*	0.826704	0.713874	0.924129	0.588397	0.568152	0.737643	0.994214	0.449913	0.782154	1.274506*	0.514986	0.581482	0.905539	0.535997	0.527148	0.528655	0.734726	0.739124	0.592749	0.460977	0.858188	0.461644	0.854358	1.1326	0.863911	0.583808	0.460513	0.643921	0.493865	0.654384	0.745822	0.409986	0.731882	0.614295	0.287093	1.15577	0.608121	0.858619	0.587518	0.408807	0.728357	0.634589	0.39293	0.357691	0.623918	0.65192	1.617914*
18	1.16619	1.213352*	0.845385	0.693375	0.938966	0.676422	0.600925	0.676028	0.990521	0.463335	0.796301	1.044302*	0.53019	0.618347	0.856173	0.537368	0.571429	0.498893	0.662589	0.753446	0.620174	0.4287	0.867222	0.389393	0.777227	0.879337	0.93581	0.576759	0.47318	0.849677	0.486707	0.623509	0.752914	0.392232	0.768738	0.556268	0.282958	1.20975	0.608509	0.874475	0.587518	0.386248	0.766965	0.559017	0.435917	0.357691	0.616891	0.621982	1.612452*
19	1.20588	1.070507*	0.8244	0.723241	0.815295	0.69098	0.647937	0.621926	1	0.40196	0.847486	1.021324*	0.516864	0.645193	0.847486	0.516246	0.610873	0.428298	0.532769	0.760406	0.594803	0.351581	0.857954	0.375222	0.728431	0.914566	0.860026	0.576759	0.451539	0.86177	0.524298	0.637327	0.882843	0.301105	0.742392	0.6027	0.272268	0.960208	0.574338	0.853957	0.588348	0.281942	0.632456	0.52791	0.46428	0.346283	0.597863	0.624264	1.561738*
20	1.14354	1.070507*	0.843793	1.05985	0.79603	0.5221	0.641893	0.729923	0.965146	0.447214	0.87933	1.010292*	0.465932	0.615347	0.840941	0.563397	0.640824	0.51984	0.598849	0.718898	0.575396	0.357666	0.857954	0.410108	0.707107	0.780811	0.813892	0.552361	0.501294	0.921954	0.557138	0.517821	1.03362	0.304047	0.728477	0.6027	0.326404	0.937906	0.564041	0.817233	0.606339	0.270172	0.629858	0.637377	0.476037	0.415669	0.597041	0.673046	1.955385*
21	1.29363	1*	0.889574	0.862044	1.20416	0.562352	0.628311	0.732084	1.14543	0.435262	0.814916	1.010292*	0.539227	0.561899	0.946594	0.54748	0.544218	0.608121	0.58712	0.743158	0.603583	0.728869	0.839712	0.423299	0.876863	0.737564	0.820716	0.530171	0.790133	0.837171	0.561872	0.51951	1.02657	0.328457	0.677834	0.57594	0.373243	1.0605	0.55253	0.792465	0.673615	0.281942	0.71586	0.765641	0.436539	0.416231	0.575637	0.707107	2.065116*
22	1.28062	0.384615*	0.899455	0.835629	1.08278	0.562352	0.642063	0.760286	0.923287	0.46236	0.75873	1*	0.538456	0.589034	0.896908	0.50985	0.563093	0.639406	0.58712	0.743158	0.686406	1.31115	0.815905	0.423299	0.815711	0.726	0.810341	0.542326	0.819973	0.837171	0.591481	0.537603	0.873434	0.328457	0.662437	0.61808	0.441826	1.15818	0.662722	0.718033	0.685588	0.233603	0.695701	0.849837	0.350823	0.412955	0.565093	0.707107	1.323987*
23	1.29472	0.666667*	0.893908	0.427179	1.09179	0.537218	0.661172	0.776728	0.914835	0.47794	0.735215	1.121883*	0.731709	0.612481	0.951303	0.495646	0.554258	0.719791	0.552074	0.727607	0.600851	0.956299	0.797816	0.460327	0.839877	0.773897	1.02369	0.550803	0.868243	0.837171	0.624812	0.419882	0.64744	0.328457	0.667982	0.545667	0.423704	0.995778	0.682642	0.53641	0.75561	0.192205	0.632456	0.754474	0.354645	0.430441	0.560109	0.70473	1.514037*
24	1.4203	0.318626*	0.898016	0.46225	1.00957	0.479353	0.457615	0.687184	0.882819	0.47794	0.751485	1.068393*	0.849837	0.612481	0.946594	0.534297	0.594348	0.604826	0.545031	0.747763	0.656228	0.982931	0.826095	0.471584	0.837404	0.773897	0.877058	0.529745	0.876309	0.921954	0.644915	0.342017	0.532397	0.346546	0.669445	0.455922	0.417956	0.881024	0.664441	0.545491	0.706197	0.192205	0.579741	0.717252	0.478913	0.286299	0.560565	0.713831	2.418677*
25	1.31607	0.298398*	0.897006	0.481664	0.96212	0.533134	0.501668	0.443319	0.789844	0.444783	0.713442	1.40504*	0.868966	0.612481	0.881376	0.478428	0.563115	0.604826	0.760345	0.714173	0.720876	0.780869	0.79783	0.471584	0.730129	0.75817	0.877058	0.519685	0.870855	1.3153	0.635534	0.288435	0.408669	0.327926	0.660796	0.30904	0.40853	0.87073	0.682448	0.562352	0.76053	0.217571	0.457604	0.671762	0.341432	0.294484	0.557319	0.707107	2.773501*
26	1.42775	0.326431*	0.882094	0.700404	1.02722	0.491246	0.412461	0.430721	0.826732	0.394819	0.761033	1.255055*	0.921208	0.684257	0.946594	0.238514	0.526308	0.571327	0.674822	0.65428	0.753309	0.767869	0.822632	0.400409	0.782304	0.77079	0.75695	0.498682	0.862204	1.19293	0.62482	0.258432	0.428086	0.364216	0.676422	0.30904	0.390402	0.875545	0.658577	0.542326	0.764078	0.209253	0.419058	0.642063	0.32	0.296776	0.560565	0.73667	1.923538*
27	1.15188	0.219265*	0.88503	0.583095	0.948091	0.451842	0.297482	0.353553	0.9362	0.384615	0.910475	1.38028*	0.963843	0.685011	0.940291	0.159964	0.526308	0.699284	0.639406	0.550685	0.737425	0.773067	0.827986	0.367912	0.7432	0.89946	0.73667	0.506663	0.829269	1.20221	0.590757	0.258432	0.588348	0.319438	0.654808	0.493865	0.412549	0.905643	0.637355	0.519875	0.73122	0.217571	0.318386	0.599263	0.314778	0.296776	0.574253	0.714384	1.746425*
28	1.20568	0.137361*	0.811914	0.640184	0.921221	0.420539	0.297482	0.399353	0.9362	0.431626	0.804288	1.131923*	0.928477	0.697486	0.856173	0.12438	0.565025	0.699127	0.536739	0.537149	0.707107	0.629317	0.826706	0.367912	0.874475	0.857331	0.784465	0.608745	0.831253	0.956996	0.525837	0.326327	0.606439	0.328339	0.632456	0.494975	0.412549	0.905643	0.651164	0.474045	0.700511	0.23118	0.212275	0.514782	0.285549	0.321566	0.509162	0.707107	1.475287*
29	1.22592	0.196116*	0.719317	0.694516	0.983352	0.47737	0.280362	0.291969	0.82382	0.341642	0.808608	1.038068*	1.03227	0.670898	0.848528	0.693375	0.609298	0.684211	0.535997	0.560881	0.642529	0.596464	0.837404	0.312842	0.874475	0.810032	0.732743	0.586676	0.847715	0.874643	0.490335	0.326327	0.480233	0.328339	0.58228	0.538516	0.394515	0.937218	0.666667	0.509902	0.62867	0.217571	0.287754	0.400276	0.372374	0.356882	0.466532	0.740797	1.455214*
30	1.24853	0.206725*	0.678427	0.54853	0.949968	0.51561	0.330409	0.271964	0.986486	0.389409	0.851469	1*	0.894427	0.752009	0.679511	0.447214	0.577764	0.565217	0.535997	0.56754	0.709558	0.808608	0.833357	0.312842	0.800087	0.704375	0.970143	0.55318	0.896739	0.874643	0.5166	0.268328	0.460223	0.329884	0.560412	0.47794	0.376222	0.937218	0.680617	0.533333	0.635264	0.226274	0.328798	0.353553	0.333061	0.362143	0.450704	0.635071	1.313064*
31	1.35567	0.263117*	0.677656	0.620174	0.883452	0.485643	0.373815	0.308805	0.819836	0.316228	0.854174	1.063589*	0.963328	0.707107	0.73122	0.630286	0.638069	0.48	0.55073	0.486453	0.707107	0.677834	0.827954	0.312842	0.629858	0.681029	0.766965	0.467726	0.898998	1.05463	0.535627	0.223607	0.442975	0.304855	0.559181	0.47794	0.386425	0.894427	0.657955	0.56378	0.65192	0.2	0.263416	0.342997	0.383986	0.404888	0.491918	0.749359	1.295857*
32	1.16359	0.316228*	0.684383	0.640312	0.829867	0.467449	0.445164	0.326357	0.876616	0.296788	0.853584	1.236497*	0.943349	0.715164	0.754474	0.58722	0.624602	0.482904	0.519875	0.472208	0.715061	0.620174	0.820327	0.330305	0.727607	0.543214	0.732642	0.440276	0.883618	1.07175	0.594643	0.225189	0.418638	0.314845	0.51561	0.53296	0.402272	0.854598	0.657955	0.596795	0.560839	0.199314	0.25862	0.383677	0.388574	0.426275	0.50153	0.684855	1.627467*
33	1.10262	0.223607*	0.630286	0.707107	0.89881	0.456108	0.437237	0.459718	0.941386	0.371391	0.846372	1.107965*	0.757604	0.72938	0.768801	0.525226	0.626686	0.465361	0.478566	0.471463	0.747934	0.495261	0.819403	0.347048	0.795285	0.494354	0.707107	0.436926	0.824469	1.07175	0.614112	0.230822	0.443393	0.314845	0.510373	0.635071	0.448602	0.818598	0.643017	0.630286	0.573282	0.207719	0.242313	0.282843	0.367607	0.275208	0.484126	0.684855	1.627467*
34	0.885316	0.38208*	0.578402	0.651153	0.747322	0.487628	0.542326	0.447741	0.895045	0.403113	0.854794	1.07861*	0.558539	0.732497	0.737643	0.374766	0.553066	0.464474	0.407411	0.418034	0.620174	0.376288	0.840381	0.389077	0.808608	0.462464	0.707107	0.430055	0.839613	0.909137	0.574187	0.228035	0.557367	0.350901	0.510373	0.646956	0.448602	0.782154	0.643017	0.600245	0.573282	0.20937	0.227626	0.180775	0.350202	0.295378	0.409914	0.532152	1.83829*
35	0.624812	0.519875*	0.42683	0.614295	0.808608	0.70195	0.563093	0.400471	0.899662	0.403113	0.910227	1.052667*	0.461644	0.742288	0.638704	0.392232	0.515296	0.383986	0.470767	0.434732	0.644465	0.353553	0.818725	0.366397	0.931822	0.452679	0.793291	0.472472	0.902119	0.982194	0.57629	0.265945	0.584505	0.439669	0.493511	0.644772	0.409055	0.791769	0.620844	0.593883	0.53897	0.261891	0.318068	0.310087	0.317049	0.334767	0.419609	0.66519	1.584649*
36	0.712262	0.445679*	0.334331	0.434372	0.826898	0.504929	0.580334	0.360555	0.810005	0.333333	1.12454	1.060119*	0.574412	0.652836	0.53324	0.392232	0.544257	0.415511	0.632456	0.409616	0.626387	0.54037	0.834611	0.310087	0.916309	0.452679	0.859566	0.472881	0.943715	0.959351	0.583915	0.254916	0.489055	0.441422	0.491124	0.654384	0.388426	0.814724	0.598671	0.593883	0.578092	0.257248	0.345814	0.333333	0.289101	0.322685	0.424201	0.65372	1.474136*
37	0.91214	0.32249*	0.341895	0.412082	0.814801	0.52234	0.580334	0.417448	0.858465	0.352261	1.05863	1.079724*	0.787679	0.609131	0.409006	0.342997	0.595954	0.543807	0.628587	0.422159	0.694996	0.511408	0.858585	0.275467	0.868744	0.388309	0.859566	0.4479	0.888912	0.901388	0.515861	0.254916	0.378899	0.317388	0.457638	0.630286	0.420569	0.84385	0.623016	0.572598	0.646946	0.281872	0.315165	0.342997	0.311925	0.354887	0.436863	0.529999	1.490712*
38	0.747322	0.32249*	0.313006	0.470767	0.872172	0.535997	0.643921	0.342997	0.856173	0.307692	0.82382	1.038133*	0.856706	0.75199	0.447214	0.386769	0.595954	0.547056	0.632456	0.404226	0.672309	0.438529	0.835106	0.265635	0.868744	0.472399	0.724102	0.435565	0.924174	0.946864	0.486615	0.362215	0.405025	0.292052	0.425957	0.66564	0.447214	0.903877	0.598348	0.547997	0.646946	0.258008	0.315165	0.395925	0.319438	0.447214	0.431174	0.599625	1.490712*
39	0.720189	0.287348*	0.319648	0.581016	0.868744	0.432135	0.628168	0.356131	0.80727	0.323381	0.772539	0.961004*	1.08653	0.754411	0.449069	0.452679	0.579163	0.547056	0.588235	0.395856	0.624224	0.262613	0.845375	0.265635	0.814801	0.517287	0.628932	0.432116	0.924313	0.831028	0.462025	0.387869	0.4701	0.284515	0.404304	0.645277	0.429604	0.950014	0.586728	0.582686	0.659555	0.258008	0.320193	0.232495	0.327132	0.515079	0.37528	0.529999	1.424001*
40	0.860026	0.25*	0.301791	0.454077	0.849677	0.549303	0.719925	0.430116	0.764375	0.387671	0.875545	0.805536*	0.809239	0.707107	0.380173	0.454077	0.599019	0.595325	0.591169	0.372943	0.600851	0.265954	0.852916	0.246126	0.796778	0.423435	0.628932	0.442256	0.910446	0.780869	0.462716	0.387869	0.47375	0.301196	0.389936	0.623267	0.396644	0.853957	0.598348	0.647834	0.700511	0.279797	0.337468	0.181071	0.338811	0.592749	0.37528	0.542326	1.392839*
41	0.606339	0.387671*	0.286063	0.418638	0.911845	0.669742	0.707107	0.430116	0.764375	0.304114	0.895045	0.824163*	0.802773	0.645193	0.392402	0.350059	0.660153	0.661146	0.585206	0.423306	0.607524	0.333333	0.870561	0.246126	0.993884	0.406846	0.73667	0.407189	0.961459	0.945413	0.462716	0.422716	0.438529	0.319776	0.374648	0.673905	0.396644	0.864073	0.578153	0.617395	0.700404	0.293759	0.275705	0.447214	0.35418	0.633431	0.392756	0.613572	1.2216*
42	0.644157	0.240424*	0.273002	0.5	0.817387	0.688468	0.707107	0.342997	0.804936	0.304114	0.953642	0.937681*	0.820458	0.621295	0.37117	0.383482	0.735943	0.73667	0.401977	0.407824	0.607524	0.355317	0.905261	0.258778	0.883452	0.360555	0.806226	0.372001	0.930617	1.01242	0.493024	0.432023	0.478428	0.321252	0.421468	0.631055	0.414404	0.7879	0.548422	0.509902	0.741302	0.286299	0.261488	0.447214	0.381949	0.684811	0.393942	0.613572	1.248529*
43	0.64766	0.339182*	0.336713	0.566352	0.89881	0.690355	0.651153	0.426973	0.665355	0.303137	0.894427	1.154006*	0.77746	0.658884	0.37117	0.383482	0.787599	0.711068	0.353112	0.427383	0.596795	0.358979	0.893916	0.292933	0.895533	0.362599	0.614295	0.341063	0.930617	0.948683	0.496139	0.500819	0.397483	0.350901	0.402468	0.568339	0.447214	0.809008	0.5394	0.575853	0.660546	0.310597	0.261488	0.507371	0.393164	0.664364	0.397517	0.694516	1.1094*
44	0.749775	0.32906*	0.30591	0.606339	0.849837	0.697486	0.589015	0.468051	0.714397	0.341231	0.868145	1.118034*	0.693375	0.689576	0.401876	0.341243	0.749882	0.675463	0.407411	0.440977	0.565233	0.306804	0.866647	0.277185	0.905357	0.335855	0.707107	0.37687	0.918667	0.996639	0.538462	0.493197	0.397483	0.3468	0.434925	0.484266	0.457459	0.813733	0.531737	0.5547	0.621926	0.344234	0.28913	0.545455	0.438894	0.624695	0.411214	0.646813	1.123182*
45	0.632456	0.185695*	0.350551	0.542326	0.812794	0.669534	0.591969	0.468051	0.769309	0.367035	0.86859	0.996639*	0.623783	0.658884	0.463251	0.352544	0.540729	0.740233	0.390405	0.622414	0.542326	0.345666	0.864911	0.179107	0.681175	0.340344	0.830455	0.37687	0.966216	0.894427	0.546608	0.496139	0.419137	0.324558	0.408472	0.503264	0.373837	0.883788	0.520235	0.599051	0.607074	0.357666	0.271163	0.441129	0.475064	0.546608	0.423735	0.677631	1.140175*
46	0.700404	0.640312*	0.341068	0.373288	0.787343	0.652863	0.511025	0.448535	0.63926	0.406946	0.893121	1.030776*	0.623267	0.658898	0.585829	0.39524	0.544874	0.869757	0.342017	0.609837	0.523303	0.345666	0.873325	0.18158	0.667947	0.394696	0.58722	0.382699	0.944034	0.990521	0.546608	0.463428	0.494906	0.295834	0.385741	0.503264	0.337173	0.836164	0.520235	0.615385	0.632456	0.331357	0.297786	0.409171	0.475064	0.568481	0.426092	0.631055	1.470429*
47	0.883883	0.237023*	0.30591	0.363636	0.7786	0.641999	0.542326	0.406971	0.667491	0.504754	0.890162	1*	0.626894	0.700739	0.586615	0.40679	0.5826	0.708623	0.240559	0.796514	0.535969	0.372516	0.904208	0.200852	0.650659	0.434613	0.58722	0.408601	0.921458	0.874475	0.645077	0.476283	0.481887	0.30265	0.375	0.518686	0.361027	0.854598	0.499459	0.575853	0.640312	0.372174	0.335385	0.450627	0.445578	0.413023	0.422758	0.709541	1.404626*
48	0.825379	0.141421*	0.327253	0.452679	0.806226	0.682793	0.639841	0.378475	0.707107	0.30637	0.82382	1*	0.441081	0.70333	0.371391	0.322703	0.591482	0.737564	0.231032	0.906619	0.434414	0.410191	0.91589	0.224559	0.650659	0.528525	0.555556	0.403635	0.93551	0.874475	0.645077	0.436208	0.481887	0.331309	0.406228	0.558359	0.314087	0.829241	0.466963	0.612901	0.666667	0.359635	0.341231	0.502588	0.468165	0.366372	0.43055	0.709541	1.238742*
49	0.838274	0.133038*	0.273002	0.45607	0.719816	0.682793	0.639841	0.289742	0.610973	0.350348	0.712581	1.221945*	0.391077	0.70333	0.34979	0.279269	0.540097	0.779813	0.209073	0.882094	0.507174	0.431615	0.908549	0.220843	0.691034	0.428811	0.666667	0.403635	0.916139	0.874475	0.654946	0.445914	0.468609	0.334718	0.356659	0.525226	0.292958	0.808608	0.455867	0.620174	0.659555	0.357436	0.322233	0.64748	0.489211	0.366372	0.428086	0.684855	1.238742*
50	0.821995	0.171499*	0.2758	0.45607	0.746954	0.69778	0.549063	0.318174	0.636652	0.180775	0.70443	1.100505*	0.486504	0.649668	0.420703	0.268844	0.569244	0.780811	0.172054	0.83205	0.530252	0.447214	0.939907	0.249264	0.813941	0.473909	0.704664	0.401827	0.949661	0.833333	0.544285	0.445914	0.484414	0.333333	0.380596	0.527046	0.352261	0.816901	0.455264	0.63625	0.659555	0.397151	0.367912	0.585071	0.434372	0.366372	0.437178	0.789893	1.079066*
51	0.907923	0.149071*	0.270529	0.552978	0.677285	0.675838	0.451466	0.31427	0.708155	0.124035	0.77658	0.976795*	0.509902	0.640459	0.447214	0.353358	0.594348	0.708676	0.168965	0.947511	0.540833	0.402566	0.941077	0.2717	0.729756	0.524854	0.808608	0.436084	0.961898	0.790569	0.554816	0.430273	0.5	0.403719	0.41599	0.447214	0.340355	0.808608	0.456337	0.599051	0.659555	0.38208	0.345898	0.638508	0.355181	0.413023	0.440563	0.789893	1.106797*
52	0.821995	0.151446*	0.278006	0.563093	0.686406	0.685832	0.482573	0.317999	0.690742	0.124035	0.731709	1.470871*	0.430083	0.631364	0.485071	0.403635	0.571429	0.696526	0.184289	0.946594	0.563093	0.417136	0.898505	0.276058	0.763015	0.513509	0.819232	0.436084	0.908366	0.909959	0.598421	0.337731	0.484414	0.444942	0.41599	0.447214	0.340355	0.811929	0.445901	0.653047	0.710363	0.343872	0.358695	0.506019	0.316228	0.455251	0.437178	0.761577	1.697056*
53	0.806226	0.196116*	0.298903	0.6	0.5	0.68413	0.493964	0.208969	0.618604	0.212091	0.711068	1*	0.52791	0.618117	0.485071	0.381314	0.534919	0.696526	0.130856	0.995037	0.581507	0.620174	0.918955	0.219054	0.787679	0.511408	0.766965	0.453146	0.920447	0.894427	0.692465	0.345937	0.484414	0.406228	0.412082	0.461774	0.351799	0.622816	0.425678	0.659618	0.667947	0.372104	0.346342	0.459426	0.308043	0.493197	0.418317	0.789893	1.56205*
54	0.877058	0.32686*	0.308043	0.592043	0.618347	0.634749	0.46592	0.197257	0.700696	0.209568	0.773654	1*	0.536656	0.620416	0.42357	0.639841	0.523984	0.696526	0.150627	0.947511	0.695321	0.578147	0.928984	0.231879	0.737564	0.482603	0.829599	0.421637	0.904871	0.990521	0.684105	0.360927	0.468609	0.421302	0.43453	0.353553	0.348194	0.640184	0.425678	0.567258	0.691034	0.413449	0.371853	0.563557	0.343872	0.357042	0.408278	0.707107	1.843909*
55	0.682504	0.2*	0.355127	0.5	0.681115	0.6025	0.643921	0.216799	0.754474	0.299425	0.794512	0.955779*	0.621926	0.629557	0.5	0.345349	0.566903	0.519875	0.145034	1	0.749656	0.599092	0.939642	0.239374	0.72111	0.444783	0.766965	0.421637	0.915483	1.03807	0.64991	0.360927	0.457753	0.421302	0.466376	0.337778	0.311823	0.723241	0.404449	0.538149	0.711068	0.454794	0.371853	0.392232	0.383986	0.408773	0.394676	0.707107	1.823055*
56	0.620174	0.298142*	0.347079	0.404888	0.454077	0.612962	0.643921	0.246932	0.766965	0.194257	0.803882	1.274755*	0.292353	0.58121	0.476199	0.27735	0.571343	0.346688	0.150627	0.917379	0.578655	0.61808	0.950071	0.221491	0.707107	0.634776	0.68654	0.421637	0.93484	1.07088	0.691621	0.354532	0.443257	0.401864	0.457075	0.337778	0.303661	0.698041	0.403434	0.607299	0.664087	0.517821	0.261712	0.339887	0.389647	0.427299	0.39175	0.682461	1.823055*
57	0.688991	0.235702*	0.336959	0.447214	0.546781	0.640312	0.641179	0.249308	0.690742	0.25328	0.78903	1.172962*	0.632456	0.592043	0.574696	0.451243	0.523352	0.394922	0.175692	1.09895	0.673146	0.584313	0.960589	0.228489	0.684257	0.50556	0.68654	0.401947	0.917267	0.955201	0.734726	0.360407	0.373363	0.366003	0.457075	0.484371	0.307148	0.660009	0.390475	0.607299	0.61808	0.444028	0.171796	0.516864	0.540343	0.419137	0.388735	0.707107	1.38067*
58	0.688991	0.454077*	0.336959	0.419137	0.657596	0.670075	0.582623	0.254951	0.688512	0.224662	0.754474	1.02774*	0.626099	0.612493	0.582623	0.357042	0.60461	0.519067	0.080635	1.11708	0.633431	0.555267	0.960589	0.27903	0.687184	0.485071	0.711934	0.372275	0.939287	0.925292	0.470463	0.347363	0.374657	0.366003	0.466565	0.572218	0.302171	0.682793	0.382201	0.575423	0.62867	0.405016	0.233952	0.529877	0.531243	0.439669	0.399043	0.729756	1.280625*
59	0.613631	0.29361*	0.329234	0.242536	0.667049	0.663981	0.549582	0.216137	0.588562	0.177611	0.868243	0.983352*	0.609837	0.600894	0.632456	0.224267	0.584103	0.659768	0.124035	1.16619	0.596464	0.518344	0.951185	0.283103	0.825379	0.325396	0.632456	0.374664	0.960846	1	0.599019	0.347363	0.395678	0.366003	0.475499	0.568458	0.315187	0.69778	0.361592	0.450377	0.632456	0.333333	0.212459	0.465109	0.372033	0.447214	0.406864	0.657231	1.382666*
60	0.601329	0.29361*	0.340202	0.342997	0.784639	0.669208	0.677285	0.24394	0.651795	0.242956	0.860013	1.038161*	0.567646	0.647743	0.524493	0.224267	0.596795	0.772862	0.095783	1.04597	0.528176	0.45675	0.931945	0.288006	0.757132	0.197546	0.632456	0.368703	0.960846	0.925292	0.552268	0.353553	0.410264	0.393357	0.473503	0.475059	0.292342	0.701646	0.347498	0.431131	0.594692	0.290619	0.306282	0.415227	0.35477	0.447214	0.397166	0.728869	1.382666*
61	0.632892	0.27735*	0.307822	0.694516	0.831865	0.626207	0.857493	0.269386	0.65428	0.235702	0.675838	1.092975*	0.760117	0.660043	0.618041	0.220863	0.692465	0.6936	0.153185	0.913215	0.600812	0.560978	0.869628	0.288006	0.785136	0.189618	0.691333	0.380214	0.960846	0.892288	0.5	0.503413	0.391077	0.397628	0.474321	0.358216	0.324706	0.672118	0.347498	0.370241	0.607074	0.27929	0.304061	0.415227	0.394922	0.471988	0.382989	0.709196	1.227144*
62	0.7	0.394922*	0.307822	1	0.830455	0.725997	0.819232	0.222142	0.623326	0.231577	0.876795	0.91754*	0.687184	0.570173	0.63895	0.255281	0.749843	0.553066	0.1676	1.057	0.603992	0.53324	0.895762	0.256632	0.729756	0.189618	0.819232	0.419201	1.02146	0.800735	0.535244	0.524442	0.444783	0.387671	0.502129	0.239838	0.368294	0.657149	0.356161	0.463692	0.608229	0.280828	0.393341	0.376116	0.465041	0.503077	0.377237	0.833227	1.334166*
63	0.454077	0.400471*	0.330941	1.1327	0.760767	0.695335	0.830075	0.228709	0.699284	0.22166	0.859835	0.839877*	0.75	0.613572	0.624695	0.253365	0.782154	0.53033	0.210755	1.125	0.614636	0.50556	0.869035	0.241627	0.704521	0.10185	0.830075	0.363354	1.02146	0.857493	0.5	0.552082	0.527046	0.382295	0.501356	0.239838	0.389286	0.657149	0.372416	0.447214	0.64736	0.299211	0.383482	0.321081	0.486011	0.561591	0.396691	0.833227	1.30384*
64	0.439384	0.372678*	0.341642	1	0.767575	0.561479	0.765641	0.193139	0.707971	0.240285	0.821695	0.7526*	0.613424	0.60547	0.506897	0.242536	0.754893	0.615699	0.242536	1.05642	0.614636	0.437237	0.869035	0.252573	0.809938	0.06704	0.883452	0.324715	1.02101	0.907306	0.5	0.448864	0.58722	0.380568	0.564722	0.239838	0.458778	0.657149	0.349234	0.447214	0.620174	0.311846	0.393341	0.384615	0.473432	0.590757	0.391268	0.833227	1.790498*
65	0.468778	0.296319*	0.360925	0.642161	0.498319	0.573698	0.666667	0.202031	0.728357	0.233635	0.76516	0.802773*	0.651153	0.610737	0.47978	0.20905	0.754893	0.626013	0.21511	1	0.632456	0.393376	0.885914	0.286108	0.686803	0.138675	0.883883	0.306317	1.02101	0.907306	0.543368	0.396379	0.645267	0.350994	0.535779	0.239838	0.487988	0.687767	0.34452	0.429584	0.641223	0.311846	0.399343	0.413803	0.478913	0.580531	0.398188	0.639841	1.626978*
66	0.632892	0.251823*	0.370085	0.659768	0.47775	0.561479	0.690335	0.100707	0.700908	0.107459	0.656591	0.869227*	0.738203	0.620174	0.491565	0.231505	0.754893	0.67082	0.185695	1.04644	0.629557	0.43351	0.908159	0.269883	0.762362	0.136646	0.798228	0.341063	1.0669	0.907306	0.543368	0.396379	0.691051	0.350994	0.478556	0.282216	0.507371	0.751037	0.328721	0.413283	0.569976	0.318465	0.458689	0.372678	0.478913	0.6	0.392795	0.714286	1.308258*
67	0.708329	0.351799*	0.338388	0.412311	0.460653	0.52791	0.675863	0.09245	0.665912	0.195538	0.687874	0.795285*	0.729756	0.604424	0.549527	0.248929	0.858479	0.601657	0.185695	1.05075	0.598421	0.5	0.935546	0.272187	0.75519	0.239637	0.685004	0.284099	1.06621	1.05176	0.543368	0.430178	0.65911	0.355127	0.522986	0.239838	0.440595	0.594692	0.350782	0.413283	0.608229	0.304855	0.50291	0.414243	0.48719	0.592655	0.364463	0.714286	1.129541*
68	0.766965	0.420703*	0.353724	0.507371	0.460653	0.52791	0.662589	0.142214	0.666667	0.203888	0.598397	0.767112*	0.669534	0.616623	0.58722	0.288511	0.666667	0.517727	0.154074	1	0.5752	0.459824	0.935546	0.276394	0.775738	0.149906	0.744208	0.255955	0.891522	0.980581	0.556736	0.477171	0.661828	0.339824	0.511194	0.256885	0.543045	0.659555	0.325581	0.4148	0.54748	0.262247	0.47036	0.366088	0.503625	0.549527	0.364463	0.657596	1.278521*
69	0.784465	0.5*	0.359635	0.523424	0.450464	0.472493	0.62385	0.242536	0.699284	0.188795	0.598397	0.826898*	0.620174	0.61876	0.782154	0.302027	0.618206	0.4159	0.210352	1.08643	0.58722	0.383815	0.848554	0.257351	0.684855	0.149906	0.760345	0.257513	0.886923	1	0.503077	0.515901	0.449977	0.387671	0.518175	0.316228	0.526355	0.73199	0.31035	0.4148	0.582686	0.313868	0.357192	0.366088	0.503625	0.588348	0.375549	0.525226	1.697056*
70	0.888625	0.529999*	0.340143	0.493197	0.450464	0.428003	0.609878	0.236716	0.741944	0.144038	0.583309	0.944327*	0.607332	0.60547	0.565685	0.276414	0.543653	0.506211	0.297482	1.09503	0.603949	0.447214	0.872253	0.274265	0.867302	0.106	0.827415	0.27374	0.982034	0.910642	0.494612	0.515901	0.430007	0.389695	0.486645	0.316228	0.466697	0.67873	0.312811	0.395693	0.563397	0.340939	0.35781	0.366088	0.450694	0.600788	0.330316	0.558504	1.697056*
71	0.882786	0.566352*	0.340143	0.581238	0.463007	0.432135	0.685283	0.25	0.708623	0.144038	0.63561	0.874475*	0.652863	0.612481	0.555556	0.358531	0.350957	0.580334	0.292979	0.959239	0.545667	0.486621	0.852545	0.252231	0.852347	0.2037	0.843451	0.29361	1.04623	0.873038	0.503908	0.505883	0.426798	0.3929	0.47036	0.316228	0.385753	0.649303	0.312811	0.313786	0.5322	0.333333	0.415945	0.321081	0.461401	0.767391	0.330316	0.574367	2.166174*
72	0.883883	0.566352*	0.320122	0.447214	0.5917	0.454052	0.630706	0.32596	0.677285	0.2037	0.248577	0.868927*	0.526235	0.631919	0.620174	0.522976	0.358353	0.655295	0.566352	0.959239	0.536501	0.501298	0.852953	0.252231	0.874097	0.265593	0.902986	0.314294	1	0.926727	0.467183	0.595385	0.552117	0.369833	0.47036	0.254951	0.377825	0.621926	0.28638	0.508136	0.57148	0.320193	0.531751	0.366088	0.46135	0.968688	0.316106	0.549442	2.024846*
73	0.877229	0.632456*	0.335946	0.460977	0.608276	0.48462	0.535373	0.323381	0.696404	0.226903	0.339925	0.730129*	0.581238	0.668206	0.544059	0.543928	0.3488	0.580334	0.284988	0.901044	0.581238	0.541197	0.843661	0.269484	0.737564	0.265593	0.678363	0.325438	0.978787	0.894427	0.53652	0.672617	0.58961	0.315296	0.417467	0.295527	0.377489	0.649303	0.262687	0.309173	0.54748	0.280828	0.620174	0.296022	0.565747	0.974118	0.321694	0.599625	1.961161*
74	0.779759	0.563093*	0.313064	0.256074	0.602213	0.515437	0.588562	0.372678	0.747353	0.148159	0.592464	0.937751*	0.588562	0.65017	0.5752	0.604122	0.42374	0.704257	0.266667	1	0.636274	0.539796	0.849837	0.269484	0.682461	0.231125	0.646813	0.329611	0.978787	0.872172	0.491187	0.625911	0.627878	0.312157	0.428234	0.295527	0.332473	0.689622	0.26291	0.297786	0.54748	0.300995	0.672673	0.403604	0.565747	0.844049	0.285473	0.599625	0.910642*
75	0.772368	0.632456*	0.305639	0.391077	0.586114	0.47465	0.622841	0.246932	0.75271	0.241717	0.51666	0.83223*	0.592749	0.634749	0.671729	0.443775	0.527577	0.636652	0.538138	1.10051	0.636274	0.539072	0.835296	0.331042	0.543928	0.240285	0.66519	0.314601	0.918636	0.724356	0.431131	0.525414	0.723905	0.293721	0.434439	0.186908	0.353351	0.689622	0.26291	0.337954	0.515026	0.28913	0.571662	0.403604	0.465041	0.768295	0.285473	0.599625	0.887954*
76	0.875521	0.685994*	0.321749	0.360555	0.576063	0.465247	0.542326	0.126491	0.75695	0.35781	0.460889	0.766965*	0.67732	0.593888	0.691333	0.340672	0.482104	0.535373	0.542326	1.10051	0.62922	0.564756	0.791613	0.331042	0.543928	0.181902	0.61808	0.303274	0.98048	0.708676	0.392232	0.534048	0.921221	0.284719	0.448691	0.066082	0.365305	0.673745	0.283214	0.402654	0.507174	0.25118	0.412231	0.399353	0.574696	0.77079	0.293767	0.599625	0.667491*
77	0.826192	0.713874*	0.322914	0.403113	0.538082	0.426002	0.542326	0.124035	0.739183	0.594515	0.52345	0.755483*	0.661717	0.634633	0.639406	0.340672	0.489535	0.657231	0.594515	1.05678	0.591761	0.519778	0.759889	0.240879	0.646162	0.17178	0.681115	0.318174	1.03816	0.73231	0.479616	0.524034	0.842857	0.313732	0.492407	0.114332	0.373637	0.682126	0.281959	0.415669	0.491113	0.27735	0.455922	0.464238	0.574696	0.760286	0.269264	0.599625	0.657794*
78	0.833897	0.614295*	0.33752	0.331042	0.563093	0.426482	0.542326	0.151969	0.831039	0.640312	0.557086	1.088546*	0.725691	0.626124	0.618347	0.281942	0.512522	0.803101	0.621926	0.996546	0.570826	0.563093	0.757991	0.249567	0.592749	0.191079	0.702728	0.313006	0.938881	0.700949	0.603382	0.504989	0.803996	0.437945	0.475612	0.180775	0.373637	0.682126	0.268293	0.383677	0.462464	0.27735	0.424839	0.5	0.502588	0.65192	0.257087	0.613572	0.707107*
79	0.943955	0.732642*	0.33752	0.242536	0.571099	0.426482	0.542326	0.155963	0.824621	0.5	0.493964	1.038161*	0.703167	0.599327	0.567646	0.304348	0.48755	0.688021	0.739795	1.07331	0.475277	0.624224	0.776498	0.276773	0.524564	0.239808	0.717958	0.259938	0.943065	0.512292	0.628353	0.468186	0.630286	0.470508	0.488056	0.156174	0.351173	0.720611	0.272691	0.383677	0.553383	0.27735	0.471405	0.542627	0.502588	0.65192	0.278034	0.687184	0.977692*
80	0.887954	0.681115*	0.368414	0.314658	0.571099	0.445789	0.632456	0.186016	0.782296	0.626013	0.466746	0.802773*	0.707107	0.587386	0.598352	0.436539	0.371221	0.467905	0.752009	1.0902	0.565233	0.557428	0.792511	0.266076	0.491097	0.219834	0.699952	0.231735	0.943065	0.524202	0.624264	0.468186	0.546781	0.431272	0.479224	0.158114	0.378746	0.720611	0.285396	0.317734	0.531507	0.306343	0.379432	0.436717	0.48803	0.65192	0.267574	0.727607	1*
81	0.887954	0.642529*	0.37121	0.342405	0.746577	0.410343	0.532152	0.202031	0.715619	0.60458	0.526334	0.96212*	0.80051	0.555556	0.806226	0.478024	0.374281	0.707107	0.765641	0.943616	0.707107	0.559639	0.790632	0.256302	0.545705	0.219834	0.699952	0.262613	0.933053	0.399114	0.614295	0.446185	0.538898	0.405073	0.497578	0.147764	0.410753	0.711068	0.268922	0.317734	0.553383	0.27929	0.5322	0.488397	0.447214	0.643921	0.230761	0.632456	0.937218*
82	0.790569	0.638508*	0.374671	0.265593	0.654379	0.450309	0.499026	0.278543	0.707107	0.598421	0.534947	0.977692*	0.632456	0.525588	0.688805	0.478024	0.481621	0.515079	0.45607	0.926277	0.770884	0.5	0.790632	0.245888	0.549063	0.22207	0.772862	0.428375	0.976529	0.353553	0.578655	0.437237	0.559923	0.380392	0.521536	0.148741	0.408085	0.740483	0.287366	0.32906	0.536875	0.252908	0.537603	0.404304	0.45607	0.67873	0.22284	0.694516	0.819836*
83	0.744348	0.544059*	0.374945	0.288076	0.643342	0.485071	0.444444	0.312348	0.727607	0.553497	0.555175	1*	0.647126	0.537027	0.881432	0.512873	0.426746	0.316228	0.524564	1	0.784465	0.423077	0.790632	0.248013	0.590554	0.22207	0.772862	0.337778	0.95548	0.300828	0.542326	0.340939	0.592749	0.392969	0.479567	0.133333	0.423999	0.80727	0.278368	0.366339	0.486232	0.183804	0.419058	0.310087	0.45607	0.65192	0.214922	0.657596	0.905357*
84	0.516314	0.63375*	0.390047	0.384111	0.670714	0.477165	0.434011	0.269069	0.730838	0.545667	0.666847	0.921777*	0.732448	0.581611	0.871277	0.380006	0.358117	0.523424	0.524564	1	0.814379	0.424822	0.768403	0.226917	0.613572	0.230769	0.780869	0.287754	0.95548	0.240832	0.537484	0.290508	0.620174	0.384615	0.479567	0.148741	0.395637	0.69843	0.272367	0.376914	0.460179	0.211224	0.424264	0.153393	0.445164	0.729964	0.216839	0.682895	0.920447*
85	0.647159	0.626099*	0.440039	0.454545	0.637052	0.493144	0.452769	0.232495	0.691466	0.640312	0.913926	0.764078*	0.707107	0.520306	0.871277	0.3202	0.304114	0.626013	0.580531	0.858898	0.792324	0.463138	0.752377	0.229457	0.790066	0.230769	0.802225	0.298142	0.936828	0.240832	0.536875	0.292603	0.620174	0.371165	0.505228	0.148741	0.409503	0.692897	0.271964	0.330742	0.501477	0.175791	0.399114	0.214176	0.477165	0.757604	0.218769	0.682877	0.711068*
86	0.658983	0.640184*	0.429217	0.48755	0.548161	0.544896	0.479301	0.299813	0.715619	0.646813	0.970329	0.778175*	0.764199	0.550239	0.604122	0.30904	0.344805	0.632456	0.552268	0.860233	0.792324	0.461538	0.754208	0.229457	0.824621	0.342405	0.719271	0.360628	1.01145	0.240832	0.539833	0.333619	0.645326	0.320028	0.510814	0.124757	0.39026	0.692897	0.236507	0.311136	0.536903	0.198144	0.396491	0.392232	0.512148	0.713874	0.199495	0.69843	0.75*
87	0.609878	0.632456*	0.409068	0.48755	0.527153	0.525879	0.493197	0.299813	0.669534	0.669992	0.754474	0.744845*	0.794966	0.533688	0.697486	0.367062	0.325147	0.525226	0.519875	0.967276	0.820716	0.461197	0.752914	0.197426	0.824621	0.305206	0.744247	0.360628	0.997419	0.278527	0.621982	0.381507	0.634776	0.346908	0.497578	0.142857	0.400665	0.839763	0.229843	0.292979	0.523424	0.220564	0.424264	0.219265	0.568458	0.705588	0.198854	0.716432	0.785136*
88	0.605288	0.555556*	0.377614	0.454545	0.443242	0.550939	0.479301	0.395285	0.642809	0.678363	0.810032	0.533333*	0.810032	0.539611	0.7358	0.320156	0.360469	0.523823	0.38829	1.10874	0.820716	0.457936	0.760497	0.249848	0.86155	0.351123	0.72111	0.386503	0.963242	0.278527	0.65192	0.471808	0.572125	0.336686	0.479567	0.159313	0.373815	0.839763	0.225751	0.285249	0.505076	0.242536	0.494975	0.214176	0.341159	0.687874	0.187667	0.71261	0.943616*
89	0.48259	0.563093*	0.348848	0.166667	0.459509	0.506594	0.426875	0.304604	0.63926	0.707107	0.798706	0.519875*	0.903877	0.58315	0.632456	0.320156	0.316822	0.47036	0.298232	1.07259	0.877058	0.457936	0.782845	0.236735	0.787839	0.337954	0.760117	0.410264	0.952111	0.3	0.675556	0.4902	0.661616	0.330596	0.476282	0.142494	0.330267	0.799205	0.223883	0.285714	0.558359	0.221645	0.494975	0.137361	0.281872	0.729183	0.180314	0.760345	0.943616*
90	0.624512	0.707107*	0.327161	0.124035	0.431654	0.506594	0.496139	0.336336	0.643823	0.702313	0.840941	0.537484*	0.651466	0.594635	0.724102	0.33541	0.439879	0.223607	0.228035	1.07059	0.89707	0.40797	0.826216	0.248191	0.940721	0.349215	0.737068	0.434372	0.976529	0.325598	0.671729	0.499041	0.704078	0.328866	0.471224	0.2	0.295378	0.799205	0.238675	0.288551	0.535707	0.165205	0.493197	0.121268	0.276533	0.738241	0.175092	0.598849	1.058626*
91	0.719278	0.681175*	0.331595	0.310087	0.48393	0.420339	0.574412	0.237171	0.617694	0.757842	0.948683	0.582623*	0.653162	0.594635	0.724102	0.33541	0.419807	0.234082	0.352865	1.06815	0.839442	0.469748	0.837456	0.227511	0.940721	0.363803	0.7786	0.430007	0.914934	0.360555	0.632456	0.520381	0.778621	0.287754	0.473655	0.212	0.320444	0.799205	0.242193	0.277945	0.496178	0.184668	0.498729	0.333333	0.5547	0.796566	0.155492	0.598849	0.954521*
92	0.790024	0.669534*	0.327161	0.29361	0.514978	0.381635	0.565685	0.196407	0.556243	0.757842	0.948683	0.541543*	0.767391	0.608229	0.566352	0.333539	0.426601	0.460977	0.316228	0.977692	0.75	0.511351	0.870749	0.227511	0.798228	0.316228	0.791972	0.450377	0.897206	0.427605	0.612564	0.520381	0.8	0.268328	0.502129	0.16169	0.29459	0.799205	0.214633	0.288551	0.46562	0.17055	0.40196	0.319438	0.656532	0.786949	0.172456	0.646813	1*
93	0.885316	0.604292*	0.333429	0.235702	0.49661	0.531577	0.563093	0.264999	0.569376	0.677834	1.02439	0.643921*	0.648042	0.586055	0.531751	0.371986	0.445953	0.367607	0.415227	0.967471	0.760117	0.511351	0.868421	0.20839	0.822108	0.351123	0.766965	0.410264	0.789565	0.397934	0.536739	0.546316	0.646381	0.280784	0.498082	0.242536	0.282969	0.713041	0.193687	0.284704	0.437237	0.204789	0.438529	0.236208	0.55	0.7269	0.183737	0.599625	1*
94	0.783815	0.575396*	0.333429	0.235702	0.45222	0.530912	0.707107	0.237023	0.525374	0.677834	1.04056	0.5696*	0.58712	0.427065	0.531751	0.371986	0.444825	0.434372	0.392232	1.03232	0.770884	0.511351	0.892176	0.224205	0.773021	0.392232	0.815295	0.395285	0.851229	0.382099	0.532397	0.582582	0.502553	0.316835	0.493106	0.215387	0.252498	0.701914	0.193687	0.27735	0.466527	0.238432	0.447214	0.27735	0.373815	0.783718	0.187291	0.529999	1*
95	0.853282	0.632456*	0.345988	0.25	0.466515	0.447624	0.409426	0.21511	0.620174	0.6	0.964332	0.550368*	0.642529	0.456204	0.58722	0.386304	0.451107	0.415227	0.409616	1.02657	0.770884	0.522352	0.905773	0.224205	0.773021	0.392232	0.79603	0.345495	0.850708	0.393896	0.559017	0.536084	0.608121	0.389906	0.48074	0.215387	0.252498	0.673745	0.195711	0.25301	0.47995	0.25904	0.485071	0.344046	0.373815	0.788954	0.17826	0.522976	1.140175*
96	0.663664	0.604122*	0.368069	0.461644	0.443876	0.406946	0.413023	0.28797	0.620876	0.6	0.986486	0.745356*	0.766379	0.404396	0.555556	0.347892	0.402472	0.596464	0.441726	0.908153	0.788871	0.423408	0.893957	0.203722	0.773021	0.56617	0.830075	0.271052	0.858836	0.388309	0.596464	0.554026	0.50985	0.396491	0.467229	0.071796	0.198246	0.673745	0.219819	0.237125	0.47995	0.238432	0.4	0.285714	0.373815	0.788954	0.155286	0.566352	0.990521*
97	0.737698	0.707107*	0.352261	0.392232	0.481664	0.436717	0.450606	0.255459	0.714286	0.587518	0.673146	0.646609*	0.757706	0.49837	0.525374	0.293349	0.386112	0.697308	0.5	0.808122	0.788871	0.433379	0.882281	0.213467	0.780869	0.56617	0.707107	0.252999	0.824336	0.392837	0.541543	0.570173	0.480196	0.396491	0.510538	0.237171	0.198246	0.687184	0.200556	0.237125	0.466527	0.209611	0.333333	0.302061	0.376725	0.788954	0.155286	0.523053	0.971286*
98	0.701047	0.640184*	0.352261	0.242536	0.552832	0.459385	0.502801	0.164399	0.720607	0.618347	0.829599	0.68544*	0.748942	0.608229	0.470767	0.302461	0.326729	0.567646	0.613631	0.986143	0.746788	0.436256	0.859368	0.213467	0.780869	0.47036	0.703167	0.278657	0.750773	0.380143	0.528977	0.589256	0.492432	0.380873	0.437125	0.237171	0.200089	0.758599	0.184873	0.244114	0.486232	0.215866	0.25	0.38075	0.379217	0.790569	0.153571	0.60208	1.612452*
99	0.872172	0.808608*	0.352261	0.306786	0.568481	0.509902	0.542326	0.200236	0.667609	0.671855	1.22793	0.599525*	0.761297	0.5	0.563093	0.303661	0.411158	0.614636	0.724356	0.849229	0.769309	0.377302	0.838961	0.222546	0.745356	0.48269	0.798087	0.264657	0.7358	0.324355	0.535844	0.557667	0.49029	0.387326	0.570088	0.220564	0.18772	0.776189	0.17092	0.269432	0.486232	0.215866	0.207614	0.392232	0.375995	0.711068	0.170032	0.60208	1.627882*
100	0.730882	0.824621*	0.343872	0.306786	0.790569	0.559017	0.542326	0.261488	0.620876	0.664364	1.05409	0.632456*	0.897902	0.416667	0.538516	0.29361	0.503453	0.65192	0.648606	0.798706	0.728431	0.367607	0.8375	0.229309	0.814411	0.47036	0.870855	0.267999	0.720805	0.353214	0.535844	0.565685	0.49029	0.386727	0.589015	0.220564	0.207583	0.814983	0.183793	0.269432	0.486232	0.235702	0.270172	0.2	0.434414	0.711068	0.185695	0.60208	1.333333*
101	0.748539	0.653047*	0.335302	0.282843	0.691333	0.575817	0.688468	0.199007	0.619048	0.558359	1	0.717848*	0.848365	0.743303	0.553718	0.332182	0.556623	0.642161	0.625	0.989882	0.790569	0.4	0.850391	0.214679	0.950146	0.449333	0.810998	0.276533	0.719841	0.323429	0.587885	0.557667	0.490449	0.398147	0.59997	0.091098	0.241083	0.793138	0.156365	0.255446	0.460179	0.235702	0.27735	0.2	0.434414	0.711068	0.174541	0.392232	1.34371*
102	0.8125	0.675941*	0.335302	0.319438	0.77201	0.584103	0.656865	0.187482	0.571429	0.574412	1.16003	0.767354*	0.883072	0.767923	0.605293	0.3202	0.620174	0.659768	0.690335	1.12188	0.795256	0.455743	0.852567	0.23241	0.613572	0.428571	0.795285	0.276533	0.692963	0.346355	0.559017	0.557667	0.571099	0.394756	0.602569	0.060634	0.25328	0.790398	0.194962	0.230835	0.441461	0.255286	0.291492	0.251823	0.302891	0.739183	0.163244	0.392232	1.315192*
103	0.8125	0.666667*	0.335302	0.339182	0.748562	0.629249	0.6	0.122859	0.607517	0.569976	1.03885	0.877058*	0.848636	0.770192	0.536656	0.328798	0.62867	0.666667	0.690335	1.09322	0.838274	0.43201	0.862144	0.246434	0.644981	0.482573	0.764375	0.276533	0.724102	0.346355	0.638696	0.509955	0.571099	0.389896	0.598678	0.060634	0.251297	0.790398	0.200556	0.222789	0.501477	0.263733	0.252982	0.206041	0.302891	0.677285	0.170336	0.511408	1.107436*
104	0.746788	0.72111*	0.34549	0.333333	0.8014	0.548372	0.533333	0.044108	0.626331	0.542326	1.13813	0.787184*	0.707107	0.769231	0.324206	0.386135	0.640312	0.539072	0.690335	1.17418	0.790569	0.397026	0.895272	0.257134	0.575224	0.640386	0.686803	0.261219	0.781969	0.325598	0.693172	0.516314	0.769309	0.405518	0.621034	0	0.230759	0.790569	0.181776	0.196473	0.424822	0.238773	0.323381	0.274721	0.3125	0.655122	0.183262	0.519875	1.479419*
105	0.78365	0.707107*	0.342129	0.420703	0.837276	0.49952	0.613572	0	0.644876	0.506897	1.10431	0.788954*	0.711068	0.769231	0.306816	0.330537	0.739882	0.592043	0.602355	1	0.72111	0.383677	0.892816	0.234024	0.704664	0.783402	1.04536	0.261219	0.757132	0.313083	0.908195	0.533594	1	0.397558	0.748562	0.060634	0.230759	0.774305	0.165074	0.224764	0.424822	0.2618	0.248282	0.283176	0.294118	0.672309	0.184942	0.519875	1.414214*
106	0.752071	0.732933*	0.34549	0.420703	0.806226	0.48419	0.558359	0.133333	0.638012	0.669534	0.926095	0.788954*	0.721271	0.866296	0.370031	0.355534	0.813171	0.574367	0.640312	0.770884	0.802773	0.351123	0.869871	0.204669	0.630706	0.75	0.798087	0.237617	0.611933	0.350037	0.715061	0.555803	0.640312	0.381787	0.796041	0.060634	0.288109	0.787184	0.155836	0.230582	0.424822	0.2618	0.165521	0.263416	0.376654	0.635176	0.193499	0.461644	1.144906*
107	0.563093	0.664364*	0.360927	0.527046	0.9362	0.437048	0.528655	0.094281	0.638012	0.690268	0.8574	0.734726*	0.700949	0.707107	0.371391	0.369102	0.583158	0.549442	0.669723	0.799361	0.754247	0.316928	0.878046	0.204713	0.609878	0.956066	0.764161	0.237617	0.895193	0.350037	0.494186	0.592134	0.670402	0.371182	0.790569	0.137361	0.30269	0.784465	0.155436	0.234745	0.424822	0.2618	0.126491	0.255704	0.365744	0.565685	0.214792	0.5	0.970143*
108	0.943527	0.754615*	0.355876	0.485071	0.869227	0.485643	0.471082	0.098821	0.665355	0.538462	0.77285	0.9135*	0.662506	0.718699	0.667947	0.408539	0.357192	0.549442	0.669723	0.820282	0.754247	0.358531	0.86746	0.192339	0.609878	0.956066	0.764161	0.206543	0.711934	0.32052	0.454794	0.529999	0.722058	0.362936	0.841114	0.206725	0.3	0.781025	0.269069	0.229975	0.424822	0.253531	0.295378	0.190003	0.382821	0.677285	0.214244	0.543214	1.096678*
109	0.827415	0.727273*	0.360005	0.60208	0.894427	0.549049	0.473029	0.098821	0.687143	0.505146	0.72515	0.850026*	0.719078	0.656532	0.568481	0.422276	0.361839	0.632456	0.648606	0.946594	0.8318	0.431563	0.86746	0.214724	0.722058	0.951881	0.848528	0.160701	0.679292	0.262303	0.459824	0.529999	0.821681	0.384036	0.783528	0.269536	0.226541	0.813941	0.205462	0.229975	0.408807	0.223943	0.383482	0.191663	0.382821	0.656532	0.206222	0.640184	1.096678*
110	0.775265	0.72111*	0.358626	0.447214	0.892288	0.594692	0.450522	0.085671	0.640184	0.542326	0.72515	0.838002*	0.919239	0.612564	0.408807	0.444028	0.338917	0.67873	0.675863	0.902485	0.885316	0.67732	0.86746	0.251507	0.707107	0.993884	0.858898	0.109028	0.676698	0.205944	0.358548	0.537688	0.780869	0.389969	0.746981	0.189737	0.243243	0.752489	0.117373	0.243717	0.384615	0.223943	0.370117	0.191663	0.374075	0.56477	0.217307	0.640184	0.943616*
111	0.682895	0.729459*	0.368785	0.342405	0.859566	0.667947	0.47641	0.101535	0.596464	0.553497	0.955779	0.808736*	0.901212	0.576701	0.482472	0.441461	0.351237	0.781025	0.685283	0.810032	0.940291	0.703167	0.887591	0.246878	0.640312	0.98913	0.773538	0.079745	0.674437	0.201802	0.402248	0.497859	0.742016	0.408617	0.717391	0.201802	0.352389	0.695103	0.114354	0.243717	0.39968	0.23989	0.486504	0.142857	0.368782	0.558539	0.200608	0.694516	0.923548*
112	0.734726	0.729964*	0.359013	0.328798	0.844533	0.67873	0.450522	0.093454	0.6	0.58722	1.40633	1.153376*	0.969065	0.516864	0.476199	0.446856	0.392232	0.734726	0.719925	0.626948	0.851469	0.637284	0.898165	0.223422	0.798228	0.946594	0.8	0.113633	0.581376	0.201802	0.480569	0.54105	0.475277	0.455794	0.723241	0.073521	0.30909	0.684347	0.128163	0.242536	0.39968	0.238432	0.425735	0.142857	0.447214	0.538516	0.182252	0.613572	0.746788*
113	0.618347	0.803101*	0.338116	0.246598	0.844533	0.566352	0.401112	0.242536	0.66326	0.613572	1.56702	1.169583*	0.866859	0.734726	0.643921	0.439469	0.507272	0.657596	0.815097	1.02899	0.694996	0.745356	0.907722	0.223422	0.734726	0.946059	0.894427	0.115385	0.538229	0.207813	0.473776	0.54105	0.374828	0.461682	0.72111	0.158114	0.262613	0.677131	0.163861	0.231682	0.39968	0.231523	0.448535	0.087706	0.438633	0.523053	0.184389	0.744348	0.729459*
114	0.573121	0.734091*	0.328549	0.212132	0.88083	0.566352	0.470588	0.19574	0.681098	0.613572	1.32632	0.846154*	0.846901	0.671702	0.624426	0.434878	0.394163	0.581238	0.798087	0.910642	0.664364	0.852072	0.90886	0.223422	0.598849	1.16799	0.755295	0.119618	0.553718	0.25939	0.480885	0.503537	0.293759	0.461682	0.71247	0.073521	0.267374	0.677131	0.173158	0.206512	0.39968	0.231523	0.455321	0.083189	0.464474	0.460721	0.170882	0.744348	0.616086*
115	0.45055	0.702313*	0.347616	0.156174	0.737564	0.763965	0.5	0.258863	0.706274	0.581318	1.1276	0.927119*	0.894427	0.72111	0.542326	0.413865	0.392314	0.813489	0.83205	0.874475	0.581318	0.815097	0.898606	0.223422	0.566558	1.26578	0.822108	0.153846	0.541197	0.312348	0.478202	0.549557	0.286961	0.451806	0.714722	0.069843	0.320324	0.670402	0.183989	0.255562	0.461538	0.251533	0.527046	0.083189	0.486504	0.605293	0.203502	0.79421	0.573121*
116	0.483155	0.746577*	0.351846	0.107521	0.737564	0.802149	0.5	0.412231	0.699284	0.543214	1.08425	0.968963*	0.788377	0.717197	0.491097	0.418783	0.3861	0.67082	0.920869	0.890327	0.603583	0.757604	0.898606	0.223422	0.566558	0.920133	0.822108	0.150958	0.541197	0.312348	0.4864	0.513247	0.254237	0.454506	0.724528	0.191565	0.349215	0.670402	0.191565	0.248814	0.521119	0.252982	0.4287	0.117647	0.451754	0.609131	0.207397	0.67873	0.629317*
117	0.444028	0.729923*	0.353501	0.076696	0.843996	0.700949	0.581318	0.350823	0.651107	0.498273	1.31246	1*	0.770614	0.54853	0.519875	0.379579	0.377237	0.614636	0.843801	0.921954	0.624224	0.707107	0.898606	0.255936	0.566558	0.765691	0.822108	0.195727	0.530687	0.34219	0.4864	0.468704	0.242933	0.4486	0.748094	0.219265	0.349215	0.69843	0.191565	0.255704	0.521119	0.274874	0.460907	0.19104	0.435917	0.589015	0.266723	0.620174	0.552158*
118	0.605814	0.729923*	0.343439	0.076923	0.717043	0.488635	0.466527	0.089443	0.649189	0.536875	1.08309	1.094541*	0.770614	0.653927	0.596464	0.371391	0.363526	0.723241	0.841445	0.883072	0.614295	0.642161	0.860743	0.265584	0.535997	0.724286	0.765641	0.209319	0.496917	0.332794	0.4864	0.431615	0.27735	0.429881	0.781025	0.219265	0.446104	0.74148	0.170872	0.255704	0.521119	0.241144	0.407251	0.249086	0.475277	0.6108	0.209719	0.808608	0.525226*
119	0.541752	0.72111*	0.343439	0.144038	0.710634	0.419939	0.466527	0.256307	0.618347	0.505146	1.01813	1.050552*	0.817203	0.683779	0.548195	0.396881	0.390988	0.707107	0.782534	0.914443	0.614295	0.642161	0.833447	0.267985	0.803996	0.670125	0.734726	0.209319	0.515137	0.339445	0.470328	0.431615	0.254237	0.420015	0.781025	0.126491	0.400471	0.777492	0.172005	0.229509	0.521119	0.242186	0.203912	0.249086	0.39293	0.657764	0.192333	0.858898	0.496139*
120	0.53652	0.724398*	0.363779	0.073521	0.574412	0.529999	0.575396	0.270914	0.620174	0.542326	0.88752	0.986486*	0.912084	0.823792	0.586805	0.425735	0.420023	0.754474	0.75	0.94462	0.614295	0.676422	0.840093	0.257147	0.724356	0.637377	0.781025	0.209319	0.553481	0.370135	0.422316	0.431615	0.254237	0.422641	0.820061	0.255655	0.379364	0.65448	0.201305	0.208727	0.521119	0.243005	0.196116	0.181237	0.405911	0.592043	0.192333	0.746577	0.496139*
121	0.54139	0.677834*	0.349059	0.156174	0.569976	0.59743	0.608229	0.214176	0.623509	0.618347	0.88752	0.803996*	0.88083	0.691684	0.612962	0.5	0.40196	0.789639	0.740233	0.933809	0.614295	0.700404	0.847821	0.220344	0.484234	0.637377	0.707107	0.209319	0.656532	0.381562	0.440012	0.363106	0.254237	0.422641	0.734264	0.164399	0.362971	0.53233	0.153862	0.207043	0.521119	0.258058	0.170375	0.131306	0.405911	0.592749	0.274081	0.744348	0.393919*
122	0.54139	0.729923*	0.354969	0.07036	0.539072	0.656679	0.608229	0.217186	0.623509	0.536875	0.93473	1.017545*	0.822632	0.717164	0.646813	0.479675	0.384726	0.789639	0.764199	0.894427	0.659503	0.700404	0.844091	0.209741	0.511408	0.662346	0.67873	0.209319	0.691333	0.32052	0.443977	0.363106	0.260277	0.422641	0.720534	0.156174	0.341397	0.555395	0.145627	0.229489	0.479616	0.258058	0.170375	0.065653	0.405911	0.651795	0.264038	0.694516	0.468165*
123	0.60967	0.597022*	0.354969	0.087706	0.495261	0.898126	0.608229	0.235702	0.61808	0.503793	0.780869	1.07175*	0.707107	0.750505	0.766965	0.395793	0.384726	0.789639	0.732642	0.737643	0.639137	0.767112	0.844091	0.209741	0.515388	0.581016	0.620174	0.189215	0.693067	0.254846	0.472302	0.363106	0.27735	0.43458	0.722124	0.265085	0.438652	0.796778	0.124226	0.222996	0.479616	0.249872	0.160431	0.098773	0.403896	0.684257	0.271443	0.613572	0.585206*
124	0.582828	0.620174*	0.336569	0.085749	0.494941	0.627149	0.684257	0.101535	0.618347	0.466527	0.778559	0.894427*	0.714335	0.708943	0.748539	0.3468	0.344246	0.900617	0.632456	0.617454	0.625	0.817387	0.832826	0.220344	0.561591	0.574221	0.657596	0.215041	0.736685	0.253161	0.409056	0.378981	0.293759	0.45585	0.729625	0.384615	0.402891	0.782304	0.162168	0.227038	0.393919	0.238262	0.152867	0.151446	0.403896	0.710634	0.241879	0.613572	0.677285*
125	0.630286	0.732084*	0.318699	0	0.490143	0.562764	0.674579	0.207614	0.616259	0.447214	0.788382	0.922801*	0.682461	0.629984	0.798228	0.346624	0.349215	0.773265	0.620174	0.781025	0.675429	0.767112	0.839399	0.209741	0.591969	0.541543	0.646813	0.183101	0.74218	0.254951	0.40196	0.390226	0.293759	0.45585	0.739882	0.258863	0.39366	0.782304	0.134138	0.227038	0.371391	0.227954	0.154445	0.151446	0.45754	0.710634	0.270148	0.542326	0.527046*
126	0.67609	0.707107*	0.318699	0	0.398948	0.522009	0.636396	0.447214	0.612826	0.443319	0.790133	0.895249*	0.793291	0.700404	0.684257	0.370117	0.373865	0.617611	0.667947	0.737643	0.697308	0.751134	0.839399	0.215486	0.564333	0.56861	0.591969	0.161206	0.631001	0.239093	0.377302	0.390226	0.27078	0.466127	0.739882	0.2037	0.36671	0.782304	0.131397	0.227038	0.371391	0.182995	0.178596	0.101797	0.488141	0.719092	0.281308	0.632456	0.539072*
127	0.69979	0.72111*	0.313267	0.082761	0.507242	0.669534	0.598671	0.493865	0.573488	0.442658	0.756391	0.987927*	0.771957	0.770884	0.537603	0.382099	0.387869	0.642161	0.758433	0.780762	0.757228	0.750727	0.847204	0.205117	0.585206	0.542504	0.995717	0.137433	0.580314	0.217899	0.413401	0.363803	0.278368	0.500877	0.701781	0.146176	0.416103	0.631364	0.208795	0.227939	0.371391	0.183954	0.175788	0.159617	0.514024	0.69857	0.274874	0.542326	0.583095*
128	0.707107	0.667237*	0.320617	0	0.48288	0.694516	0.50291	0.594692	0.570826	0.435365	0.708676	0.914443*	0.783402	0.770922	0.493865	0.471405	0.363123	0.739709	0.71261	0.841406	0.707107	0.715061	0.847204	0.198438	0.519067	0.533352	0.660486	0.159719	0.580314	0.221487	0.398167	0.369882	0.268922	0.526721	0.713831	0.130744	0.454288	0.782304	0.183793	0.227939	0.452822	0.183954	0.175262	0.171499	0.501374	0.69857	0.309949	0.543214	0.447214*
129	0.69979	0.692308*	0.328247	0.183186	0.437847	0.574412	0.503891	0.838525	0.552832	0.529999	0.624224	1*	0.75	0.831492	0.593883	0.471405	0.33541	0.739709	0.809239	0.749359	0.651153	0.72625	0.827885	0.195352	0.519067	0.532858	0.786024	0.159719	0.624264	0.302732	0.415646	0.346583	0.268922	0.516704	0.710475	0.065372	0.481634	0.752077	0.176258	0.203473	0.49923	0.212378	0.183569	0.25	0.51728	0.669534	0.303531	0.543214	0.592749*
130	0.688308	0.677285*	0.358766	0.183186	0.437847	0.553497	0.565962	0.230089	0.605257	0.529999	0.636364	0.945221*	0.777029	0.773021	0.467449	0.555556	0.348074	0.669534	0.833854	0.660486	0.674489	0.768403	0.827885	0.188052	0.470767	0.518978	0.803101	0.145787	0.631001	0.311041	0.439166	0.377359	0.200992	0.515766	0.737643	0.09513	0.539339	0.743276	0.144175	0.176664	0.49923	0.258058	0.132385	0.311925	0.572218	0.68544	0.311154	0.543214	0.485071*
131	0.701339	0.65192*	0.377695	0.183186	0.437847	0.715748	0.651248	0.30904	0.601329	0.570826	0.681115	0.946864*	0.807126	0.716319	0.372374	0.511594	0.394646	0.669534	0.780869	0.618347	0.675941	0.790133	0.795634	0.175207	0.574221	0.527148	0.796333	0.135787	0.652863	0.311041	0.396028	0.392232	0.211867	0.519205	0.73124	0.202031	0.515952	0.8	0.144175	0.174891	0.49923	0.214614	0.103203	0.311925	0.464474	0.688091	0.323204	0.543214	0.383482*
132	0.692863	0.65192*	0.404546	0.081923	0.431563	0.746577	0.6108	0.206041	0.549527	0.61808	0.674822	1.035454*	0.892712	0.772862	0.38789	0.511594	0.426875	0.856706	0.780869	0.806226	0.719078	0.72625	0.812802	0.192218	0.518262	0.541665	0.796333	0.102003	0.65911	0.311041	0.413366	0.392232	0.211867	0.519205	0.73621	0.202031	0.491539	0.796301	0.170681	0.202508	0.468609	0.198552	0.123163	0.260768	0.433651	0.688091	0.295296	0.581238	0.383482*
133	0.619715	0.651153*	0.38951	0.115857	0.320398	0.784465	0.548195	0.232495	0.530171	0.570826	0.683265	0.963242*	0.920171	0.723933	0.395285	0.50702	0.495336	0.856706	0.7786	0.640312	0.719078	0.653162	0.802494	0.162241	0.393341	0.5	0.75151	0.105409	0.65911	0.311041	0.419721	0.392232	0.2205	0.514466	0.710221	0.131306	0.498273	0.807772	0.170681	0.22486	0.449325	0.219265	0.152765	0.286389	0.359011	0.714286	0.310228	0.581238	0.333333*
134	0.656228	0.651153*	0.38951	0.115857	0.337563	0.736974	0.466905	0.746577	0.542766	0.592749	0.706225	1*	0.920171	0.686783	0.460721	0.563397	0.587784	0.830455	0.790569	0.640312	0.784465	0.617331	0.782369	0.147424	0.415227	0.485363	0.863802	0.10983	0.77201	0.210999	0.465361	0.383131	0.25375	0.495261	0.710221	0.134535	0.468186	0.68654	0.176721	0.236352	0.393159	0.219265	0.178615	0.288214	0.359011	0.714286	0.353214	0.640312	0.128037*
135	0.6999	0.713874*	0.374648	0.196116	0.440454	0.68154	0.421879	0.605257	0.51624	0.502801	0.743294	0.937218*	0.851469	0.581144	0.505076	0.548426	0.570724	0.729964	0.940291	0.640312	0.778337	0.723241	0.773265	0.156893	0.466527	0.499772	0.765641	0.137057	0.780479	0.187357	0.430402	0.383131	0.234645	0.497562	0.710221	0.134535	0.502884	0.775074	0.176721	0.236263	0.357192	0.226224	0.227626	0.310893	0.339182	0.613941	0.362949	0.539072	0*
136	0.689796	0.724398*	0.35182	0.234888	0.503815	0.678752	0.396448	0.259938	0.464991	0.620174	0.703598	0.947511*	0.85987	0.730882	0.575876	0.522009	0.794966	0.729964	0.940291	0.637377	0.778337	0.77658	0.761832	0.159361	0.523424	0.492762	0.808608	0.105118	0.694262	0.187357	0.371747	0.427503	0.254601	0.500958	0.702752	0.430721	0.504754	0.916309	0.176721	0.230453	0.397151	0.233635	0.195306	0.296374	0.305868	0.56477	0.34884	0.538516	0.181071*
137	0.663891	0.749359*	0.355479	0.190261	0.503815	0.616524	0.396448	0.228086	0.504989	0.575509	0.653622	0.877058*	0.851469	0.873047	0.645169	0.512018	0.807482	0.75	0.932325	0.72111	0.837404	0.746278	0.761444	0.165209	0.477102	0.478029	0.72111	0.132934	0.670176	0.18923	0.425735	0.417309	0.254601	0.493652	0.705658	0.439768	0.46225	0.78981	0.176721	0.245825	0.397151	0.19266	0.199007	0.290619	0.325033	0.600812	0.333333	0.67082	0.282843*
138	0.682551	0.729459*	0.355479	0.210235	0.545521	0.614957	0.414335	0.215387	0.478322	0.667237	0.667967	1.204159*	0.758728	0.810757	0.602355	0.504933	0.742781	0.75	0.931266	0.652863	0.720189	0.746278	0.726847	0.177807	0.325553	0.480543	0.734726	0.134409	0.590165	0.207305	0.481893	0.44237	0.239931	0.501595	0.716024	0.454077	0.48216	0.766376	0.128205	0.25896	0.415227	0.218727	0.168204	0.391381	0.378981	0.63895	0.30575	0.631055	0.316228*
139	0.752552	0.638508*	0.346925	0.183186	0.533512	0.593977	0.380058	0.101535	0.532152	0.752914	0.657324	1.056118*	0.744348	0.800052	0.645942	0.468521	0.671729	0.757842	0.704664	0.549063	0.720189	0.743349	0.707107	0.177807	0.344828	0.445259	0.620174	0.134409	0.613872	0.207305	0.513319	0.427652	0.196116	0.524685	0.616131	0.454077	0.548948	0.772934	0.128205	0.230999	0.469776	0.266793	0.198362	0.480847	0.353553	0.63895	0.304682	0.632456	0.2*
140	0.789593	0.666667*	0.353501	0.220863	0.612901	0.608639	0.361022	0.151446	0.598671	0.752914	0.700404	1.132778*	0.773933	0.857803	0.648606	0.428571	0.632456	0.744348	0.704664	0.359635	0.802702	0.786714	0.702348	0.14794	0.333542	0.445259	0.620174	0.134409	0.592134	0.207305	0.513319	0.412082	0.217571	0.556718	0.685588	0.467905	0.548948	0.752077	0.134185	0.208835	0.430007	0.266793	0.249474	0.491113	0.391077	0.677285	0.337147	0.632456	0.447214*
141	0.729008	0.804984*	0.348848	0.183186	0.455251	0.582772	0.425358	0.055902	0.562667	0.707107	0.672673	1.056118*	0.75	0.802773	0.647059	0.357338	0.632456	0.765641	0.882786	0.377308	0.798087	0.740233	0.758039	0.149828	0.373216	0.445259	0.65372	0.132934	0.622896	0.225611	0.520372	0.389169	0.222981	0.540188	0.698227	0.467905	0.562764	0.693247	0.108503	0.207719	0.469776	0.266793	0.267374	0.375395	0.351123	0.63895	0.328337	0.694516	0.362143*
142	0.719925	0.8*	0.372185	0.126491	0.507242	0.562562	0.455877	0.083189	0.547933	0.657231	0.807063	0.946077*	0.811396	0.732573	0.751134	0.369102	0.723271	0.834698	1	0.222497	0.67732	0.780869	0.734444	0.124226	0.519021	0.468686	0.639841	0.144187	0.652836	0.243794	0.535203	0.389169	0.235555	0.550553	0.651795	0.153846	0.56954	0.667237	0.152069	0.212351	0.430007	0.274594	0.274996	0.391077	0.36329	0.710148	0.315972	0.666667	0.333333*
143	0.708967	0.707107*	0.372185	0.126491	0.559923	0.544906	0.44776	0.083189	0.592105	0.657231	0.772357	0.993884*	0.897206	0.747001	0.785714	0.422447	0.830455	0.83749	1	0.303137	0.692559	0.768403	0.726865	0.118348	0.550698	0.5	0.691333	0.142494	0.608018	0.254972	0.512292	0.406745	0.249688	0.521818	0.549866	0.076923	0.543828	0.693247	0.161955	0.234888	0.29361	0.298327	0.310087	0.333333	0.36329	0.755468	0.344305	0.724286	0.570088*
144	0.717482	0.789893*	0.362143	0.207614	0.519875	0.551883	0.433861	0.083189	0.574148	0.620174	0.688714	0.95538*	0.876148	0.816256	0.575876	0.348743	0.830455	0.83749	1	0.285886	0.739183	0.787184	0.723517	0.128145	0.550698	0.475007	0.691333	0.128965	0.626197	0.256401	0.466673	0.461774	0.230201	0.514127	0.560028	0.108786	0.515192	0.693247	0.161322	0.234888	0.316228	0.289852	0.219834	0.344234	0.383677	0.765641	0.387331	0.724286	0.312348*
145	0.753966	0.707107*	0.362143	0.115857	0.519875	0.444283	0.4	0.138675	0.602355	0.620174	0.688512	0.940011*	0.869171	0.812794	0.485341	0.375212	0.82645	0.834597	1.07075	0.235702	0.692559	0.7269	0.7202	0.113132	0.545466	0.505719	0.666667	0.128965	0.57496	0.256401	0.378633	0.489228	0.230201	0.542917	0.522128	0.217571	0.443347	0.696388	0.161322	0.229765	0.327561	0.265403	0.184458	0.37677	0.427744	0.765641	0.415878	0.493197	0.624695*
146	0.778337	0.707107*	0.371003	0.124035	0.485875	0.429266	0.371391	0.207168	0.566389	0.622841	0.651017	0.940011*	0.857928	0.776493	0.668508	0.447675	0.864832	1	0.941534	0.235702	0.67732	0.800995	0.731013	0.117346	0.562495	0.431741	0.643438	0.132934	0.520289	0.29109	0.378633	0.452679	0.211867	0.531751	0.582892	0.166667	0.42854	0.696388	0.166206	0.208458	0.356131	0.263733	0.185154	0.347258	0.25707	0.732448	0.440454	0.449719	0.624695*
147	0.676533	0.670402*	0.355558	0.137361	0.415227	0.471405	0.386769	0.207168	0.547933	0.710148	0.751016	1.178361*	0.838002	0.731235	0.645169	0.496595	0.774063	0.838274	0.885316	0.35781	0.745356	0.746788	0.726674	0.103362	0.562495	0.4034	0.901388	0.100759	0.498527	0.301393	0.404226	0.43624	0.263904	0.537245	0.550009	0.104685	0.38441	0.734726	0.17178	0.208458	0.376116	0.268205	0.179428	0.271163	0.269449	0.763997	0.489588	0.526235	0.666667*
148	0.692377	0.745356*	0.355662	0.097129	0.415227	0.465705	0.378899	0.236208	0.48269	0.67732	0.73667	1.1094*	0.844049	0.711029	0.563093	0.482573	0.774063	0.907923	0.883452	0.352332	0.69843	0.851469	0.69634	0.091377	0.583095	0.4034	0.656532	0.100759	0.549049	0.264327	0.486821	0.483108	0.263904	0.537245	0.626839	0.242536	0.404488	0.717258	0.183935	0.219512	0.386632	0.24763	0.19111	0.26029	0.426036	0.734189	0.446708	0.620174	0.223607*
149	0.692377	0.696526*	0.338116	0.09245	0.427087	0.465705	0.378899	0.268705	0.451378	0.646609	0.886135	1.183938*	0.691333	0.755631	0.581238	0.471082	0.818182	0.907923	0.882786	0.415227	0.677285	0.851469	0.705524	0.087485	0.583095	0.4034	0.29361	0.100759	0.484776	0.264327	0.519743	0.483108	0.263904	0.518343	0.661648	0.438529	0.422716	0.682793	0.167235	0.208458	0.366088	0.24985	0.180407	0.303547	0.481083	0.707107	0.436467	0.620174	0.424264*
150	0.706214	0.784465*	0.333281	0.185695	0.373477	0.410559	0.362199	0.123929	0.5	0.672519	0.795256	1.360147*	0.698041	0.833651	0.505146	0.49923	0.856173	0.907923	0.781544	0.299425	0.691051	0.775343	0.718341	0.087485	0.51724	0.408601	0.307148	0.100759	0.468959	0.25713	0.564808	0.507371	0.230417	0.541835	0.750727	0.415227	0.431654	0.770761	0.167235	0.184573	0.485643	0.279341	0.173158	0.356235	0.563093	0.680631	0.416174	0.519875	0.434372*
151	0.68438	0.790569*	0.327605	0.09245	0.384803	0.405016	0.372161	0.271393	0.496904	0.682504	0.720607	1.306094*	0.678511	0.779667	0.506897	0.407411	0.847244	0.919018	0.883452	0.246932	0.732596	0.775343	0.69814	0.120788	0.480885	0.380963	0.566352	0.100759	0.456108	0.28748	0.455961	0.5	0.200197	0.52395	0.755693	0.316228	0.471405	0.812713	0.213002	0.183147	0.417766	0.259621	0.223178	0.407206	0.606339	0.654976	0.435116	0.519875	0.415227*
152	0.665074	0.867349*	0.355558	0.259064	0.395925	0.324844	0.388889	0.32249	0.598352	0.790569	0.767834	1.382666*	0.647369	0.783076	0.543928	0.459509	0.847244	0.825379	0.882786	0.246932	0.732596	0.793762	0.69814	0.111522	0.502494	0.433886	0.553066	0.136788	0.570826	0.256586	0.484693	0.468953	0.220572	0.537245	0.795285	0.342997	0.428202	0.786106	0.213334	0.163858	0.455488	0.270914	0.261712	0.398628	0.715891	0.676323	0.446851	0.599625	0.570088*
153	0.665074	0.835629*	0.350304	0.259064	0.348743	0.338515	0.469776	0.491762	0.594692	0.839763	0.737698	1.063602*	0.662506	0.773265	0.505146	0.466905	0.85375	0.892965	0.882786	0.281872	0.732596	0.838274	0.692733	0.111522	0.512652	0.421764	0.447214	0.119853	0.598352	0.256586	0.499724	0.468462	0.220572	0.581016	0.730882	0.4159	0.420989	0.728592	0.250966	0.165521	0.391825	0.262865	0.256125	0.364878	0.781025	0.776035	0.434262	0.657596	0.592749*
154	0.616707	0.804984*	0.346874	0.29361	0.374887	0.347589	0.529412	0.916246	0.594692	0.839763	0.83189	1.00729*	0.693778	0.736352	0.532769	0.530171	0.82645	0.907923	0.848528	0.234082	0.732596	0.752914	0.687517	0.111522	0.52821	0.404304	0.4	0.109612	0.585471	0.264094	0.543706	0.407824	0.241817	0.606877	0.734452	0.349215	0.434597	0.750444	0.187414	0.165521	0.494975	0.274651	0.2087	0.375395	0.782154	0.776035	0.425774	0.707107	0.592749*
155	0.590221	0.72111*	0.352587	0.362473	0.371391	0.372123	0.528498	0.943527	0.519034	0.847141	0.765641	0.499714*	0.753966	0.738433	0.558156	0.632456	0.709558	0.907923	0.868243	0.20795	0.708623	0.688021	0.687874	0.107809	0.52821	0.404304	0.368782	0.067267	0.608424	0.264094	0.572713	0.465044	0.229265	0.597759	0.734452	0.373288	0.488225	0.760345	0.187221	0.165521	0.588172	0.257408	0.271163	0.375395	0.72111	0.719425	0.421359	0.766965	0.592749*
156	0.512148	0.749429*	0.340003	0.47231	0.367035	0.410141	0.529021	0.723241	0.527633	0.847141	0.766965	0.406138*	0.812484	0.737625	0.397643	0.559933	0.600851	0.892965	0.926855	0.235702	0.693375	0.657231	0.690352	0.126986	0.540343	0.372471	0.406946	0.109612	0.600925	0.239777	0.578232	0.521536	0.252452	0.576166	0.734452	0.44117	0.463364	0.866347	0.187221	0.165521	0.519875	0.288375	0.281223	0.375395	0.66519	0.620174	0.419464	0.602355	0.5547*
157	0.510471	0.686803*	0.351584	0.605257	0.367035	0.442435	0.5	0.921443	0.522681	0.764078	0.701047	0.961004*	0.814822	0.906996	0.528655	0.552408	0.62686	0.955201	0.926855	0.315981	0.546324	0.613424	0.712262	0.144685	0.555556	0.372471	0.406946	0.141421	0.600925	0.119573	0.578232	0.504679	0.258822	0.57661	0.745356	0.378899	0.472846	0.866347	0.18698	0.187266	0.462464	0.290732	0.26116	0.28034	0.808608	0.609711	0.304707	0.646813	0.285714*
158	0.524586	0.697308*	0.360555	0.629317	0.354887	0.404061	0.563093	0.766965	0.522009	0.790569	0.82382	0.887132*	0.843661	0.907853	0.588348	0.531795	0.64736	0.818367	0.926855	0.331357	0.527171	0.642161	0.721955	0.142915	0.644301	0.307318	0.377446	0.141421	0.624579	0.147942	0.583309	0.504679	0.252203	0.593326	0.700404	0.150414	0.514259	0.774814	0.161621	0.187266	0.424839	0.374537	0.262613	0.318626	0.754474	0.680525	0.198932	0.678363	0.285714*
159	0.610328	0.60458*	0.360555	0.659768	0.425864	0.38083	0.57594	1	0.542965	0.790569	0.694019	0.682504*	0.847141	0.727046	0.552866	0.504261	0.627572	0.818367	0.8	0.382188	0.527171	0.763015	0.725304	0.150801	0.661032	0.317868	0.468165	0.1	0.593883	0.155406	0.510135	0.511725	0.252203	0.597162	0.700404	0.377124	0.496139	0.774814	0.161621	0.210533	0.409426	0.378746	0.26382	0.391077	0.754474	0.640184	0.18118	0.589015	0.333333*
160	0.708064	0.620174*	0.347875	0.342997	0.493511	0.415227	0.632456	0.943975	0.546781	0.796566	0.659966	0.531751*	0.775343	0.882843	0.556268	0.498926	0.710363	0.802773	0.761042	0.581238	0.544935	0.763015	0.737657	0.132385	0.642024	0.25889	0.470751	0.1	0.54848	0.175907	0.53738	0.5	0.263644	0.597162	0.783076	0.438667	0.496139	0.763941	0.161422	0.210533	0.480847	0.378746	0.296022	0.42357	0.764199	0.688021	0.278679	0.542326	0.328798*
161	0.691333	0.589256*	0.351479	0.237023	0.492568	0.373865	0.559017	0.917379	0.547981	0.782154	0.698301	0.516916*	0.793762	0.751312	0.582174	0.486554	0.746273	0.802773	0.870745	0.559017	0.574412	0.748562	0.737657	0.132385	0.633553	0.25047	0.46071	0.1	0.578655	0.175907	0.570826	0.428746	0.270563	0.597759	0.840348	0.272671	0.533494	0.763941	0.165074	0.210533	0.480847	0.345134	0.290751	0.466527	0.83205	0.622841	0.32596	0.613572	0.328798*
162	0.729625	0.63375*	0.347875	0.149906	0.374887	0.384553	0.667947	0.749656	0.606274	0.793762	0.808608	0.499784*	0.866859	0.680663	0.539072	0.542326	0.78187	0.97788	0.869227	0.614295	0.574412	0.630286	0.737657	0.175276	0.562557	0.25047	0.46428	0.112839	0.617611	0.194257	0.585206	0.430007	0.284255	0.567849	0.840348	0.203626	0.533494	0.763941	0.160334	0.210674	0.462464	0.353553	0.290751	0.464474	0.810515	0.582772	0.351237	0.592749	0.493197*
163	0.691333	0.620174*	0.345517	0.223607	0.421277	0.352873	0.707107	0.481664	0.620174	0.800735	0.90941	0.673114*	0.927119	0.55832	0.593883	0.528059	0.82645	0.930054	0.85885	0.675941	0.593552	0.681115	0.736073	0.227038	0.543928	0.254232	0.466881	0.088197	0.609208	0.227103	0.580635	0.415227	0.27221	0.567849	0.850871	0.103975	0.555803	0.784196	0.137677	0.206041	0.493197	0.322699	0.301679	0.464474	0.810515	0.588348	0.382188	0.632456	0.493197*
164	0.692863	0.581238*	0.329137	0.133038	0.421998	0.416732	0.691333	0.51131	0.615429	0.823217	1.0469	0.743938*	0.973505	0.575454	0.608735	0.469094	1	0.869171	0.800943	0.764199	0.593552	0.83205	0.724722	0.20351	0.516334	0.276533	0.444994	0.085436	0.591169	0.227103	0.577067	0.392232	0.27221	0.55784	0.747786	0.172005	0.55737	0.751532	0.138102	0.183375	0.493197	0.290508	0.299833	0.516864	0.810515	0.64748	0.340648	0.667947	0.657596*
165	0.663611	0.683486*	0.336592	0.149906	0.421998	0.400178	0.666667	0.522976	0.686099	0.823217	0.883072	0.729625*	0.923548	0.591169	0.608735	0.47375	0.951315	0.815711	0.800943	0.74957	0.614957	0.735215	0.724722	0.181062	0.744741	0.292096	0.468165	0.085436	0.604122	0.227103	0.577067	0.413401	0.342642	0.581016	0.746788	0.336336	0.55737	0.673593	0.09361	0.187559	0.536656	0.300995	0.367974	0.458634	0.810515	0.64748	0.345144	0.539072	0.707107*
166	0.766905	0.667237*	0.326058	0.237023	0.427999	0.499808	0.570088	0.527046	0.610533	0.909091	0.782154	0.760444*	0.857493	0.95956	0.632456	0.489999	0.851469	0.772862	0.834698	0.766965	0.614957	0.553066	0.738731	0.181062	0.685004	0.266544	0.331042	0.085436	0.6895	0.239426	0.551882	0.417274	0.342052	0.605837	0.791587	0.320092	0.575689	0.667192	0.09361	0.215777	0.503413	0.300995	0.394477	0.438667	0.740233	0.64748	0.33814	0.561591	0.485071*
167	0.754615	0.564333*	0.322467	0.299813	0.42357	0.530687	0.536293	0.509902	0.562331	0.905357	0.860026	0.744741*	0.714286	0.963113	0.626908	0.444994	0.847244	0.674949	0.819836	0.863911	0.614957	0.392232	0.794795	0.181062	0.55073	0.266544	0.364609	0.085436	0.763941	0.260144	0.57276	0.383677	0.320229	0.605837	0.707107	0.347498	0.615571	0.690671	0.101535	0.215777	0.613572	0.261488	0.419501	0.397151	0.740233	0.562784	0.346239	0.782154	0.242536*
168	0.713218	0.559017*	0.310373	0.261488	0.471405	0.485643	0.564859	0.379473	0.522009	0.669534	0.920447	0.765691*	0.766965	0.794966	0.47231	0.383482	0.872966	0.714163	0.819836	0.877058	0.574412	0.454077	0.823957	0.191866	0.507272	0.275869	0.364609	0.085436	0.745822	0.260144	0.57276	0.337954	0.320229	0.614367	0.729964	0.355519	0.550939	0.715777	0.117041	0.209698	0.460179	0.242729	0.419252	0.397151	0.729964	0.569928	0.346239	0.716432	0.395285*
169	0.713724	0.565916*	0.318663	0.261488	0.546496	0.535155	0.570529	0.298275	0.478322	0.75	0.9135	0.65569*	0.928477	0.931315	0.604292	0.320092	0.983129	0.573488	0.869227	0.695141	0.574412	0.454077	0.823957	0.17161	0.535373	0.275869	0.384148	0.067543	0.66774	0.267374	0.538138	0.318626	0.312067	0.614367	0.764199	0.395285	0.522438	0.742673	0.117041	0.187444	0.383482	0.239426	0.411333	0.228086	0.729964	0.588235	0.295378	0.669534	0.395285*
170	0.789893	0.575543*	0.310046	0.206725	0.597175	0.524939	0.512148	0.386494	0.503793	0.583333	1.0469	0.640312*	0.928477	0.644772	0.563093	0.255281	0.910642	0.568865	0.792465	0.798228	0.596795	0.350202	0.823957	0.17161	0.554469	0.307148	0.439026	0.083153	0.620174	0.212718	0.56328	0.266895	0.302807	0.614367	0.764199	0.693375	0.440454	0.836068	0.071796	0.171785	0.303137	0.273931	0.425013	0.23829	0.707107	0.594803	0.257621	0.671729	0.542326*
171	0.780811	0.688021*	0.302483	0.191741	0.512148	0.429266	0.535707	0.618123	0.518082	0.636364	1.05975	0.393159*	0.943616	0.742442	0.563093	0.207168	0.895045	0.613631	0.744247	0.734726	0.596795	0.669534	0.823957	0.17161	0.554469	0.269386	0.509266	0.083153	0.626099	0.206725	0.56328	0.115163	0.32059	0.598413	0.729964	0.419721	0.456273	0.856672	0.046399	0.171785	0.32196	0.289414	0.4	0.216637	0.681175	0.636364	0.405959	0.690335	0.307148*
172	0.854598	0.657231*	0.309649	0.217186	0.443042	0.487693	0.567596	0.665765	0.402357	0.747409	0.866859	0.418638*	0.667237	0.63892	0.488901	0.210352	0.78187	0.617331	0.752009	0.841406	0.556407	0.664822	0.823957	0.186146	0.625053	0.279508	0.565685	0.106	0.626099	0.214373	0.579017	0.160334	0.289508	0.59847	0.763997	0.447214	0.480954	0.796301	0.06576	0.179705	0.248452	0.27933	0.417612	0.251823	0.764199	0.566352	0.42626	0.734726	0.353553*
173	0.848939	5.568326*	0.309649	0.206725	0.382929	0.473029	0.467365	0.665765	0.378777	0.747409	0.874475	0.482573*	0.723241	0.624138	0.565685	0.236088	0.790024	0.666963	0.752009	0.63895	0.600851	0.682895	0.814266	0.194653	0.563337	0.279508	0.623267	0.106	0.639971	0.207734	0.545078	0.20905	0.272008	0.586989	0.744247	0.359908	0.451754	0.707107	0.06576	0.191721	0.248452	0.28748	0.389578	0.197546	0.829867	0.620174	0.408944	0.690335	0.353553*
174	0.79603	5.568326*	0.321285	0.27735	0.417274	0.512407	0.474831	0.665765	0.3386	0.583333	0.921221	0.543214*	0.818367	0.594449	0.707107	0.298474	0.784465	0.698244	0.765641	0.650659	0.60458	0.707107	0.835328	0.185537	0.575224	0.342405	0.738818	0.106	0.6	0.202031	0.511147	0.160334	0.27374	0.567849	0.716794	0.338643	0.418739	0.760716	0.115857	0.186091	0.423099	0.27735	0.378601	0.236208	0.843451	0.543214	0.389647	0.690335	0.5*
175	0.839112	5.881245*	0.321285	0.263117	0.378853	0.523053	0.482867	0.744348	0.294147	0.669534	0.990581	0.428571*	0.982194	0.400681	0.710634	0.212351	0.784465	0.759841	0.765641	0.364774	0.681175	0.712262	0.835328	0.185537	0.557086	0.368995	0.711494	0.106	0.630593	0.200852	0.493163	0.113373	0.280812	0.609706	0.749843	0.310087	0.413313	0.833716	0.115857	0.211178	0.464991	0.238586	0.311322	0.262613	0.843451	0.542326	0.396208	0.685004	0.632456*
176	0.88752	5.758565*	0.321285	0.292353	0.294086	0.509117	0.551112	0.651795	0.296374	0.747409	1.08278	0*	0.727273	0.34996	0.537603	0.187444	0.784465	0.767112	0.746577	0.314074	0.705588	0.59081	0.882316	0.196116	0.529999	0.387869	0.711494	0.123195	0.672673	0.181902	0.456821	0.162866	0.302784	0.609706	0.794966	0.310087	0.341362	0.826419	0.113519	0.228347	0.444994	0.230401	0.285044	0.181237	0.80685	0.506019	0.381655	0.704664	0.65192*
177	0.839112	6.628738*	0.323041	0.206725	0.307148	0.458748	0.606339	0.651795	0.299942	0.747409	1.03232		0.63375	0.229648	0.462464	0.174608	0.710363	0.754474	0.737564	0.306786	0.725895	0.527046	0.882316	0.189044	0.523504	0.391701	0.755483	0.131477	0.73841	0.201183	0.447214	0.212351	0.287247	0.60251	0.763935	0.350348	0.366557	0.785136	0.092923	0.224224	0.420511	0.222706	0.285044	0.138675	0.766965	0.511666	0.403796	0.704664	0.592749*
178	0.891359	6.628738*	0.323041	0.09245	0.32686	0.511194	0.534129	0.61808	0.299942	0.747409	0.955249		0.517727	0.579712	0.527046	0.176471	0.67873	0.758865	0.77201	0.280796	0.747786	0.594515	0.899133	0.209805	0.50218	0.297482	0.885316	0.131477	0.73641	0.181902	0.47737	0.162866	0.324157	0.596056	0.809938	0.323563	0.363551	0.739822	0.092923	0.213741	0.27735	0.208637	0.291548	0.141421	0.651795	0.541543	0.395444	0.734726	0.592749*
179	0.847244	6.093632*	0.310087	0.176777	0.380789	0.599092	0.504785	0.732084	0.316228	0.89298	1.02262		0.605783	0.299425	0.527046	0.210819	0.689622	0.754474	0.783402	0.25	0.747258	0.63561	0.89621	0.209805	0.541543	0.255904	0.892288	0.136781	0.704802	0.14315	0.515638	0.064416	0.340082	0.584103	0.779848	0.488397	0.402554	0.750444	0.092923	0.213741	0.210352	0.195594	0.291548	0.189737	0.723553	0.592638	0.395444	0.734726	0.328798*
180	0.947961	5.113153*	0.31905	0.125	0.430083	0.608617	0.528059	0.79421	0.324303	0.836315	1.02774		0.638508	0.212718	0.538462	0.2	0.701914	0.860026	0.728289	0.224756	0.651795	0.482019	0.903137	0.219735	0.549557	0.249567	0.942809	0.127607		0.14315	0.544016	0.064416	0.348184	0.580486	0.792687	0.440415	0.372161	0.837033	0.139384	0.197402	0	0.189737	0.267985	0.124035	0.757604	0.600812	0.395444	0.678363	0.166667*
