# Supplementary material for: Wnt- and glutamate-receptors orchestrate stem cell dynamics and asymmetric cell division
Source: eLife. 2021 May 24;10:e59791. doi: 10.7554/eLife.59791 (PMC8177892; doi:10.7554/eLife.59791)
Supplement: Figure 4—source data 1. [file elife-59791-fig4-data1.xlsx]

## Sheet: Figure 4
Panel C
time (min)	WT + Wnt3a beads	WT + iWnt3a beads		Averages for statistical analysis	WT + Wnt3a beads			WT + iWnt3a beads					Two-way ANOVA	Ordinary						Number of families	1
1	0.905831	0.956757		Track #	Average 1-30	Average 31-120 min	Average 121-180 min	Average 1-30	Average 31-120 min	Average 121-180 min			Alpha	0.05						Number of comparisons per family	3
2	0.837205	0.922495		1	1.20441	0.739156	0.705452	0.750157	0.923816	0.962347										Alpha	0.05
3	0.805732	0.89715		2				1.14399	0.665759	0.565366			Source of Variation	% of total variation	P value	P value summary	Significant?
4	0.773411	0.895315		3	0.868412	0.353938	0.342944	0.588962	0.555544	0.612146			Interaction	1.099	0.1236	ns	No			Šídák's multiple comparisons test	Predicted (LS) mean diff.	95.00% CI of diff.	Below threshold?	Summary	Adjusted P Value
5	0.773857	0.872913		4	0.815645	0.425246	0.202726	0.763546	0.651765	0.934993			Row Factor	8.642	<0.0001	****	Yes
6	0.770461	0.853052		5	0.93898	0.683067	0.442621	0.665737	0.450397	0.837104			Column Factor	17.63	<0.0001	****	Yes			WT Wnt3a - WT iWnt3a
7	0.757193	0.860434		6	0.70502	0.554622	0.525346	1.18858	1.24682	1.3116										0-30 min	-0.1202	-0.2138 to -0.02660	Yes	**	0.0067
8	0.738409	0.841187		7	0.697953	0.564574	0.517795	0.701417	0.566691	0.381374			ANOVA table	SS (Type III)	DF	MS	F (DFn, DFd)	P value		31-120 min	-0.2096	-0.3032 to -0.1160	Yes	****	<0.0001
9	0.722453	0.83853		8	0.724425	0.256392	0.458611	0.823302	0.750373	0.711708			Interaction	0.1518	2	0.07588	F (2, 279) = 2.106	P=0.1236		121-180 min	-0.2249	-0.3185 to -0.1313	Yes	****	<0.0001
10	0.719269	0.826487		9	0.848954	0.696803	0.524152	1.20256	0.697379	0.428485			Row Factor	1.193	2	0.5964	F (2, 279) = 16.56	P<0.0001
11	0.70246	0.80195		10	0.599341	0.431608	0.682569	0.646524	0.828581	0.523517			Column Factor	2.433	1	2.433	F (1, 279) = 67.55	P<0.0001
12	0.695907	0.811188		11	0.811145	0.839852	0.802988	0.648536	0.890495	0.654035			Residual	10.05	279	0.03602				Test details	Predicted (LS) mean 1	Predicted (LS) mean 2	Predicted (LS) mean diff.	SE of diff.	N1	N2	t	DF
13	0.700916	0.808955		12				0.737903	0.798359	0.710812
14	0.679227	0.822918		13	0.694998	0.70686	0.794401	1.13472	0.937639	0.782311			Difference between column means							WT Wnt3a - WT iWnt3a
15	0.68294	0.795433		14	0.645551	0.633122	0.711899	0.861213	0.928146	1.02925			Predicted (LS) mean of WT Wnt3a	0.5782						0-30 min	0.7013	0.8215	-0.1202	0.03896	46	49	3.085	279
16	0.682914	0.796402		15	0.873793	0.561712	0.575475	0.819846	0.510484	0.362713			Predicted (LS) mean of WT iWnt3a	0.7631						31-120 min	0.5306	0.7402	-0.2096	0.03896	46	49	5.38	279
17	0.666828	0.788385		16	0.55879	0.371257	0.421979	0.609537	0.662399	0.649517			Difference between predicted means	-0.1849						121-180 min	0.5027	0.7275	-0.2249	0.03896	46	49	5.771	279
18	0.664384	0.775781		17	0.647892	0.521558	0.689966	0.859815	0.727243	0.964164			SE of difference	0.0225
19	0.644015	0.790471		18	0.647811	0.595596	0.791513	1.0569	0.866896	0.676153			95% CI of difference	-0.2292 to -0.1406
20	0.65579	0.770313		19	0.76295	0.463401	0.824599	0.701758	0.72693	0.531737
21	0.692938	0.789912		20	0.738059	0.879351	0.535335	0.69279	0.724477	0.64775			Data summary
22	0.69904	0.780527		21	0.640901	0.673682	0.672468	0.813823	0.568272	0.86162			Number of columns (Column Factor)	2
23	0.676565	0.79302		22	0.760729	0.491721	0.699794	0.603155	0.400688	0.651592			Number of rows (Row Factor)	3
24	0.661958	0.790641		23	0.85892	0.863025	0.776317	0.85448	0.570447	0.795163			Number of values	285
25	0.642856	0.779032		24	0.539079	0.251308	0.164677	0.996081	0.682194	0.661238
26	0.636004	0.787584		25	0.880143	0.734191	0.533237	0.907585	0.864951	0.845857
27	0.626927	0.806038		26	0.769884	0.454087	0.409103	0.944039	0.859598	0.811542
28	0.61081	0.812639		27	0.807503	0.756686	0.612687	0.935567	0.972006	0.95369
29	0.611371	0.787139		28	0.612618	0.327383	0.122968	0.627297	0.726507	0.69742
30	0.602601	0.793379		29	0.736816	0.866379	0.628955	0.550979	0.896683	1.02719
31	0.596584	0.783696		30	0.791755	0.641355	0.234074	0.921036	0.742553	0.898516
32	0.588828	0.785683		31	0.593414	0.552263	0.492929	1.04825	0.835585	0.626795
33	0.583059	0.791864		32	0.546397	0.456392	0.372616	0.663546	0.780888	0.89821
34	0.548755	0.78882		33	0.766695	0.535482	0.263926	0.923268	0.691765	0.513291
35	0.558615	0.801488		34	0.440058	0.370421	0.547096	0.650145	0.287611	0.202937
36	0.556669	0.800433		35	0.731635	0.526589	0.721206	0.720888	0.957902	0.840056
37	0.555232	0.798387		36	0.608333	0.301622	0.29811	0.364587	0.547931	0.6228
38	0.558002	0.795614		37	0.479114	0.350635	0.468734	0.976353	0.939997	0.680175
39	0.548465	0.797222		38	0.887277	0.746761	0.753606	1.14822	0.620234	0.412059
40	0.546384	0.784134		39	0.633528	0.328783	0.146616	0.489059	0.393836	0.471297
41	0.562657	0.79745		40	0.709795	0.399079	0.206616	0.740988	0.786895	0.789463
42	0.56207	0.815448		41	0.614946	0.549867	0.416005	0.372702	0.437428	0.706732
43	0.56008	0.793649		42	0.412435	0.27744	0.260018	0.804112	0.880521	0.786425
44	0.561336	0.777827		43	0.551569	0.3672	0.25234	0.876745	1.06628	0.912658
45	0.551337	0.778467		44	0.658508	0.336528	0.301367	0.916431	0.78671	0.700762
46	0.544451	0.780027		45	0.418143	0.423736	0.583498	0.865295	0.72107	0.941046
47	0.552295	0.769512		46	0.47896	0.599667	0.652827
48	0.545991	0.775504		47	0.632195	0.299447	0.349536	1.11659	0.671318	0.949917
49	0.536431	0.755923		48	0.916274	0.649208	0.63079	0.754471	0.864939	0.688363
50	0.541855	0.746985		49				0.956237	0.701682	0.647319
51	0.548228	0.777518		50				1.11546	0.905111	0.778235
52	0.545771	0.775017
53	0.541208	0.75838		Track count	46	46	46	49	49	49
54	0.549524	0.721615		Average	0.701342	0.530632	0.502663	0.821534	0.740241	0.72754
55	0.547631	0.744374
56	0.519687	0.740262
57	0.540683	0.749131
58	0.538349	0.759083
59	0.523687	0.770734
60	0.519614	0.761731
61	0.535225	0.714733
62	0.556578	0.725446
63	0.558918	0.718812
64	0.54991	0.750783
65	0.529424	0.77718
66	0.534775	0.772907
67	0.533071	0.754535
68	0.519644	0.758114
69	0.515238	0.772264
70	0.513782	0.774437
71	0.516283	0.758696
72	0.535644	0.763526
73	0.523669	0.767862
74	0.529308	0.744026
75	0.520489	0.744047
76	0.513931	0.750272
77	0.526678	0.755727
78	0.530132	0.762137
79	0.523614	0.744018
80	0.517016	0.737313
81	0.528478	0.735329
82	0.513971	0.731312
83	0.503003	0.733366
84	0.498443	0.731595
85	0.511617	0.706939
86	0.519297	0.713944
87	0.519258	0.727969
88	0.51864	0.714586
89	0.502633	0.714451
90	0.500979	0.724077
91	0.524113	0.766837
92	0.519845	0.738142
93	0.508803	0.722791
94	0.502741	0.718597
95	0.502569	0.727234
96	0.497528	0.732299
97	0.491413	0.734647
98	0.493478	0.744995
99	0.511592	0.73403
100	0.51464	0.700891
101	0.5181	0.686877
102	0.525746	0.688166
103	0.524024	0.670665
104	0.518234	0.695602
105	0.539872	0.706535
106	0.518404	0.698082
107	0.513006	0.704063
108	0.520889	0.683488
109	0.531883	0.686093
110	0.522892	0.678098
111	0.526923	0.671596
112	0.524347	0.675938
113	0.541896	0.683088
114	0.52335	0.687098
115	0.536705	0.67979
116	0.525071	0.714833
117	0.521019	0.68753
118	0.510241	0.703401
119	0.506031	0.673759
120	0.508358	0.670124
121	0.498016	0.676369
122	0.49344	0.713729
123	0.496745	0.736342
124	0.487314	0.726652
125	0.481146	0.712059
126	0.477425	0.711872
127	0.491259	0.754157
128	0.487598	0.71955
129	0.499883	0.703899
130	0.489063	0.713307
131	0.495001	0.710249
132	0.50036	0.710724
133	0.485482	0.674036
134	0.502533	0.696451
135	0.497318	0.701949
136	0.508263	0.690478
137	0.508281	0.734455
138	0.501508	0.743002
139	0.492371	0.747915
140	0.50098	0.74673
141	0.492202	0.729672
142	0.495949	0.741713
143	0.502526	0.755594
144	0.495954	0.765289
145	0.483804	0.763362
146	0.481841	0.762176
147	0.483817	0.738185
148	0.4876	0.737753
149	0.485517	0.744913
150	0.482936	0.751186
151	0.483973	0.730295
152	0.503504	0.746819
153	0.51203	0.742442
154	0.522709	0.732958
155	0.525164	0.734884
156	0.514266	0.733654
157	0.520608	0.728154
158	0.515823	0.730115
159	0.520928	0.729401
160	0.531188	0.728078
161	0.527558	0.742976
162	0.528113	0.714969
163	0.529342	0.721009
164	0.535978	0.725706
165	0.536142	0.716587
166	0.537238	0.723961
167	0.535186	0.707504
168	0.514995	0.69006
169	0.512416	0.671145
170	0.506069	0.689312
171	0.50999	0.713648
172	0.505614	0.724735
173	0.497188	0.733219
174	0.507703	0.717447
175	0.50766	0.713747
176	0.49387	0.738704
177	0.481191	0.764814
178	0.480946	0.755311
179	0.492008	0.770817
180	0.481012	0.766158
Average	0.549743	0.749556
Track count in average	46	49
Panel D
time (min)	WT + Wnt3a beads (repeated from C)	Lrp5KO (#1)	Lrp5KO (#2)		Averages for statistical analysis	WT + Wnt3a bead (repeated from C)			Lrp5KO (#1)			Lrp5KO (#2)					Two-way ANOVA	Ordinary						Number of families	3
1	0.905831	1.0756	1.03642		Track #	Average 1-30	Average 31-120 min	Average 121-180 min	Average 1-30	Average 31-120 min	Average 121-180 min	Average 1-30	Average 31-120 min	Average 121-180 min			Alpha	0.05						Number of comparisons per family	2
2	0.837205	1.06326	1.0335		1	1.20441	0.739156	0.705452	1.098	0.624407	0.39844	0.608432	0.498451	0.450603										Alpha	0.05
3	0.805732	1.06658	0.920366		2				1.0312	0.897855	0.568055	0.693497	0.52421	0.575819			Source of Variation	% of total variation	P value	P value summary	Significant?
4	0.773411	1.04513	0.869189		3	0.868412	0.353938	0.342944	1.20702	0.797965	0.850096	0.631883	0.618077	0.57443			Interaction	1.606	0.0725	ns	No			Dunnett's multiple comparisons test	Predicted (LS) mean diff.	95.00% CI of diff.	Below threshold?	Summary	Adjusted P Value		Test details	Predicted (LS) mean 1	Predicted (LS) mean 2	Predicted (LS) mean diff.	SE of diff.	N1	N2	q	DF
5	0.773857	1.01223	0.819185		4	0.815645	0.425246	0.202726	0.999241	0.868692	0.575756	0.604315	0.512248	0.362184			Row Factor	14.35	<0.0001	****	Yes
6	0.770461	0.98755	0.770102		5	0.93898	0.683067	0.442621	1.21107	0.645897	0.475576	0.437218	0.477516	0.574787			Column Factor	10.76	<0.0001	****	Yes			0-30 min
7	0.757193	0.932511	0.745507		6	0.70502	0.554622	0.525346	0.976784	0.865583	0.741788	0.561496	0.40252	0.495714										WT Wnt3a vs. Lrp5KO #1	-0.1585	-0.2409 to -0.07616	Yes	****	<0.0001		WT Wnt3a vs. Lrp5KO #1	0.7013	0.8599	-0.1585	0.03707	46	49	4.277	390
8	0.738409	0.887364	0.719993		7	0.697953	0.564574	0.517795	1.00961	0.821588	0.847396	0.652702	0.349234	0.42891			ANOVA table	SS (Type III)	DF	MS	F (DFn, DFd)	P value		WT Wnt3a vs. Lrp5KO #2	0.02274	-0.06521 to 0.1107	No	ns	0.791		WT Wnt3a vs. Lrp5KO #2	0.7013	0.6786	0.02274	0.03958	46	38	0.5745	390
9	0.722453	0.874792	0.67831		8	0.724425	0.256392	0.458611	0.590475	0.379449	0.407148	0.805135	0.606842	0.572051			Interaction	0.2821	4	0.07052	F (4, 390) = 2.163	P=0.0725
10	0.719269	0.841866	0.670707		9	0.848954	0.696803	0.524152	0.796527	0.406833	0.452112	0.748871	0.406304	0.510328			Row Factor	2.521	2	1.26	F (2, 390) = 38.67	P<0.0001		0-30 min
11	0.70246	0.818042	0.661823		10	0.599341	0.431608	0.682569	0.756009	0.605122	0.480549	0.73528	0.752458	0.807628			Column Factor	1.89	2	0.9452	F (2, 390) = 28.99	P<0.0001		WT Wnt3a vs. Lrp5KO #1	-0.1818	-0.2642 to -0.09942	Yes	****	<0.0001		WT Wnt3a vs. Lrp5KO #1	0.5306	0.7124	-0.1818	0.03707	46	49	4.904	390
12	0.695907	0.793038	0.647309		11	0.811145	0.839852	0.802988	0.540663	0.495888	0.724403	0.548111	0.512086	0.580667			Residual	12.71	390	0.0326				WT Wnt3a vs. Lrp5KO #2	-0.009021	-0.09697 to 0.07893	No	ns	0.9631		WT Wnt3a vs. Lrp5KO #2	0.5306	0.5397	-0.009021	0.03958	46	38	0.2279	390
13	0.700916	0.78904	0.633672		12				0.588146	0.370645	0.596864	0.347448	0.178031	0.29933
14	0.679227	0.79917	0.635619		13	0.694998	0.70686	0.794401	0.798852	1.01538	0.823228	0.8848	0.819816	0.795999			Data summary							0-30 min
15	0.68294	0.799542	0.632618		14	0.645551	0.633122	0.711899	0.804214	0.380802	0.446628	1.02958	0.485641	0.562736			Number of columns (Column Factor)	3						WT Wnt3a vs. Lrp5KO #1	-0.1115	-0.1939 to -0.02913	Yes	**	0.0054		WT Wnt3a vs. Lrp5KO #1	0.5027	0.6142	-0.1115	0.03707	46	49	3.008	390
16	0.682914	0.797452	0.628348		15	0.873793	0.561712	0.575475	0.793255	0.556943	0.45967	0.806744	0.602242	0.667628			Number of rows (Row Factor)	3						WT Wnt3a vs. Lrp5KO #2	-0.07212	-0.1601 to 0.01583	No	ns	0.1243		WT Wnt3a vs. Lrp5KO #2	0.5027	0.5748	-0.07212	0.03958	46	38	1.822	390
17	0.666828	0.80498	0.612894		16	0.55879	0.371257	0.421979	0.919998	0.991896	1.0394	0.87182	0.727252	0.648047			Number of values	399
18	0.664384	0.795919	0.593612		17	0.647892	0.521558	0.689966	1.11287	0.613868	0.264274	0.67348	0.440068	0.440331
19	0.644015	0.80862	0.608316		18	0.647811	0.595596	0.791513	0.806002	1.05671	1.08828	0.692046	0.550921	0.700465
20	0.65579	0.827614	0.59944		19	0.76295	0.463401	0.824599	1.12002	1.07184	0.616665	0.496835	0.470804	0.52061
21	0.692938	0.821441	0.61021		20	0.738059	0.879351	0.535335	1.13866	0.691568	0.27168	0.720568	0.696446	0.683977
22	0.69904	0.799065	0.581754		21	0.640901	0.673682	0.672468	0.443533	0.50159	0.456157	0.676382	0.743017	0.625484
23	0.676565	0.797022	0.593511		22	0.760729	0.491721	0.699794				0.449859	0.496672	0.580846
24	0.661958	0.796116	0.600968		23	0.85892	0.863025	0.776317	1.09834	0.695999	0.742742	0.709061	0.608979	0.687708
25	0.642856	0.796792	0.596428		24	0.539079	0.251308	0.164677	1.22821	0.83908	0.389238	0.833455	0.663419	0.494901
26	0.636004	0.80173	0.579414		25	0.880143	0.734191	0.533237	0.679806	0.647078	0.612857	0.655616	0.75744	0.776461
27	0.626927	0.791985	0.574295		26	0.769884	0.454087	0.409103	0.660914	0.802944	0.916973	0.616466	0.723338	0.672616
28	0.61081	0.795245	0.578189		27	0.807503	0.756686	0.612687	0.772353	0.687293	0.666304	0.498814	0.574141	0.821028
29	0.611371	0.792872	0.564199		28	0.612618	0.327383	0.122968	0.664855	0.665655	0.699234	0.962226	0.699259	0.833823
30	0.602601	0.783509	0.562211		29	0.736816	0.866379	0.628955	0.850533	0.894202	0.728839	0.680447	0.445923	0.673965
31	0.596584	0.787394	0.565171		30	0.791755	0.641355	0.234074	0.511442	0.322974	0.19649	0.659397	0.381446	0.453322
32	0.588828	0.788973	0.566422		31	0.593414	0.552263	0.492929	0.870132	0.590988	0.460026	0.873387	0.547738	0.463182
33	0.583059	0.763617	0.545034		32	0.546397	0.456392	0.372616	0.673768	0.649568	0.381635	0.524202	0.436001	0.540982
34	0.548755	0.771585	0.560809		33	0.766695	0.535482	0.263926	0.980036	1.02223	0.987093	0.630307	0.477803	0.459056
35	0.558615	0.753954	0.567833		34	0.440058	0.370421	0.547096	0.803413	0.623617	0.874409	0.534455	0.416235	0.592608
36	0.556669	0.763292	0.567958		35	0.731635	0.526589	0.721206	0.725988	0.526424	0.367815	0.746724	0.595245	0.570589
37	0.555232	0.761063	0.560093		36	0.608333	0.301622	0.29811	0.63694	0.833753	0.728079	0.758522	0.442571	0.575242
38	0.558002	0.763392	0.567413		37	0.479114	0.350635	0.468734	0.636067	0.687673	0.561206	0.739695	0.380856	0.306227
39	0.548465	0.740202	0.583749		38	0.887277	0.746761	0.753606	1.01167	0.97368	0.962402	0.687659	0.485535	0.461643
40	0.546384	0.769831	0.572621		39	0.633528	0.328783	0.146616	0.661701	0.694497	0.378019
41	0.562657	0.791768	0.548114		40	0.709795	0.399079	0.206616	0.994593	0.689687	0.542264
42	0.56207	0.782938	0.54715		41	0.614946	0.549867	0.416005	0.660378	0.807026	0.703373
43	0.56008	0.803412	0.528997		42	0.412435	0.27744	0.260018	0.893085	0.451086	0.543421
44	0.561336	0.786198	0.524555		43	0.551569	0.3672	0.25234	0.776515	0.905217	0.776922
45	0.551337	0.768318	0.519892		44	0.658508	0.336528	0.301367	0.935711	0.982231	0.848764
46	0.544451	0.771314	0.517884		45	0.418143	0.423736	0.583498	0.831933	0.972569	0.54033
47	0.552295	0.775644	0.500689		46	0.47896	0.599667	0.652827	0.758859	0.338439	0.4562
48	0.545991	0.774956	0.502895		47	0.632195	0.299447	0.349536	0.957356	0.673028	0.552938
49	0.536431	0.781466	0.513904		48	0.916274	0.649208	0.63079	1.07961	0.663346	0.425994
50	0.541855	0.754118	0.522996		49				1.08967	0.652923	0.493506
51	0.548228	0.751333	0.529804		50				0.94754	0.954866	0.972557
52	0.545771	0.7581	0.536915
53	0.541208	0.749827	0.541199		Track count	46	46	46	49	49	49	38	38	38
54	0.549524	0.767932	0.544814		Average	0.701342	0.530632	0.502663	0.859869	0.71242	0.614159	0.678603	0.539652	0.574788
55	0.547631	0.750752	0.538471
56	0.519687	0.740287	0.534559
57	0.540683	0.739976	0.537961
58	0.538349	0.744052	0.541821
59	0.523687	0.741461	0.5571
60	0.519614	0.707689	0.523764
61	0.535225	0.681112	0.522153
62	0.556578	0.680696	0.528293
63	0.558918	0.682556	0.538829
64	0.54991	0.696385	0.515509
65	0.529424	0.692446	0.533841
66	0.534775	0.684555	0.534075
67	0.533071	0.697947	0.529803
68	0.519644	0.71088	0.551446
69	0.515238	0.688289	0.559545
70	0.513782	0.726049	0.566743
71	0.516283	0.712713	0.558004
72	0.535644	0.717321	0.564137
73	0.523669	0.715347	0.581753
74	0.529308	0.717772	0.567272
75	0.520489	0.707754	0.574488
76	0.513931	0.740786	0.567485
77	0.526678	0.739121	0.562601
78	0.530132	0.740167	0.538688
79	0.523614	0.760602	0.534655
80	0.517016	0.7654	0.52979
81	0.528478	0.741129	0.512544
82	0.513971	0.751416	0.516917
83	0.503003	0.744791	0.516993
84	0.498443	0.731567	0.520835
85	0.511617	0.737606	0.53082
86	0.519297	0.71538	0.522109
87	0.519258	0.694368	0.544135
88	0.51864	0.69137	0.551816
89	0.502633	0.667832	0.545147
90	0.500979	0.667939	0.534849
91	0.524113	0.679007	0.524382
92	0.519845	0.678109	0.538293
93	0.508803	0.66493	0.510109
94	0.502741	0.646692	0.53211
95	0.502569	0.68201	0.532692
96	0.497528	0.682578	0.538412
97	0.491413	0.687408	0.537838
98	0.493478	0.673384	0.516955
99	0.511592	0.677738	0.515347
100	0.51464	0.655798	0.519234
101	0.5181	0.685677	0.510316
102	0.525746	0.675195	0.507117
103	0.524024	0.671758	0.546546
104	0.518234	0.683348	0.523549
105	0.539872	0.668609	0.530377
106	0.518404	0.676564	0.531269
107	0.513006	0.693029	0.538207
108	0.520889	0.682308	0.537727
109	0.531883	0.672112	0.559797
110	0.522892	0.678589	0.553502
111	0.526923	0.648203	0.558746
112	0.524347	0.628329	0.542894
113	0.541896	0.635513	0.546693
114	0.52335	0.627494	0.528691
115	0.536705	0.615234	0.540277
116	0.525071	0.628723	0.54861
117	0.521019	0.625105	0.54571
118	0.510241	0.628158	0.548636
119	0.506031	0.630105	0.547728
120	0.508358	0.630001	0.531081
121	0.498016	0.624645	0.540141
122	0.49344	0.618695	0.549654
123	0.496745	0.59098	0.560881
124	0.487314	0.598725	0.574073
125	0.481146	0.616283	0.560536
126	0.477425	0.624121	0.588259
127	0.491259	0.647942	0.584154
128	0.487598	0.64988	0.600559
129	0.499883	0.651583	0.589527
130	0.489063	0.624624	0.574759
131	0.495001	0.622734	0.588122
132	0.50036	0.644361	0.572184
133	0.485482	0.635635	0.562519
134	0.502533	0.653305	0.595236
135	0.497318	0.653506	0.59497
136	0.508263	0.6697	0.59743
137	0.508281	0.66452	0.594354
138	0.501508	0.665232	0.605642
139	0.492371	0.645382	0.605622
140	0.50098	0.628492	0.612183
141	0.492202	0.637143	0.611106
142	0.495949	0.636062	0.622562
143	0.502526	0.627951	0.599761
144	0.495954	0.623519	0.584199
145	0.483804	0.618927	0.563029
146	0.481841	0.607286	0.554809
147	0.483817	0.612921	0.572198
148	0.4876	0.597214	0.574393
149	0.485517	0.59967	0.562227
150	0.482936	0.608402	0.537002
151	0.483973	0.598407	0.547271
152	0.503504	0.588249	0.565623
153	0.51203	0.586427	0.563779
154	0.522709	0.583362	0.556238
155	0.525164	0.574446	0.563779
156	0.514266	0.57829	0.574987
157	0.520608	0.595835	0.573561
158	0.515823	0.584012	0.555592
159	0.520928	0.588385	0.558822
160	0.531188	0.594392	0.558273
161	0.527558	0.605953	0.560719
162	0.528113	0.604633	0.556797
163	0.529342	0.609169	0.562944
164	0.535978	0.596314	0.568598
165	0.536142	0.611134	0.567138
166	0.537238	0.598522	0.576465
167	0.535186	0.591952	0.569616
168	0.514995	0.578767	0.571555
169	0.512416	0.583711	0.581833
170	0.506069	0.58934	0.579122
171	0.50999	0.598071	0.571539
172	0.505614	0.594803	0.559621
173	0.497188	0.596634	0.560945
174	0.507703	0.602332	0.563551
175	0.50766	0.616667	0.569751
176	0.49387	0.607306	0.577331
177	0.481191	0.619307	0.599294
178	0.480946	0.633826	0.59318
179	0.492008	0.613391	0.577983
180	0.481012	0.626465	0.569255
Average	0.549743	0.704241	0.574523
Track count in average	46	49	38
Panel E
time (min)	WT + Wnt3a beads (repeated from C)	Lrp6KO (#1)	Lrp6KO (#2)		Averages for statistical analysis	WT + Wnt3a beads (repeated from C)			Lrp6KO (#1)			Lrp6KO (#2)					Two-way ANOVA	Ordinary						Number of families	3
1	0.905831	1.10432	1.05286		Track #	Average 1-30	Average 31-120 min	Average 121-180 min	Average 1-30	Average 31-120 min	Average 121-180 min	Average 1-30	Average 31-120 min	Average 121-180 min			Alpha	0.05						Number of comparisons per family	2
2	0.837205	1.08004	1.02755		1	1.20441	0.739156	0.705452	0.744009	0.752522	0.828222	0.586333	0.53909	1.27784										Alpha	0.05
3	0.805732	1.05564	0.986871		2				1.20494	1.03997	0.844391	0.836925	0.625628	0.551861			Source of Variation	% of total variation	P value	P value summary	Significant?
4	0.773411	1.03136	0.943075		3	0.868412	0.353938	0.342944	0.934562	0.815223	0.789521	0.841022	0.626162	0.856338			Interaction	1.24	0.126	ns	No			Dunnett's multiple comparisons test	Predicted (LS) mean diff.	95.00% CI of diff.	Below threshold?	Summary	Adjusted P Value		Test details	Predicted (LS) mean 1	Predicted (LS) mean 2	Predicted (LS) mean diff.	SE of diff.	N1	N2	q	DF
5	0.773857	1.05047	0.893925		4	0.815645	0.425246	0.202726	0.97373	0.504927	0.272185	0.758306	0.547915	0.787984			Row Factor	12.26	<0.0001	****	Yes
6	0.770461	1.01069	0.876141		5	0.93898	0.683067	0.442621	1.14817	0.896782	0.512965	0.680148	0.700639	0.798646			Column Factor	15.67	<0.0001	****	Yes			0-30 min
7	0.757193	0.987853	0.807284		6	0.70502	0.554622	0.525346	1.15446	0.815883	0.945633	0.783461	0.551984	0.701092										WT Wnt3a vs. Lrp6KO #1	-0.1755	-0.2560 to -0.09501	Yes	****	<0.0001		WT Wnt3a vs. Lrp6KO #1	0.7013	0.8769	-0.1755	0.03628	46	47	4.837	414
8	0.738409	0.955652	0.791825		7	0.697953	0.564574	0.517795	0.777541	0.590139	0.8189	0.92383	0.357794	0.618555			ANOVA table	SS (Type III)	DF	MS	F (DFn, DFd)	P value		WT Wnt3a vs. Lrp6KO #2	-0.1031	-0.1832 to -0.02302	Yes	**	0.0087		WT Wnt3a vs. Lrp6KO #2	0.7013	0.8045	-0.1031	0.0361	46	48	2.856	414
9	0.722453	0.906564	0.810734		8	0.724425	0.256392	0.458611	0.715738	0.536503	0.338571	0.720988	0.616929	0.750797			Interaction	0.2216	4	0.0554	F (4, 414) = 1.810	P=0.1260
10	0.719269	0.903123	0.816596		9	0.848954	0.696803	0.524152	0.652886	0.521878	0.78515	0.762117	0.748832	0.559983			Row Factor	2.19	2	1.095	F (2, 414) = 35.78	P<0.0001		31-120 min
11	0.70246	0.870491	0.791625		10	0.599341	0.431608	0.682569	0.610983	0.681994	0.86429	0.952449	0.717196	0.510266			Column Factor	2.799	2	1.4	F (2, 414) = 45.73	P<0.0001		WT Wnt3a vs. Lrp6KO #1	-0.2042	-0.2847 to -0.1237	Yes	****	<0.0001		WT Wnt3a vs. Lrp6KO #1	0.5306	0.7349	-0.2042	0.03628	46	47	5.628	414
12	0.695907	0.874676	0.794935		11	0.811145	0.839852	0.802988	0.874494	0.995547	0.767495	0.906119	0.922623	0.91247			Residual	12.67	414	0.03061				WT Wnt3a vs. Lrp6KO #2	-0.1609	-0.2410 to -0.08078	Yes	****	<0.0001		WT Wnt3a vs. Lrp6KO #2	0.5306	0.6915	-0.1609	0.0361	46	48	4.457	414
13	0.700916	0.873984	0.816696		12				0.735145	0.488455	0.571454	0.701235	0.699452	0.780333
14	0.679227	0.878029	0.810108		13	0.694998	0.70686	0.794401	1.27844	0.58339	0.481716	0.725319	0.532114	0.593611			Data summary							121-180 min
15	0.68294	0.880587	0.782295		14	0.645551	0.633122	0.711899	1.03354	0.753163	0.951225	0.761997	0.744015	0.981839			Number of columns (Column Factor)	3						WT Wnt3a vs. Lrp6KO #1	-0.174	-0.2546 to -0.09354	Yes	****	<0.0001		WT Wnt3a vs. Lrp6KO #1	0.5027	0.6767	-0.174	0.03628	46	47	4.797	414
16	0.682914	0.835842	0.781936		15	0.873793	0.561712	0.575475	0.883022	0.469207	0.443885	1.09209	0.999221	0.853118			Number of rows (Row Factor)	3						WT Wnt3a vs. Lrp6KO #2	-0.216	-0.2961 to -0.1359	Yes	****	<0.0001		WT Wnt3a vs. Lrp6KO #2	0.5027	0.7186	-0.216	0.0361	46	48	5.983	414
17	0.666828	0.810918	0.775865		16	0.55879	0.371257	0.421979	0.785286	0.917111	1.00023	0.701083	0.596556	0.617261			Number of values	423
18	0.664384	0.821466	0.757183		17	0.647892	0.521558	0.689966				0.78323	0.540687	0.47973
19	0.644015	0.834978	0.760868		18	0.647811	0.595596	0.791513	0.669489	0.873371	0.827407	0.748484	0.626643	0.586237
20	0.65579	0.807318	0.772441		19	0.76295	0.463401	0.824599	0.969384	0.787499	0.433724	0.848143	0.705253	0.677426
21	0.692938	0.813516	0.761661		20	0.738059	0.879351	0.535335	0.831656	0.436142	0.463701	0.834362	0.975739	0.878993
22	0.69904	0.79148	0.744206		21	0.640901	0.673682	0.672468	0.834471	1.00872	0.998749	0.627318	0.70611	0.578048
23	0.676565	0.767186	0.737843		22	0.760729	0.491721	0.699794	0.858222	0.81099	0.919356	0.956145	0.984677	0.642119
24	0.661958	0.771492	0.740475		23	0.85892	0.863025	0.776317				0.90275	0.619959	0.483762
25	0.642856	0.756755	0.724718		24	0.539079	0.251308	0.164677	0.771346	0.450119	0.569542	0.743282	0.859447	0.888737
26	0.636004	0.770464	0.737791		25	0.880143	0.734191	0.533237	0.98315	0.96049	0.900613	0.881345	0.750304	0.775015
27	0.626927	0.777859	0.724702		26	0.769884	0.454087	0.409103	0.905634	0.917775	1.01005	0.763995	0.646245	0.391013
28	0.61081	0.781661	0.709639		27	0.807503	0.756686	0.612687	0.826906	0.741324	0.742525	0.934934	0.661452	0.756691
29	0.611371	0.760718	0.709244		28	0.612618	0.327383	0.122968	0.850632	0.721356	0.489419	0.820996	0.76655	0.661592
30	0.602601	0.740911	0.692513		29	0.736816	0.866379	0.628955	0.859451	0.667807	0.545704	0.735912	0.537794	0.471565
31	0.596584	0.731546	0.689489		30	0.791755	0.641355	0.234074	0.748749	0.544413	0.61786	0.81429	0.749435	0.709243
32	0.588828	0.734357	0.70758		31	0.593414	0.552263	0.492929	0.80548	0.761784	0.703307	1.03157	0.651308	0.687081
33	0.583059	0.732311	0.721159		32	0.546397	0.456392	0.372616	0.935382	0.960964	1.08556	0.870297	0.456617	0.675265
34	0.548755	0.744599	0.727455		33	0.766695	0.535482	0.263926	0.963648	0.799553	0.358841	0.702945	0.558096	0.580174
35	0.558615	0.760507	0.715752		34	0.440058	0.370421	0.547096	0.60565	0.925623	0.798333	0.96782	1.00891	0.952064
36	0.556669	0.763011	0.685322		35	0.731635	0.526589	0.721206	1.01274	0.600782	0.454552	1.04546	0.842005	0.90681
37	0.555232	0.766222	0.674672		36	0.608333	0.301622	0.29811	0.810456	0.269408	0.402927	0.766798	0.607975	0.799624
38	0.558002	0.763225	0.689671		37	0.479114	0.350635	0.468734	0.763461	0.670652	0.543503	0.928933	0.812579	0.879383
39	0.548465	0.738659	0.676325		38	0.887277	0.746761	0.753606	0.950639	0.831722	0.714595	0.941637	0.75653	0.897573
40	0.546384	0.757163	0.679375		39	0.633528	0.328783	0.146616	1.04555	0.734414	0.607048	0.890038	0.828392	0.580348
41	0.562657	0.742195	0.661957		40	0.709795	0.399079	0.206616	0.757137	0.580845	0.347128	0.49597	0.789484	0.549968
42	0.56207	0.722835	0.669262		41	0.614946	0.549867	0.416005	1.10575	1.01936	0.645111	0.61077	0.564811	0.59611
43	0.56008	0.727665	0.680571		42	0.412435	0.27744	0.260018	0.604265	0.351447	0.371449	0.736037	0.633906	0.654784
44	0.561336	0.73857	0.690144		43	0.551569	0.3672	0.25234	0.793383	0.688468	0.807103	0.763742	0.474022	0.517913
45	0.551337	0.748054	0.691761		44	0.658508	0.336528	0.301367	1.13379	0.879937	0.623841	0.746169	0.805577	0.882566
46	0.544451	0.779715	0.676283		45	0.418143	0.423736	0.583498	0.97252	0.850444	0.966677	0.681982	0.702688	0.846544
47	0.552295	0.793832	0.679942		46	0.47896	0.599667	0.652827	0.76107	0.868441	0.507548	0.552461	0.495211	0.644796
48	0.545991	0.761975	0.671467		47	0.632195	0.299447	0.349536	0.850433	0.594798	0.773103	0.955736	0.84394	0.930885
49	0.536431	0.742962	0.679199		48	0.916274	0.649208	0.63079	1.14158	0.952295	0.573586	0.796797	0.703967	0.779888
50	0.541855	0.715164	0.670602		49
51	0.548228	0.709476	0.681885		50				0.58383	0.914399	0.786712
52	0.545771	0.697342	0.688567
53	0.541208	0.700483	0.683089		Track count	46	46	46	47	47	47	48	48	48
54	0.549524	0.706168	0.692796		Average	0.701342	0.530632	0.502663	0.876868	0.734852	0.676711	0.804454	0.69151	0.718624
55	0.547631	0.721181	0.698467
56	0.519687	0.724713	0.693017
57	0.540683	0.713131	0.699282
58	0.538349	0.720231	0.707577
59	0.523687	0.72658	0.702936
60	0.519614	0.752589	0.687116
61	0.535225	0.756991	0.679959
62	0.556578	0.750733	0.695078
63	0.558918	0.759439	0.720596
64	0.54991	0.772824	0.698523
65	0.529424	0.783819	0.68654
66	0.534775	0.788972	0.674515
67	0.533071	0.779301	0.66725
68	0.519644	0.767041	0.686884
69	0.515238	0.773227	0.681616
70	0.513782	0.772145	0.68162
71	0.516283	0.751133	0.672206
72	0.535644	0.744667	0.683467
73	0.523669	0.736525	0.685024
74	0.529308	0.726571	0.685302
75	0.520489	0.715452	0.668174
76	0.513931	0.730379	0.670023
77	0.526678	0.745577	0.675901
78	0.530132	0.737927	0.689399
79	0.523614	0.735916	0.684712
80	0.517016	0.743446	0.664914
81	0.528478	0.753834	0.662153
82	0.513971	0.769069	0.659424
83	0.503003	0.735328	0.644541
84	0.498443	0.7035	0.641649
85	0.511617	0.717758	0.646953
86	0.519297	0.735906	0.655103
87	0.519258	0.737123	0.647474
88	0.51864	0.728164	0.653395
89	0.502633	0.716422	0.659571
90	0.500979	0.704393	0.677993
91	0.524113	0.710878	0.691316
92	0.519845	0.737232	0.696441
93	0.508803	0.704232	0.662448
94	0.502741	0.734609	0.680285
95	0.502569	0.738477	0.697197
96	0.497528	0.752082	0.687429
97	0.491413	0.713754	0.712631
98	0.493478	0.735377	0.699069
99	0.511592	0.743167	0.70656
100	0.51464	0.722602	0.692885
101	0.5181	0.710254	0.692673
102	0.525746	0.701812	0.703998
103	0.524024	0.705718	0.698036
104	0.518234	0.7154	0.706411
105	0.539872	0.744955	0.694822
106	0.518404	0.730697	0.697682
107	0.513006	0.725245	0.694402
108	0.520889	0.694038	0.707387
109	0.531883	0.70504	0.728137
110	0.522892	0.753081	0.74126
111	0.526923	0.757241	0.710723
112	0.524347	0.760059	0.733041
113	0.541896	0.724505	0.741159
114	0.52335	0.704915	0.748517
115	0.536705	0.701183	0.733726
116	0.525071	0.681922	0.74256
117	0.521019	0.732384	0.73506
118	0.510241	0.714221	0.736387
119	0.506031	0.685794	0.744207
120	0.508358	0.685765	0.746744
121	0.498016	0.694871	0.75164
122	0.49344	0.668905	0.733964
123	0.496745	0.703128	0.729393
124	0.487314	0.695936	0.708335
125	0.481146	0.704604	0.720783
126	0.477425	0.693929	0.728316
127	0.491259	0.704759	0.746118
128	0.487598	0.685966	0.74977
129	0.499883	0.676096	0.748752
130	0.489063	0.716486	0.736018
131	0.495001	0.71208	0.720889
132	0.50036	0.683267	0.708117
133	0.485482	0.681276	0.718576
134	0.502533	0.672896	0.732616
135	0.497318	0.677419	0.756128
136	0.508263	0.682514	0.753211
137	0.508281	0.691083	0.736872
138	0.501508	0.707547	0.730918
139	0.492371	0.710608	0.728211
140	0.50098	0.670494	0.733432
141	0.492202	0.658291	0.73705
142	0.495949	0.6603	0.738833
143	0.502526	0.686479	0.731095
144	0.495954	0.632798	0.739927
145	0.483804	0.642332	0.726764
146	0.481841	0.633653	0.712503
147	0.483817	0.673257	0.694009
148	0.4876	0.671141	0.699191
149	0.485517	0.625796	0.713423
150	0.482936	0.632462	0.713411
151	0.483973	0.671929	0.722574
152	0.503504	0.652452	0.713534
153	0.51203	0.651286	0.712985
154	0.522709	0.65928	0.706746
155	0.525164	0.63717	0.690056
156	0.514266	0.652123	0.716542
157	0.520608	0.658141	0.716925
158	0.515823	0.657524	0.716197
159	0.520928	0.689737	0.717689
160	0.531188	0.683618	0.706235
161	0.527558	0.649352	0.686365
162	0.528113	0.628593	0.676182
163	0.529342	0.656548	0.679428
164	0.535978	0.672318	0.688619
165	0.536142	0.665421	0.698594
166	0.537238	0.657507	0.710199
167	0.535186	0.686665	0.701743
168	0.514995	0.655294	0.705354
169	0.512416	0.684303	0.710757
170	0.506069	0.673956	0.693265
171	0.50999	0.734796	0.702743
172	0.505614	0.71848	0.713808
173	0.497188	0.712981	0.699466
174	0.507703	0.715796	0.704813
175	0.50766	0.704544	0.705629
176	0.49387	0.706652	0.708714
177	0.481191	0.703724	0.701987
178	0.480946	0.670588	0.719801
179	0.492008	0.668169	0.695129
180	0.481012	0.673343	0.765488
Average	0.549743	0.739141	0.719085
Track count in average	46	47	48
Panel F
time (min)	WT + Wnt3a beads (repeated from C)	Lrp5/6dKO (#1)	Lrp5/6dKO (#2)		Averages for statistical analysis	WT + Wnt3a beads (repeated from C)			Lrp5/6dKO (#1)			Lrp5/6dKO (#2)					Two-way ANOVA	Ordinary						Number of families	3
1	0.905831	1.04264	1.03103		Track #	Average 1-30	Average 31-120 min	Average 121-180 min	Average 1-30	Average 31-120 min	Average 121-180 min	Average 1-30	Average 31-120 min	Average 121-180 min			Alpha	0.05						Number of comparisons per family	2
2	0.837205	1.00728	1.01282		1	1.20441	0.739156	0.705452	0.960754	0.440298	0.650965													Alpha	0.05
3	0.805732	1.00805	0.911805		2				0.876847	0.923865	0.621939	0.642612	0.463171	0.257257			Source of Variation	% of total variation	P value	P value summary	Significant?
4	0.773411	0.96234	0.880013		3	0.868412	0.353938	0.342944	1.04051	0.809277	0.881205	0.519329	0.348874	0.385158			Interaction	1.45	0.1051	ns	No			Dunnett's multiple comparisons test	Predicted (LS) mean diff.	95.00% CI of diff.	Below threshold?	Summary	Adjusted P Value		Test details	Predicted (LS) mean 1	Predicted (LS) mean 2	Predicted (LS) mean diff.	SE of diff.	N1	N2	q	DF
5	0.773857	0.925256	0.825736		4	0.815645	0.425246	0.202726	1.03939	0.839926	0.515766	0.728549	0.565104	0.684509			Row Factor	11.93	<0.0001	****	Yes
6	0.770461	0.884499	0.787467		5	0.93898	0.683067	0.442621	0.755647	0.822475	0.817	0.62483	0.602504	0.581411			Column Factor	9.628	<0.0001	****	Yes			0-30 min
7	0.757193	0.870022	0.74454		6	0.70502	0.554622	0.525346	0.951526	0.587023	0.78055	0.543225	0.525564	0.716859										WT Wnt3a vs. Lrp56dKO #1	-0.1117	-0.1862 to -0.03728	Yes	**	0.0019		WT Wnt3a vs. Lrp56dKO #1	0.7013	0.8131	-0.1117	0.03355	46	49	3.331	408
8	0.738409	0.836327	0.699675		7	0.697953	0.564574	0.517795	1.13386	0.825798	0.624931	0.663704	0.63436	0.538727			ANOVA table	SS (Type III)	DF	MS	F (DFn, DFd)	P value		WT Wnt3a vs. Lrp56dKO #2	0.0161	-0.06038 to 0.09259	No	ns	0.8538		WT Wnt3a vs. Lrp56dKO #2	0.7013	0.6852	0.0161	0.03446	46	44	0.4673	408
9	0.722453	0.810858	0.691207		8	0.724425	0.256392	0.458611	0.836827	0.928557	0.676355	0.464305	0.536081	0.65439			Interaction	0.2058	4	0.05146	F (4, 408) = 1.927	P=0.1051
10	0.719269	0.785107	0.664547		9	0.848954	0.696803	0.524152	0.757683	0.665741	1.07927	0.681853	0.479247	0.464326			Row Factor	1.693	2	0.8467	F (2, 408) = 31.71	P<0.0001		31-120 min
11	0.70246	0.816032	0.635632		10	0.599341	0.431608	0.682569	1.11093	0.823828	0.719685	0.46516	0.484804	0.535882			Column Factor	1.367	2	0.6833	F (2, 408) = 25.59	P<0.0001		WT Wnt3a vs. Lrp56dKO #1	-0.151	-0.2254 to -0.07649	Yes	****	<0.0001		WT Wnt3a vs. Lrp56dKO #1	0.5306	0.6816	-0.151	0.03355	46	49	4.5	408
12	0.695907	0.816575	0.604963		11	0.811145	0.839852	0.802988	0.836918	0.598098	0.689234	0.646174	0.606473	0.661875			Residual	10.9	408	0.0267				WT Wnt3a vs. Lrp56dKO #2	-0.08076	-0.1572 to -0.004275	Yes	*	0.0366		WT Wnt3a vs. Lrp56dKO #2	0.5306	0.6114	-0.08076	0.03446	46	44	2.344	408
13	0.700916	0.7917	0.614774		12				0.749982	0.556358	0.693341	0.548071	0.63556	0.547046
14	0.679227	0.845967	0.623453		13	0.694998	0.70686	0.794401	0.53863	0.684142	0.501529	0.869791	0.650628	0.604984			Data summary							121-180 min
15	0.68294	0.802994	0.635087		14	0.645551	0.633122	0.711899	0.656244	0.617186	0.486511	0.665389	0.628027	0.616354			Number of columns (Column Factor)	3						WT Wnt3a vs. Lrp56dKO #1	-0.1508	-0.2252 to -0.07630	Yes	****	<0.0001		WT Wnt3a vs. Lrp56dKO #1	0.5027	0.6534	-0.1508	0.03355	46	49	4.494	408
16	0.682914	0.777668	0.641106		15	0.873793	0.561712	0.575475	0.937615	0.608491	0.428451	0.464063	0.447617	0.588371			Number of rows (Row Factor)	3						WT Wnt3a vs. Lrp56dKO #2	-0.1106	-0.1871 to -0.03408	Yes	**	0.0028		WT Wnt3a vs. Lrp56dKO #2	0.5027	0.6132	-0.1106	0.03446	46	44	3.209	408
17	0.666828	0.788475	0.620936		16	0.55879	0.371257	0.421979				0.451418	0.524182	0.745518			Number of values	417
18	0.664384	0.781276	0.616679		17	0.647892	0.521558	0.689966	0.530161	0.676727	0.978945	1.3118	0.733026	0.588238
19	0.644015	0.750684	0.624255		18	0.647811	0.595596	0.791513	1.00935	0.805348	0.708089	0.677512	0.678311	0.567326
20	0.65579	0.74019	0.6119		19	0.76295	0.463401	0.824599	0.827769	0.35129	0.629051	0.589198	0.576352	0.582524
21	0.692938	0.734173	0.604631		20	0.738059	0.879351	0.535335	0.835626	0.84298	0.572884	0.611932	0.456088	0.631242
22	0.69904	0.735811	0.592841		21	0.640901	0.673682	0.672468	0.777115	0.697829	0.720362	0.731786	0.60512	0.698336
23	0.676565	0.720605	0.595833		22	0.760729	0.491721	0.699794	0.335216	1.06462	0.741395	0.891569	0.868595	0.738821
24	0.661958	0.719863	0.593707		23	0.85892	0.863025	0.776317	1.02166	0.538583	0.507135	0.610956	0.680426	0.574566
25	0.642856	0.722422	0.596339		24	0.539079	0.251308	0.164677	0.773774	0.562121	0.65779	0.794535	0.765411	0.771613
26	0.636004	0.739795	0.615316		25	0.880143	0.734191	0.533237	0.668831	0.405391	0.411316	0.545522	0.581339	0.8463
27	0.626927	0.724996	0.619022		26	0.769884	0.454087	0.409103	0.874013	0.761763	0.575707	0.677292	0.493545	0.388671
28	0.61081	0.746178	0.626336		27	0.807503	0.756686	0.612687	0.794771	0.422832	0.476446	0.605415	0.606393	0.533791
29	0.611371	0.749377	0.610745		28	0.612618	0.327383	0.122968	0.669312	0.525194	0.621029	0.728566	0.437046	0.355663
30	0.602601	0.755586	0.624784		29	0.736816	0.866379	0.628955	0.785551	0.512066	0.393112	0.549515	0.429919	0.537767
31	0.596584	0.78871	0.619266		30	0.791755	0.641355	0.234074	0.918221	0.586987	1.05532	0.842657	0.828794	0.78436
32	0.588828	0.738753	0.624254		31	0.593414	0.552263	0.492929	0.731691	0.388336	0.546531	0.672439	0.74644	0.594771
33	0.583059	0.752435	0.60185		32	0.546397	0.456392	0.372616	0.942434	0.621828	0.455235	0.667234	0.619438	0.468991
34	0.548755	0.767018	0.615615		33	0.766695	0.535482	0.263926	0.670114	0.852015	0.753128	0.712455	0.77399	0.886246
35	0.558615	0.765109	0.619169		34	0.440058	0.370421	0.547096	0.882889	0.75427	0.802617	0.669635	0.638622	0.751339
36	0.556669	0.743093	0.591763		35	0.731635	0.526589	0.721206	0.842493	0.865662	0.654189	0.729463	0.711858	0.637318
37	0.555232	0.726331	0.576537		36	0.608333	0.301622	0.29811	0.907787	0.854276	0.470998	0.720286	0.676061	0.675713
38	0.558002	0.713091	0.587849		37	0.479114	0.350635	0.468734	0.648516	0.405191	0.810255	0.75454	0.666282	0.570737
39	0.548465	0.738064	0.586722		38	0.887277	0.746761	0.753606	0.670298	0.665674	0.545841	0.809349	0.738591	0.699491
40	0.546384	0.725655	0.58482		39	0.633528	0.328783	0.146616	0.556486	0.404192	0.456063	0.6843	0.446575	0.569005
41	0.562657	0.717205	0.587238		40	0.709795	0.399079	0.206616	0.901777	0.767279	0.521512	0.844652	0.719781	0.904126
42	0.56207	0.688355	0.605589		41	0.614946	0.549867	0.416005	0.810382	0.677803	0.633255	0.64047	0.713382	0.807768
43	0.56008	0.68927	0.599965		42	0.412435	0.27744	0.260018	0.909013	0.988311	0.84766	0.775178	0.654823	0.581765
44	0.561336	0.661313	0.600494		43	0.551569	0.3672	0.25234	0.918251	0.630625	0.535602	0.674827	0.556647	0.535217
45	0.551337	0.671713	0.606419		44	0.658508	0.336528	0.301367	0.844419	0.949153	1.01975	0.813493	0.546331	0.348222
46	0.544451	0.659482	0.605334		45	0.418143	0.423736	0.583498	0.535472	0.782281	0.625417	0.835481	0.819925	0.769704
47	0.552295	0.667382	0.586236		46	0.47896	0.599667	0.652827	0.799467	0.749771	0.510442
48	0.545991	0.679092	0.602341		47	0.632195	0.299447	0.349536	0.885003	0.616856	0.378954
49	0.536431	0.681023	0.610502		48	0.916274	0.649208	0.63079	0.841652	0.640078	0.867601
50	0.541855	0.688104	0.597584		49				0.761094	0.512088	0.585054
51	0.548228	0.683494	0.592761		50				0.777543	0.787075	0.78275
52	0.545771	0.677265	0.587252
53	0.541208	0.668489	0.582969		Track count	46	46	46	49	49	49	44	44	44
54	0.549524	0.674709	0.594212		Average	0.701342	0.530632	0.502663	0.813092	0.681583	0.653432	0.685239	0.611393	0.613234
55	0.547631	0.673124	0.627562
56	0.519687	0.652142	0.613885
57	0.540683	0.642496	0.622257
58	0.538349	0.638859	0.62899
59	0.523687	0.66578	0.629245
60	0.519614	0.668478	0.636791
61	0.535225	0.689187	0.642851
62	0.556578	0.697653	0.651822
63	0.558918	0.694966	0.640978
64	0.54991	0.667529	0.638269
65	0.529424	0.670767	0.644305
66	0.534775	0.653367	0.647896
67	0.533071	0.664388	0.624371
68	0.519644	0.673749	0.628811
69	0.515238	0.670191	0.624116
70	0.513782	0.678183	0.630345
71	0.516283	0.691767	0.619707
72	0.535644	0.674668	0.618892
73	0.523669	0.688242	0.621358
74	0.529308	0.722589	0.60565
75	0.520489	0.690567	0.601623
76	0.513931	0.694466	0.599141
77	0.526678	0.702889	0.594983
78	0.530132	0.670428	0.601562
79	0.523614	0.67822	0.598979
80	0.517016	0.699373	0.601175
81	0.528478	0.673967	0.603406
82	0.513971	0.685622	0.608342
83	0.503003	0.69223	0.618563
84	0.498443	0.68754	0.606449
85	0.511617	0.697333	0.635632
86	0.519297	0.682917	0.645575
87	0.519258	0.67785	0.638105
88	0.51864	0.666289	0.633898
89	0.502633	0.669293	0.632225
90	0.500979	0.648321	0.617095
91	0.524113	0.635309	0.624177
92	0.519845	0.6381	0.62512
93	0.508803	0.637527	0.634418
94	0.502741	0.639737	0.634646
95	0.502569	0.655158	0.609633
96	0.497528	0.673153	0.614814
97	0.491413	0.651449	0.621168
98	0.493478	0.651928	0.623366
99	0.511592	0.675235	0.621039
100	0.51464	0.664682	0.605769
101	0.5181	0.654386	0.607376
102	0.525746	0.657289	0.604016
103	0.524024	0.671531	0.596834
104	0.518234	0.659389	0.593709
105	0.539872	0.658116	0.595531
106	0.518404	0.645573	0.607472
107	0.513006	0.663752	0.60389
108	0.520889	0.677654	0.608921
109	0.531883	0.657424	0.601137
110	0.522892	0.667308	0.595607
111	0.526923	0.660433	0.597934
112	0.524347	0.675816	0.598443
113	0.541896	0.67443	0.592339
114	0.52335	0.688908	0.602375
115	0.536705	0.706535	0.593011
116	0.525071	0.703199	0.592598
117	0.521019	0.690421	0.596652
118	0.510241	0.671573	0.612774
119	0.506031	0.671161	0.607062
120	0.508358	0.704698	0.601973
121	0.498016	0.713893	0.604147
122	0.49344	0.717642	0.609765
123	0.496745	0.676316	0.603187
124	0.487314	0.672801	0.599824
125	0.481146	0.694354	0.603154
126	0.477425	0.66351	0.591631
127	0.491259	0.649542	0.591788
128	0.487598	0.668429	0.609314
129	0.499883	0.668496	0.599605
130	0.489063	0.658509	0.59846
131	0.495001	0.677178	0.598639
132	0.50036	0.660843	0.604649
133	0.485482	0.644419	0.600862
134	0.502533	0.64406	0.603874
135	0.497318	0.662068	0.615039
136	0.508263	0.627036	0.609976
137	0.508281	0.63848	0.58627
138	0.501508	0.634394	0.60001
139	0.492371	0.627588	0.601743
140	0.50098	0.628702	0.602116
141	0.492202	0.660891	0.616042
142	0.495949	0.642615	0.613378
143	0.502526	0.625984	0.620428
144	0.495954	0.635601	0.607397
145	0.483804	0.628589	0.614698
146	0.481841	0.642959	0.601061
147	0.483817	0.63552	0.590697
148	0.4876	0.652405	0.603365
149	0.485517	0.647744	0.597705
150	0.482936	0.643812	0.618573
151	0.483973	0.646998	0.610828
152	0.503504	0.648158	0.603582
153	0.51203	0.653259	0.614756
154	0.522709	0.645716	0.605399
155	0.525164	0.6567	0.612906
156	0.514266	0.646986	0.617653
157	0.520608	0.64985	0.626736
158	0.515823	0.636802	0.627142
159	0.520928	0.649289	0.625671
160	0.531188	0.652401	0.631746
161	0.527558	0.636762	0.642579
162	0.528113	0.624419	0.647585
163	0.529342	0.658737	0.64759
164	0.535978	0.657955	0.63709
165	0.536142	0.664517	0.636614
166	0.537238	0.654264	0.627554
167	0.535186	0.643247	0.635027
168	0.514995	0.642751	0.624923
169	0.512416	0.65802	0.627294
170	0.506069	0.653038	0.625866
171	0.50999	0.648841	0.618779
172	0.505614	0.631193	0.609573
173	0.497188	0.626619	0.604336
174	0.507703	0.675023	0.610487
175	0.50766	0.673357	0.617476
176	0.49387	0.687574	0.622039
177	0.481191	0.664815	0.627812
178	0.480946	0.654405	0.615675
179	0.492008	0.663835	0.612045
180	0.481012	0.656017	0.609882
Average	0.549743	0.694118	0.624315
Track count in average	46	49	44
Panel G
time (min)	WT + Wnt3a beads (repeated from C)	BKO			Averages for statistical analysis	WT + Wnt3a beads (repeated from C)			BKO					Two-way ANOVA	Ordinary						Number of families	1
1	0.905831	0.998043			Track #	Average 1-30	Average 31-120 min	Average 121-180 min	Average 1-30	Average 31-120 min	Average 121-180 min			Alpha	0.05						Number of comparisons per family	3
2	0.837205	0.961158			1	1.20441	0.739156	0.705452	0.725106	0.678327	0.482113										Alpha	0.05
3	0.805732	0.916268			2				1.01758	1.10298	1.06396			Source of Variation	% of total variation	P value	P value summary	Significant?
4	0.773411	0.887663			3	0.868412	0.353938	0.342944	0.770136	0.779364	0.73967			Interaction	1.812	0.04	*	Yes			Šídák's multiple comparisons test	Predicted (LS) mean diff.	95.00% CI of diff.	Below threshold?	Summary	Adjusted P Value		Test details	Predicted (LS) mean 1	Predicted (LS) mean 2	Predicted (LS) mean diff.	SE of diff.	N1	N2	t	DF
5	0.773857	0.883426			4	0.815645	0.425246	0.202726	0.301362	0.507564	0.592112			Row Factor	7.401	<0.0001	****	Yes
6	0.770461	0.865082			5	0.93898	0.683067	0.442621	0.577723	0.475874	0.495891			Column Factor	14.12	<0.0001	****	Yes			WT Wnt3a - BKO							WT Wnt3a - BKO
7	0.757193	0.833934			6	0.70502	0.554622	0.525346	0.609037	0.541024	0.670277										0-30 min	-0.08561	-0.1814 to 0.01020	No	ns	0.0949		0-30 min	0.7013	0.787	-0.08561	0.03988	46	48	2.147	276
8	0.738409	0.828949			7	0.697953	0.564574	0.517795	0.898307	0.959163	1.03609			ANOVA table	SS (Type III)	DF	MS	F (DFn, DFd)	P value		31-120 min	-0.1794	-0.2752 to -0.08355	Yes	****	<0.0001		31-120 min	0.5306	0.71	-0.1794	0.03988	46	48	4.497	276
9	0.722453	0.82595			8	0.724425	0.256392	0.458611	0.523345	0.289876	0.235782			Interaction	0.2433	2	0.1216	F (2, 276) = 3.256	P=0.0400		121-180 min	-0.2271	-0.3229 to -0.1312	Yes	****	<0.0001		121-180 min	0.5027	0.7297	-0.2271	0.03988	46	48	5.693	276
10	0.719269	0.815184			9	0.848954	0.696803	0.524152	0.972229	0.888963	0.75407			Row Factor	0.9936	2	0.4968	F (2, 276) = 13.30	P<0.0001
11	0.70246	0.789328			10	0.599341	0.431608	0.682569	0.862835	0.900436	0.969396			Column Factor	1.896	1	1.896	F (1, 276) = 50.73	P<0.0001
12	0.695907	0.787635			11	0.811145	0.839852	0.802988	0.797803	0.78915	0.850701			Residual	10.31	276	0.03736
13	0.700916	0.787656			12				0.563848	0.675364	0.931337
14	0.679227	0.765626			13	0.694998	0.70686	0.794401	0.71363	0.354387	0.476157			Difference between column means
15	0.68294	0.748259			14	0.645551	0.633122	0.711899	0.893571	0.739868	0.601439			Predicted (LS) mean of WT Wnt3a	0.5782
16	0.682914	0.747597			15	0.873793	0.561712	0.575475	0.742718	0.67128	0.588805			Predicted (LS) mean of BKO	0.7422
17	0.666828	0.727599			16	0.55879	0.371257	0.421979	0.987812	0.766043	0.935839			Difference between predicted means	-0.164
18	0.664384	0.738206			17	0.647892	0.521558	0.689966	0.701994	0.551639	0.524756			SE of difference	0.02303
19	0.644015	0.726759			18	0.647811	0.595596	0.791513	1.20556	1.03629	0.978088			95% CI of difference	-0.2093 to -0.1187
20	0.65579	0.73515			19	0.76295	0.463401	0.824599	0.900005	0.991968	0.874999
21	0.692938	0.723834			20	0.738059	0.879351	0.535335	0.546128	0.380668	0.636399			Data summary
22	0.69904	0.725717			21	0.640901	0.673682	0.672468	0.678746	0.964231	1.15491			Number of columns (Column Factor)	2
23	0.676565	0.704951			22	0.760729	0.491721	0.699794	0.960372	0.951175	0.581161			Number of rows (Row Factor)	3
24	0.661958	0.703337			23	0.85892	0.863025	0.776317	0.771703	0.851709	0.947111			Number of values	282
25	0.642856	0.722523			24	0.539079	0.251308	0.164677	1.09853	0.796301	0.722014
26	0.636004	0.718279			25	0.880143	0.734191	0.533237	0.824241	0.387586	0.665628
27	0.626927	0.72939			26	0.769884	0.454087	0.409103	0.888263	1.04274	0.978031
28	0.61081	0.730464			27	0.807503	0.756686	0.612687	0.787387	0.758032	0.467667
29	0.611371	0.740969			28	0.612618	0.327383	0.122968	0.618016	0.600809	0.845547
30	0.602601	0.739718			29	0.736816	0.866379	0.628955	0.770606	0.753281	0.732571
31	0.596584	0.72908			30	0.791755	0.641355	0.234074	0.643513	0.535937	0.585315
32	0.588828	0.714656			31	0.593414	0.552263	0.492929	0.808297	0.573236	0.871482
33	0.583059	0.706692			32	0.546397	0.456392	0.372616	0.945646	0.983506	0.819156
34	0.548755	0.714323			33	0.766695	0.535482	0.263926	0.767297	0.696832	0.725796
35	0.558615	0.702567			34	0.440058	0.370421	0.547096	0.741934	0.696941	0.627599
36	0.556669	0.705963			35	0.731635	0.526589	0.721206	0.750524	0.542963	0.617445
37	0.555232	0.703278			36	0.608333	0.301622	0.29811	0.53401	0.488343	0.8213
38	0.558002	0.693708			37	0.479114	0.350635	0.468734	0.820337	0.913594	0.93323
39	0.548465	0.69016			38	0.887277	0.746761	0.753606	0.626109	0.576875	0.417257
40	0.546384	0.700698			39	0.633528	0.328783	0.146616	0.8323	0.864364	0.848664
41	0.562657	0.695176			40	0.709795	0.399079	0.206616	0.535615	0.397306	0.384355
42	0.56207	0.7025			41	0.614946	0.549867	0.416005	1.0018	0.74959	0.692386
43	0.56008	0.692425			42	0.412435	0.27744	0.260018	0.431356	0.325477	0.838906
44	0.561336	0.695412			43	0.551569	0.3672	0.25234	0.744686	0.729849	0.747238
45	0.551337	0.689904			44	0.658508	0.336528	0.301367	0.897241	0.75914	0.702318
46	0.544451	0.685908			45	0.418143	0.423736	0.583498	1.10618	1.02041	1.02331
47	0.552295	0.699087			46	0.47896	0.599667	0.652827	0.826808	0.885367	1.0645
48	0.545991	0.697497			47	0.632195	0.299447	0.349536	0.993073	0.577404	0.447413
49	0.536431	0.700986			48	0.916274	0.649208	0.63079
50	0.541855	0.707354			49				1.05853	0.576263	0.326365
51	0.548228	0.715666			50
52	0.545771	0.717381
53	0.541208	0.715779			Track count	46	46	46	48	48	48
54	0.549524	0.7242			Average	0.701342	0.530632	0.502663	0.786955	0.709989	0.72972
55	0.547631	0.710645
56	0.519687	0.730858
57	0.540683	0.744234
58	0.538349	0.746422
59	0.523687	0.730354
60	0.519614	0.721153
61	0.535225	0.721072
62	0.556578	0.719936
63	0.558918	0.733454
64	0.54991	0.732194
65	0.529424	0.717258
66	0.534775	0.696216
67	0.533071	0.711123
68	0.519644	0.716183
69	0.515238	0.728402
70	0.513782	0.741924
71	0.516283	0.724758
72	0.535644	0.737457
73	0.523669	0.728118
74	0.529308	0.687297
75	0.520489	0.7171
76	0.513931	0.725641
77	0.526678	0.717986
78	0.530132	0.727836
79	0.523614	0.718282
80	0.517016	0.716542
81	0.528478	0.709825
82	0.513971	0.692991
83	0.503003	0.662477
84	0.498443	0.674676
85	0.511617	0.698996
86	0.519297	0.686121
87	0.519258	0.675143
88	0.51864	0.666569
89	0.502633	0.682436
90	0.500979	0.68881
91	0.524113	0.690685
92	0.519845	0.691794
93	0.508803	0.6851
94	0.502741	0.696979
95	0.502569	0.710853
96	0.497528	0.714147
97	0.491413	0.720167
98	0.493478	0.694659
99	0.511592	0.682481
100	0.51464	0.681001
101	0.5181	0.682838
102	0.525746	0.687237
103	0.524024	0.697262
104	0.518234	0.701825
105	0.539872	0.706726
106	0.518404	0.726349
107	0.513006	0.730248
108	0.520889	0.724715
109	0.531883	0.722598
110	0.522892	0.707589
111	0.526923	0.714686
112	0.524347	0.714059
113	0.541896	0.72072
114	0.52335	0.726587
115	0.536705	0.747421
116	0.525071	0.745034
117	0.521019	0.741694
118	0.510241	0.72817
119	0.506031	0.733558
120	0.508358	0.730956
121	0.498016	0.716965
122	0.49344	0.729143
123	0.496745	0.753706
124	0.487314	0.742495
125	0.481146	0.73384
126	0.477425	0.740504
127	0.491259	0.725397
128	0.487598	0.724992
129	0.499883	0.723361
130	0.489063	0.74201
131	0.495001	0.72862
132	0.50036	0.742586
133	0.485482	0.72852
134	0.502533	0.717669
135	0.497318	0.720622
136	0.508263	0.723727
137	0.508281	0.711078
138	0.501508	0.718701
139	0.492371	0.724294
140	0.50098	0.742272
141	0.492202	0.748451
142	0.495949	0.734972
143	0.502526	0.726656
144	0.495954	0.7507
145	0.483804	0.758941
146	0.481841	0.761972
147	0.483817	0.756949
148	0.4876	0.765027
149	0.485517	0.753727
150	0.482936	0.749047
151	0.483973	0.750932
152	0.503504	0.741747
153	0.51203	0.727031
154	0.522709	0.736029
155	0.525164	0.725086
156	0.514266	0.731861
157	0.520608	0.726228
158	0.515823	0.717306
159	0.520928	0.718387
160	0.531188	0.708715
161	0.527558	0.69604
162	0.528113	0.696466
163	0.529342	0.703697
164	0.535978	0.704957
165	0.536142	0.705306
166	0.537238	0.719369
167	0.535186	0.71941
168	0.514995	0.703685
169	0.512416	0.705616
170	0.506069	0.707879
171	0.50999	0.737789
172	0.505614	0.741249
173	0.497188	0.729347
174	0.507703	0.723815
175	0.50766	0.73282
176	0.49387	0.720735
177	0.481191	0.729865
178	0.480946	0.722629
179	0.492008	0.713292
180	0.481012	0.732275
Average	0.549743	0.729079
Track count in average	46	48
Panel I
Wnt3a bead movement	WT Wnt3a	WT iWnt3a	Lrp5KO (#1)	Lrp5KO (#2)	Lrp6KO (#1)	Lrp6KO (#2)	Lrp56dKO (#1)	Lrp56dKO (#2)	BKO				ANOVA summary							Number of families	1
	3.78212	2.59777	2.55249	4.27222	6.3352	5.05556	4.21547		6.86034				F	5.783						Number of comparisons per family	8
	38.5418994*	3.51397	3.64641	2.76111	4.41341	3.71667	3.0884	2.80556	5.22222				P value	<0.0001						Alpha	0.05
	3.59777	2.7095	17.0608	1.97778	5.45251	1.86111	5.27072	2.61111	1.86111				P value summary	****
	3.37989	11.1508	56.1325967*	8.34444	2.82682	3.80556	5.1105	2.50556	3.27222				Significant diff. among means (P < 0.05)?	Yes						Dunnett's multiple comparisons test	Mean Diff.	95.00% CI of diff.	Below threshold?	Summary	Adjusted P Value	A-?				Test details	Mean 1	Mean 2	Mean Diff.	SE of diff.	n1	n2	q	DF
	2.84916	3.12291	2.44751	2.5	2.7095	2.01111	3.14917	2.83333	6.36667				R squared	0.1012						WT Wnt3a vs. WT iWnt3a	-1.7	-2.872 to -0.5276	Yes	***	0.001	B	WT iWnt3a			WT Wnt3a vs. WT iWnt3a	3.334	5.034	-1.7	0.4396	48	50	3.867	411
	4.32961	2.40223	2.63536	7.02222	2.40223	4.68889	4.0663	5.45	7.12778											WT Wnt3a vs. Lrp5KO (#1)	-1.631	-2.809 to -0.4528	Yes	**	0.0019	C	Lrp5KO (#1)			WT Wnt3a vs. Lrp5KO (#1)	3.334	4.965	-1.631	0.4418	48	49	3.692	411
	5.13966	3.24581	7.12707	6.57222	8.70391	3.32778	3.58011	3.54444	7.18889				Brown-Forsythe test							WT Wnt3a vs. Lrp5KO (#2)	-0.7538	-2.014 to 0.5059	No	ns	0.4749	D	Lrp5KO (#2)			WT Wnt3a vs. Lrp5KO (#2)	3.334	4.088	-0.7538	0.4724	48	38	1.596	411
	3.35754	3.77095	8.14365	5.10556	5.41341	63.0166667*	4.23757	3.08889	2.68333				F (DFn, DFd)	3.532 (8, 411)						WT Wnt3a vs. Lrp6KO (#1)	-1.621	-2.799 to -0.4431	Yes	**	0.002	E	Lrp6KO (#1)			WT Wnt3a vs. Lrp6KO (#1)	3.334	4.955	-1.621	0.4418	48	49	3.67	411
	3.26816	4.53631	9.26519	3.45	3.60335	4.37222	2.9779	2.53889	3.45556				P value	0.0006						WT Wnt3a vs. Lrp6KO (#2)	-0.637	-1.841 to 0.5669	No	ns	0.6115	F	Lrp6KO (#2)			WT Wnt3a vs. Lrp6KO (#2)	3.334	3.971	-0.637	0.4514	48	45	1.411	411
	2.36872	5.48045	4.91713	5.08889	7.57542	54.9555556*	4.65746	2.05	6.18333				P value summary	***						WT Wnt3a vs. Lrp56dKO (#1)	-1.19	-2.368 to -0.01183	Yes	*	0.0465	G	Lrp56dKO (#1)			WT Wnt3a vs. Lrp56dKO (#1)	3.334	4.524	-1.19	0.4418	48	49	2.694	411
	4.58659	14.486	7.69613	3.58889	4.39665	5.43889	2.8674	3.34444	0.988889				Are SDs significantly different (P < 0.05)?	Yes						WT Wnt3a vs. Lrp56dKO (#2)	0.4959	-0.7223 to 1.714	No	ns	0.842	H	Lrp56dKO (#2)			WT Wnt3a vs. Lrp56dKO (#2)	3.334	2.838	0.4959	0.4568	48	43	1.086	411
	8.52514	4.24022	5.17127	3.5	3.02793	68.6666667*	3.22652	1.83333	3.75556											WT Wnt3a vs. BKO	-0.586	-1.764 to 0.5922	No	ns	0.6755	I	BKO			WT Wnt3a vs. BKO	3.334	3.92	-0.586	0.4418	48	49	1.326	411
	4.84916	3.64246	6.16575	2.85	3.86592	2.49444	5.24862	2.51111	36.6*				Bartlett's test
	7.32961	3.21229	3.28729	3.77778	14.2793	2.94444	3.1768	2.48889	3.10497				Bartlett's statistic (corrected)	85.65
	3.09497	4.68715	2.33149	3.32222	7.20112	5.7	3.54696	2.51667	4.02222				P value	<0.0001
	3.32961	4.48045	2.82873	3.20556	5.59777	3.10556	5.13812	2.17778	3.56111				P value summary	****
	2.59218	4.86592	4.50829	2.47778	1.97765	2.35556	4.14917	1.85	2.27222				Are SDs significantly different (P < 0.05)?	Yes
	2.76536	3.01117	3.80663	2.11667	7.72626	1.82222	4.07182	1.60556	6.9
	3.06145	3.00559	1.40331	2.73333	4.77654	3.24444	2.53591	3.97222	3.15556				ANOVA table	SS	DF	MS	F (DFn, DFd)	P value
	4.46927	2.4581	4.68508	2.51667	3.06145	1.71111	4.83425	3.87222	2.86667				Treatment (between columns)	218.9	8	27.37	F (8, 411) = 5.783	P<0.0001
	1.77654	5.15642	5.0221	6.31111	2.78212	5.37778	2.51381	2.26111	4.33889				Residual (within columns)	1945	411	4.733
	4.83799	4.67598	10.5193	2.59444	2.68156	5.58333	3.88398	4.17222	3.56667				Total	2164	419
	3.94972	5.01117	4.03867	2.52222	4.29609	4.00556	3.25967	3.27778	1.9
	3.4581	10.4637	10.3094	2.55556	2.21229	6.51111	3.11602	2.28333	2.61667				Data summary
	2.84916	11.3464	6.49171	2.9	3.39665	2.98889	2.80663	5.17222	1.68889				Number of treatments (columns)	9
	2.46369	2.75419	2.36464	4.36111	2.48045	9.68889	2.43094	2.75556	3.37222				Number of values (total)	420
	2.03352	10.8603	3.1547	2.01667	9.51955	9.18333	3.28177	3.32778	7.42222
	2.12849	3.88827	3.61326	4.38889	1.94972	3.54444	3.16022	2.93333	5.78889
	4.6648	4.06704	7.16575	3.93889	2.87709	4.41667	5.76796	1.85	2.76667
	2.51955	9.54749	4.64641	3.28889	3.09497	2.83889	2.8011	2.63333	2.26667
	3.18994	4.39106	8.39227	4.39444	14.4693	4.25	4.92265	37.1555556*	4.26667
	2	8.3743	3.58564	3.81111	3.6257	2.60556	4.44199	1.67778	2.65
	2.80447	3.40223	2.67403	5.00556	2.45251	3.13333	26.3149171*	3.68333	2.51111
	2.75419	5.07821	5.74586	5.04444	6.22905	2.26111	12.1436	2.02222	2.20556
	2.94972	4.24022	6.36464	10.4333	8.58659	6.42778	7.1768	2.02778	5.46111
	3.2905	3.49721	4.25414	5.92222	4.8324	6.97778	7.16575	2.23333	2.16667
	2.92179	7.41899	5.00552	3.33333	8.91061	6.66111	6.13812	3.57778	5.13889
	1.74302	2.55866	1.65193	5.33333	3.81006	3.66667	4.72376	3.45556	5.7
	2.30168	4.90503	8.1326		2.14525	3.88889	2.26519	1.71667	3.30556
	2.53073	2.92737	2.79006		2.77095	4.01667	6.43646	2.20556	3.06111
	1.35754	3.95531	3.63536		3.4581	3.88889	4.45856	4.70556	5.21667
	1.64804	4.08939	2.12707		6.71508	3.11667	4.27624	2.66667	4.13889
	3.23464	3.97207	3.33702		2.82682	2.18333	6.66851	3.79444	2.21111
	3.75419	3.46369	3.83425		6.0838	2.43889	4.75138	1.58889	2.11667
	4.15084	3.60335	4.73481		2.88827	2.06667	3.64641	2.41667	1.71667
	2.13408	5.6257	2.98343		4.00559	1.95	9.56354		6.08333
	5.11732	3.89385	6.16575		22.5865922*	2.9	7.06077		3.38889
	1.78771	3.72067	3.44199		3.50279	4.46667	4.66298		3.41111
	3.00559	12	5.1105		7.24581		5.72376		9.60556
		2.18994	2.31492		7.61453		3.28177		1.15
Count	48	50	49	38	49	45	49	43	49
Average	3.33403	5.03397	4.96505	4.08787	4.95531	3.97099	4.52407	2.83811	3.92004	Min	2.83811	Max	5.03397
Median	3.07821	4.01955	4.25414	3.54444	3.86592	3.66667	4.21547	2.61111	3.38889	Min	2.61111	Max	4.25414
blue values are excluded outliers
Panel J
	Percentage		Cell counts				P value and statistical significance					P value and statistical significance					P value and statistical significance					P value and statistical significance					P value and statistical significance					P value and statistical significance					P value and statistical significance					P value and statistical significance
Cell line	Retains	Drops	Retains	Drops	Total		Test	Fisher's exact test				Test	Fisher's exact test				Test	Fisher's exact test				Test	Fisher's exact test				Test	Fisher's exact test				Test	Fisher's exact test				Test	Fisher's exact test				Test	Fisher's exact test
WT (Wnt3a)	95.9184	4.08163	47	2	49		P value	<0.0001				P value	>0.9999				P value	0.4967				P value	0.0879				P value	0.0245				P value	0.1467				P value	>0.9999				P value	0.0848
WT (iWnt3a)	55.5556	44.4444	30	24	54		P value summary	****				P value summary	ns				P value summary	ns				P value summary	ns				P value summary	*				P value summary	ns				P value summary	ns				P value summary	ns
Lrp5KO (#1)	97.7778	2.22222	44	1	45		One- or two-sided	Two-sided				One- or two-sided	Two-sided				One- or two-sided	Two-sided				One- or two-sided	Two-sided				One- or two-sided	Two-sided				One- or two-sided	Two-sided				One- or two-sided	Two-sided				One- or two-sided	Two-sided
Lrp5KO (#2)	100	0	43	0	43		Statistically significant (P < 0.05)?	Yes				Statistically significant (P < 0.05)?	No				Statistically significant (P < 0.05)?	No				Statistically significant (P < 0.05)?	No				Statistically significant (P < 0.05)?	Yes				Statistically significant (P < 0.05)?	No				Statistically significant (P < 0.05)?	No				Statistically significant (P < 0.05)?	No
Lrp6KO (#1)	85.1064	14.8936	40	7	47
Lrp6KO (#2)	80.4348	19.5652	37	9	46		Data analyzed	Retains	Drops	Total		Data analyzed	Retains	Drops	Total		Data analyzed	Retains	Drops	Total		Data analyzed	Retains	Drops	Total		Data analyzed	Retains	Drops	Total		Data analyzed	Retains	Drops	Total		Data analyzed	Retains	Drops	Total		Data analyzed	Retains	Drops	Total
Lrp5/6dKO (#1)	86.6667	13.3333	39	6	45		WT (Wnt3a)	47	2	49		WT (Wnt3a)	47	2	49		WT (Wnt3a)	47	2	49		WT (Wnt3a)	47	2	49		WT (Wnt3a)	47	2	49		WT (Wnt3a)	47	2	49		WT (Wnt3a)	47	2	49		WT (Wnt3a)	47	2	49
Lrp5/6dKO (#2)	96	4	48	2	50		WT (iWnt3a)	30	24	54		Lrp5KO (#1)	44	1	45		Lrp5KO (#2)	43	0	43		Lrp6KO (#1)	40	7	47		Lrp6KO (#2)	37	9	46		Lrp5/5dKO (#1)	39	6	45		Lrp5/6dKO (#2)	48	2	50		BKO	39	7	46
BKO	84.7826	15.2174	39	7	46		Total	77	26	103		Total	91	3	94		Total	90	2	92		Total	87	9	96		Total	84	11	95		Total	86	8	94		Total	95	4	99		Total	86	9	95
							Percentage of row total	Retains	Drops			Percentage of row total	Retains	Drops			Percentage of row total	Retains	Drops			Percentage of row total	Retains	Drops			Percentage of row total	Retains	Drops			Percentage of row total	Retains	Drops			Percentage of row total	Retains	Drops			Percentage of row total	Retains	Drops
							WT (Wnt3a)	95.92%	4.08%			WT (Wnt3a)	95.92%	4.08%			WT (Wnt3a)	95.92%	4.08%			WT (Wnt3a)	95.92%	4.08%			WT (Wnt3a)	95.92%	4.08%			WT (Wnt3a)	95.92%	4.08%			WT (Wnt3a)	95.92%	4.08%			WT (Wnt3a)	95.92%	4.08%
							WT (iWnt3a)	55.56%	44.44%			Lrp5KO (#1)	97.78%	2.22%			Lrp5KO (#2)	100.00%	0.00%			Lrp6KO (#1)	85.11%	14.89%			Lrp6KO (#2)	80.43%	19.57%			Lrp5/5dKO (#1)	86.67%	13.33%			Lrp5/6dKO (#2)	96.00%	4.00%			BKO	84.78%	15.22%
							Percentage of column total	Retains	Drops			Percentage of column total	Retains	Drops			Percentage of column total	Retains	Drops			Percentage of column total	Retains	Drops			Percentage of column total	Retains	Drops			Percentage of column total	Retains	Drops			Percentage of column total	Retains	Drops			Percentage of column total	Retains	Drops
							WT (Wnt3a)	61.04%	7.69%			WT (Wnt3a)	51.65%	66.67%			WT (Wnt3a)	52.22%	100.00%			WT (Wnt3a)	54.02%	22.22%			WT (Wnt3a)	55.95%	18.18%			WT (Wnt3a)	54.65%	25.00%			WT (Wnt3a)	49.47%	50.00%			WT (Wnt3a)	54.65%	22.22%
							WT (iWnt3a)	38.96%	92.31%			Lrp5KO (#1)	48.35%	33.33%			Lrp5KO (#2)	47.78%	0.00%			Lrp6KO (#1)	45.98%	77.78%			Lrp6KO (#2)	44.05%	81.82%			Lrp5/5dKO (#1)	45.35%	75.00%			Lrp5/6dKO (#2)	50.53%	50.00%			BKO	45.35%	77.78%
							Percentage of grand total	Retains	Drops			Percentage of grand total	Retains	Drops			Percentage of grand total	Retains	Drops			Percentage of grand total	Retains	Drops			Percentage of grand total	Retains	Drops			Percentage of grand total	Retains	Drops			Percentage of grand total	Retains	Drops			Percentage of grand total	Retains	Drops
							WT (Wnt3a)	45.63%	1.94%			WT (Wnt3a)	50.00%	2.13%			WT (Wnt3a)	51.09%	2.17%			WT (Wnt3a)	48.96%	2.08%			WT (Wnt3a)	49.47%	2.11%			WT (Wnt3a)	50.00%	2.13%			WT (Wnt3a)	47.47%	2.02%			WT (Wnt3a)	49.47%	2.11%
							WT (iWnt3a)	29.13%	23.30%			Lrp5KO (#1)	46.81%	1.06%			Lrp5KO (#2)	46.74%	0.00%			Lrp6KO (#1)	41.67%	7.29%			Lrp6KO (#2)	38.95%	9.47%			Lrp5/5dKO (#1)	41.49%	6.38%			Lrp5/6dKO (#2)	48.48%	2.02%			BKO	41.05%	7.37%
