# Supplementary material for: Wnt- and glutamate-receptors orchestrate stem cell dynamics and asymmetric cell division
Source: eLife. 2021 May 24;10:e59791. doi: 10.7554/eLife.59791 (PMC8177892; doi:10.7554/eLife.59791)
Supplement: Figure 7—figure supplement 1—source data 1. [file elife-59791-fig7-figsupp1-data1.xlsx]

## Sheet: Figure 7 - Supp. 1
Panel A, B, C, D, E
time (min)	GriK13dKO (#1)
1	0.889481	0.879615	0.852072	0.937109	0.860274	0.892795	0.90941	0.6936	1.04002	0.85413	0.910124	0.950789	0.866434	0.916715	0.853584	0.713874	0.447214	0.916246	0.741333	1.13137	1.18182	0.249041	0.984886	1.0114	0.977692	1.01379	0.760117	1.07703	0.975203	1.08675	1.06	1.1177	1.05693	1.09034	1	1.31605	1.12071	0.962963	1.04643	1.12625	0.907959	0.614636	0.928477	1.0185	1.16084
2	0.917267	0.917936	0.882843	0.618347	0.757132	0.91875	0.850871	0.711723	0.941534	0.708265	0.761577	0.802866	0.895193	0.939987	0.853584	0.802225	0	0.803954	0.791241	1.19293	0.989949	0.26221	0.874475	0.976187	1.16248	1.18151	1.10744	0.808608	0.980899	1.03232	1.20934	1.06402	0.960277	1.07814	0.943349	1.11371	0.818598	0.961596	1.10216	1.02404	0.849677	0.640184	1.01535	1.08593	1
3	0.947511	0.917936	1	0.612962	0.643823	0.844706	0.74957	0.711723	0.969819	0.59781	0.517357	0.748487	0.895193	0.805422	0.843996	0.696526	0.5	0.803954	0.831039	0.980581	1.08278	0.236088	0.65911	0.976187	1	0.909959	1.14017	0.808608	1.10988	1.08675	1.20934	0.819232	1.05934	1.08167	1.05612	0.705588	0.830455	0.960828	0.653047	1.13192	1.01675	0.563093	0.957876	1.08074	1
4	0.844533	0.882843	0.877058	0.626948	0.609878	0.844706	0.74957	0.696419	0.690749	0.582772	0.562126	0.71171	0.875376	0.773258	0.792084	0.696526	0	0.808901	0.82958	0.980581	1.18044	0.236088	0.764199	0.976187	1.2	0.977692	1.00778	0.883072	0.927119	1.15272	0.955249	0.819232	1.00138	1.18409	0	0.64522	0.894427	0.883962	0.600245	1.04604	1	0.537484	0.957876	0.744378	1.04319
5	0.4	0.806226	1	0.537603	0.62385	0.808608	0.782534	0.67082	0.563093	0.506561	0.536656	0.710247	0.825828	0.74155	0.835566	0.868243	0.223607	0.803954	0.588968	1.01379	1.17697	0.211725	0.713874	0.978046	1.21655	0.843801	1.17803	0.883072	0.927119	1.11161	0.740233	0.75	0.970236	1.04536	0.5	0.674489	0.754474	0.887229	0.5547	1.04604	1	0.485071	0.957876	0.860547	0.982194
6	0.447214	0.838274	1	0.480847	0.62385	0.833203	0.79185	0.624695	0.538145	0.506561	0.588235	0.620967	0.825828	0.773791	0.835566	0.75	0.2	0.802225	0.535539	0.838274	1.17697	0.223093	0.882843	0.964186	0.849837	0.566352	1.04002	1.00778	0.926049	0.93576	0.737643	0.753033	0.849837	1.10114	0.596285	0.697308	0.877058	0.852072	0.67082	1.04604	1	0.565685	0.957876	0.75	0.814379
7	0.471405	0.844533	1	0.540495	0.47978	0.918006	0.739709	0.676422	0.505261	0.377237	0.588235	0.523909	0.78296	0.806677	0.835566	0.583095	0.282843	0.819836	0.5	1	1.19818	0.248771	0.549442	0.964186	0.885316	0.566352	0.728431	1	0.925338	0.93576	0.754474	0.706274	0.890162	0.843996	0.620174	0.713831	0.882843	0.852072	0.620174	1.04604	0.737643	0.485071	0.916309	0.729964	0.541543
8	0.342997	0.849837	1	0.540495	0.48074	0.87699	0.739709	0.676422	0.488094	0.336953	0.603992	0.553349	0.747786	0.84075	0.72625	0.735215	0.171499	0.819836	0.455345	0.808608	1.19405	0.248771	0.790569	0.989545	0.739709	0.328798	0.707107	0.883452	0.851469	0.880471	0.485071	0.679073	0.874921	0.717958	0.848528	0.618347	1.14017	0.852072	0.549442	1.04604	0.835532	0.662589	0.916309	0.739183	0.596464
9	0.474342	0.849837	0.849837	0.486821	0.426875	0.83779	0.724491	0.711068	0.521356	0.339182	0.555889	0.533494	0.729964	0.843917	0.72625	0.838274	0.171499	0.744348	0.5	0.928477	1.09454	0.242362	0.790569	0.989545	0.614295	0.613572	0.790569	0.784465	0.842225	0.968963	0.5	0.626556	0.668508	0.734726	0.857493	1.04764	1.14017	0.852072	0.620174	1.04695	0.65192	0.662589	0.97727	0.852072	0.632456
10	0.474342	0.882843	0.849837	0.485071	0.426875	0.83779	0.6	0.690742	0.478007	0.264327	0.508987	0.419001	0.621982	0.843917	0.688457	0.808608	0.138675	0.744348	0.574412	0.877058	0.890327	0.242362	0.685994	1.0284	0.632456	0.613572	0.857493	0.715542	0.842225	0.791587	0.614295	0.666667	0.669534	0.66519	0.615699	0.858898	1.28571	0.852072	0.657596	0.994245	0.58722	0.563093	0.97727	0.740233	0.754474
11	0.700404	0.887298	0.857143	0.485071	0.390405	0.805999	0.646239	0.628168	0.461774	0.264327	0.650791	0.434865	0.528861	0.813101	0.636773	0.669534	0.158114	0.662714	0.500864	1	0.849837	0.266978	0.728869	0.990972	0.553066	0.657596	0.857493	0.640184	0.887132	0.842523	0.495261	0.700404	0.724286	0.714286	0.793291	0.923287	1.14286	0.889051	0.707107	0.994245	0.519875	0.5	0.790569	0.740233	0.788954
12	0.669534	0.922395	1.16667	0.480847	0.424859	0.83779	0.58722	0.662589	0.461774	0.198246	0.695141	0.415987	0.528861	0.781875	0.636773	0.570088	0	0.715542	0.500864	0.857493	0.737865	0.266978	0.766965	0.951435	0.754474	0.744348	0.857493	0.703598	0.915675	0.826047	0.614295	0.745356	0.724286	0.744348	0.793291	0.819836	1.14286	0.893002	0.707107	0.970143	0.4	0.5	0.808957	0.630286	1
13	0.669534	0.922395	1.15079	0.447214	0.339887	0.837871	0.622841	0.697486	0.433861	0.198246	0.781025	0.451938	0.477963	0.813101	0.671729	0.527046	0.185695	0.715542	0.51556	0.874475	0.671729	0.266076	0.566352	0.990296	0.754474	0.787839	0.685994	0.629317	0.967276	0.855303	0.519875	0.838274	0.614295	0.581238	0.793291	0.819836	1.14286	0.893002	0.821995	0.946943	0.242536	0.5	0.808957	0.447214	1.10454
14	0.67082	0.92	0.328798	0.474342	0.357771	0.881818	0.622841	0.697486	0.407647	0.198246	0.447214	0.548161	0.39148	0.806452	0.667947	0.527046	0.171499	0.744348	0.520963	0.707107	0.727607	0.242362	0.485071	0.992312	0.72111	0.848528	0.707107	0.497519	0.967276	0.921443	0.519875	0.925338	0.632456	0.694516	0.830455	0.819836	0.75	0.893002	0.821995	1	0.2	0.5	0.857493	0.441726	1.10454
15	0.641179	0.958333	0.392232	0.423999	0.368782	0.881737	0.570675	0.697486	0.379628	0.198246	0.299425	0.803921	0.30104	0.833333	0.667947	0.519875	0	0.75327	0.457615	0.65192	0.773021	0.234818	0.5	0.737068	0.923548	0.72111	0.824621	0.358766	0.933809	0.787839	0.527046	0.929981	0.707107	0.754615	0.764161	0.819836	0.857143	0.857887	0.868966	0.968297	0.4	0.620174	0.894427	0.349215	0.849837
16	0.567646	0.92	0.4	0.470767	0.368782	0.815251	0.5547	0.675463	0.299509	0.196116	0.282843	1.01029	0.30104	0.834	0.667947	0.5	0.171499	0.75327	0.405016	0.765641	0.803954	0.291071	0.618347	0.82382	1.04611	0.761577	0.824621	0.314658	0.793762	0.986394	0.527046	0.868744	0.724286	0.920447	0.707107	0.784465	0.875	0.857887	0.868966	0.701047	0.4	0.447214	0.835532	0.171499	0.589256
17	0.542326	0.884615	0.620174	0.20795	0.368782	0.815251	0.575543	0.690742	0.260342	0.240874	0.24037	1.10142	0.38208	0.834	0.612686	0.5	0	0.749532	0.356117	0.527046	0.685994	0.266978	0.566352	0.864747	0.921443	0.72111	1	0.271163	0.844049	1.0198	0.519875	0.868744	0.640184	0.968742	0.615699	0.701646	0.857143	0.857887	0.860233	1.15109	0.632456	0.371391	0.835532	0.282843	0.687184
18	0.656532	0.852657	0.519875	0.331042	0.358766	0.821624	0.588562	0.690742	0.322354	0.165521	0.268328	0.915505	0.448535	0.833333	0.667947	0.65192	0.181071	0.749532	0.461538	0.600925	0.707107	0.248771	0.5	0.923077	1.11803	0.796333	0.727607	0.307148	0.844049	0.8	0.519875	0.868744	0.620174	0.968742	0.681175	0.701646	0.848528	0.889051	0.838274	1	0.632456	0.765641	0.835532	0.282843	0.746577
19	0.46225	0.852657	0.5	0.310087	0.496904	0.826572	0.502801	0.677834	0.322354	0.185695	0.5	0.787184	0.445679	0.833333	0.667947	0.471405	0.106	0.674579	0.426875	0.5	0.618347	0.248771	0.371391	1.00347	0.894427	0.632456	0.727607	0.291386	0.844049	0.970143	0.5	0.868744	0.723241	0.920447	0.727607	0.877058	0.632456	0.889051	0.637377	1	0.519875	0.596285	0.916309	0.527046	0.693375
20	0.5	0.857887	0.519875	0.438529	0.735215	0.857642	0.442658	0.645169	0.338917	0.197642	0.632456	0.787184	0.436078	0.827586	0.620174	0.542326	0.111803	0.674579	0.478913	0.5	0.496139	0.248771	0.542326	1.00347	0.874475	0.447214	0.766965	0.464238	0.800391	0.970143	0.583095	0.963121	0.667947	0.920447	0.632456	0.894427	0.667947	0.889051	0.589015	0.904989	0.519875	0.632456	0.916309	0.527046	0.928477
21	0.589256	0.786526	0.677834	0.620174	0.746788	0.891107	0.435365	0.642857	0.318671	0.294508	0.537484	0.787184	0.405257	0.8	0.569376	0.471405	0.111803	0.661693	0.506211	0.5	0.485071	0.276091	0.707107	1	0.806226	0.468521	0.946864	0.419137	0.714083	0.970143	0.714286	0.940011	0.6895	0.920447	0.54139	0.894427	0.583095	0.889051	0.589015	0.856173	0.824621	0.727607	1.04536	0.527046	0.928477
22	0.461644	0.786526	0.666667	0.5547	0.806226	0.891107	0.36162	0.642857	0.377647	0.316228	0.421637	0.841021	0.428571	0.806452	0.567258	0.65192	0.164399	0.579741	0.498172	0.5	0.563093	0.268979	0.707107	1.12618	0.766965	0.474342	0.765641	0.392232	0.744378	1.03975	0.5	0.940011	0.824621	0.933053	0.656532	0.877058	0.515388	0.923195	0.632456	0.856173	0.824621	0.885316	1.04536	0.67082	0.780869
23	0.589256	0.786526	0.588348	0.5547	0.474342	0.891107	0.394922	0.645169	0.404888	0.276533	0.441726	0.780869	0.486554	0.806452	0.567258	0.566352	0.164399	0.572598	0.392232	0.5	0.349215	0.26221	0.72111	1.10982	1	0.474342	0.765641	0.398015	0.729964	1	0.637377	0.929981	0.724286	0.868966	0.575396	0.882843	0.515388	0.923195	0.632456	0.810005	0.8	0.883883	1.03816	0.742781	0.857493
24	0.666667	0.786526	0.666667	0.447214	0.557086	0.844363	0.488397	0.656865	0.445639	0.274125	0.441726	0.796333	0.477963	0.806452	0.567258	0.549442	0.124035	0.675725	0.560743	0.493197	0.392232	0.254493	0.565685	1	1.23669	0.5	0.707107	0.398015	0.729964	1.05475	0.515388	1	0.707107	0.795285	0.670478	0.766965	0.515388	0.923077	0.632456	1	0.784465	0.897527	1.03816	0.806226	0.745356
25	0.666667	0.786526	0.657596	0.447214	0.471405	0.846713	0.5	0.656865	0.430007	0.262613	0.525226	0.790569	0.477963	0.83933	0.556243	0.395285	0.124035	0.675725	0.437048	0.5	0.274721	0.254493	0.282843	1.0198	1.41421	0.447214	0.806226	0.404304	0.833333	1.05475	0.515388	0.934153	0.707107	0.852347	0.936329	0.583095	0.515388	0.884615	0.632456	0.882786	0.727607	0.666667	1.03816	0.806226	0.662589
26	0.640184	0.786526	0.657596	0.353553	0.542326	0.880553	0.460086	0.656865	0.410264	0.410264	0.685994	0.851469	0.477963	0.866826	0.406622	0.395285	0	0.719092	0.400471	0.565685	0.210819	0.256074	0.282843	0.921777	1.16619	0.447214	0.806226	0.434613	0.892288	1	0.5	0.937906	0.511408	0.852347	0.819288	0.632456	0.637377	0.888889	0.686803	0.932325	0.588348	0.614636	1.03816	0.707107	0.662589
27	0.640184	0.808608	0.6	0.353553	0.58722	0.840925	0.498172	0.645169	0.444994	0.45607	0.685994	0.851469	0.542326	0.834	0.383986	0.637377	0	0.722058	0.542326	0.565685	0.156174	0.237806	0.316228	0.921777	1	0.447214	0.72111	0.394922	0.892288	1	0.5	0.920869	0.669534	0.790569	0.857493	0.519875	0.565685	0.851852	0.790569	0.989949	0.493197	0.563093	1.03816	0.707107	0.618347
28	0.666667	0.84	0.493197	0.353553	0.588348	0.801413	0.498172	0.642857	0.543702	0.553066	0.542326	0.852347	0.522681	0.813101	0.399132	0.637377	0.124035	0.678511	0.517727	0.707107	0.156174	0.254493	0.282843	1.08812	1	0.570088	0.75	0.394922	0.821681	1.13529	0.428571	0.930721	0.669534	0.808608	0.727607	0.438529	0.5	0.851852	0.790569	1.07375	0.493197	0.5	1	0.707107	0.669534
29	0.666667	0.8	0.527046	0.33541	0.493197	0.834716	0.547056	0.642857	0.510852	0.553066	0.438529	0.790569	0.546781	0.83933	0.359635	0.566558	0	0.647369	0.613424	0.860233	0.220863	0.254493	0.395285	1.08812	0.765641	0.5	0.883883	0.36162	0.821681	1.13529	0.424264	0.882819	0.707107	0.765641	0.702247	0.519875	0.5	0.851852	0.894427	1.07375	0.493197	0.5	1.03816	0.707107	0.806226
30	0.819836	0.807692	0.519875	0.372104	0.5	0.831711	0.482573	0.642857	0.480569	0.497519	0.669534	0.797515	0.409171	0.866667	0.359635	0.566558	0.196116	0.660819	0.578836	0.848528	0.220863	0.247249	0.395285	1	0.808608	0.5	0.790569	0.333333	0.821681	1	0.434372	0.83099	0.667947	0.8149	0.559017	0.677834	0.5	0.815656	1.07497	0.97727	0.493197	0.383482	0.942809	0.693375	0.874475
31	0.874475	0.807692	0.519875	0.372104	0.415227	0.824621	0.521536	0.641223	0.453368	0.497519	0.632456	0.7145	0.412082	0.866667	0.345988	0.563093	0.196116	0.5	0.592043	0.835532	0.210819	0.247249	0.4	0.849677	1	0.474342	0.790569	0.333333	0.821681	0.94462	0.5	0.79016	0.746788	0.637377	0.479301	0.677834	0.666667	0.847028	1.14017	0.97727	0.493197	0.349215	0.877058	0.843527	0.707107
32	1.09668	0.807692	0.451754	0.175412	0.367607	0.824621	0.54139	0.641223	0.453368	0.452679	0.669534	0.697551	0.425436	0.833333	0.345988	0.563093	0.181071	0.539072	0.493865	0.566352	0.298142	0.279837	0.220863	0.796778	1.17444	0.474342	0.883883	0.412231	0.821681	0.94462	0.519875	0.779391	0.910642	0.66519	0.592749	0.620174	0.714286	0.847028	1.14017	0.97727	0.438529	0.349215	0.877058	0.894427	0.685994
33	0.955249	0.768662	0.451754	0.350823	0.479301	0.774089	0.573121	0.641223	0.423999	0.550707	0.72111	0.697551	0.425436	0.83933	0.367607	0.552158	0.128037	0.539072	0.529999	0.583095	0.371391	0.27257	0.392232	0.84191	1.24035	0.367607	0.883883	0.412231	0.857493	1.04611	0.519875	0.728758	0.707107	0.561591	0.620174	0.620174	0.589015	0.854481	0.841021	0.986394	0.620174	0.4	0.877058	0.857493	0.685994
34	0.711934	0.768662	0.555556	0.350823	0.391077	0.763997	0.616086	0.641223	0.458707	0.505146	0.447214	0.697551	0.4	0.83933	0.367607	0.637377	0.116248	0.539072	0.456172	0.428571	0.185695	0.245313	0.392232	0.84191	1.38675	0.367607	0.883883	0.419137	0.857493	1.04611	0.527046	0.694516	0.858898	0.800391	0.620174	0.707107	0.589015	0.817614	0.780869	0.986394	0.392232	0.441726	0.970143	0.745356	0.874475
35	0.553066	0.730229	0.555556	0.350823	0.316228	0.86859	0.616086	0.645169	0.511594	0.49029	0.519875	0.697551	0.4	0.83933	0.400715	0.625	0.116248	0.6027	0.578836	0.428571	0.185695	0.248771	0.537484	0.869971	1.41421	0.367607	0.883883	0.423451	0.857493	0.923548	0.515388	0.742016	0.780869	0.707107	0.5547	0.570088	0.589015	0.849015	0.796333	1.07175	0.727607	0.485071	0.942809	0.806226	0.707107
36	0.666667	0.703222	0.552158	0.350823	0.441726	0.83205	0.492548	0.574412	0.531795	0.553066	0.372678	0.755295	0.451243	0.83933	0.361062	0.5	0.108465	0.6027	0.585829	0.428571	0	0.248771	0.392232	0.851229	1.34164	0.367607	0.883883	0.423451	0.789639	0.891359	0.589015	0.742016	0.693375	0.707107	0.496139	0.67082	0.583095	0.843127	0.796333	1.07175	0.970143	0.637377	0.900617	0.806226	0.707107
37	0.563093	0.654525	0.632456	0.403113	0.543214	0.539072	0.485071	0.669534	0.52072	0.58722	0.471405	0.778559	0.3946	0.844329	0.334767	0.444444	0.108465	0.528655	0.573121	0.496139	0.223607	0.246755	0.384111	0.880909	1.53128	0.519875	0.72111	0.423451	0.789639	0.827606	0.589015	0.697308	0.740233	0.523424	0.529999	0.632456	0.848528	0.875923	0.796333	0.921954	1	0.485071	0.894427	0.806226	0.438529
38	0.565685	0.676847	0.637377	0.482573	0.588348	0.5	0.428746	0.618347	0.512292	0.640184	0.515079	0.759468	0.3946	0.844329	0.374394	0.496139	0.108465	0.528655	0.542326	0.424264	0.223607	0.246755	0.353553	0.916605	1.31306	0.519875	0.632456	0.338917	0.958706	0.857493	0.583095	0.743473	0.669534	0.653047	0.447214	0.632456	0.824163	0.873077	0.796333	1.06302	1	0.415227	0.910642	0.700404	0.5547
39	0.565685	0.728617	0.637377	0.482573	0.570088	0.461538	0.46225	0.615385	0.512292	0.493197	0.515079	0.759468	0.372033	0.844329	0.359635	0.496139	0.108465	0.528655	0.542326	0.632456	0.223607	0.223607	0.333333	0.94462	0.438529	0.620174	0.67082	0.338917	0.915929	0.971286	0.583095	0.743473	0.632456	0.653047	0.482573	0.67082	0.824163	0.86983	0.614636	1.06302	1	0.542326	0.724398	0.707107	0.493197
40	0.447214	0.74935	0.571429	0.482573	0.5	0.392232	0.399043	0.732933	0.531795	0.54139	0.509902	0.759468	0.352261	0.813101	0.366155	0.496139	0	0.594737	0.585206	0.566352	0.158114	0.250574	0.493865	0.949758	0.438529	0.620174	0.632456	0.338917	0.8574	1	0.677834	0.743473	1	0.685994	0.596795	0.67082	0.848528	0.86983	0.65192	1.14017	0.921954	0.485071	0.724398	0.618347	0.6
41	0.424264	0.736352	0.571429	0.482573	0.493197	0.435639	0.356915	0.729923	0.511594	0.691034	0.509902	0.755295	0.372526	0.813101	0.367607	0.5	0	0.690268	0.570088	0.583095	0.158114	0.244028	0.447214	0.914443	0.58722	0.620174	0.874475	0.387671	0.8574	1.02956	0.669534	0.743473	0.897527	0.69843	0.680074	0.67082	0.754474	0.82645	0.677834	1.14017	0.921954	0.485071	0.820529	0.766965	0.588348
42	0.565685	0.738433	0.496139	0.5	0.415227	0.460086	0.356915	0.669534	0.511594	0.57594	0.473432	0.76193	0.352261	0.844329	0.367607	0.496139	0	0.747409	0.511408	0.519875	0.158114	0.244028	0.316228	1	0.669534	0.620174	0.806226	0.419137	0.8574	1.02956	0.766965	0.743473	0.897527	0.632456	0.740233	0.67082	0.72111	0.818598	0.687184	1.07259	1	0.5	0.808608	0.923548	0.588348
43	0.570088	0.588968	0.441726	0.54139	0.415227	0.841021	0.461774	0.666667	0.50978	0.537484	0.537484	0.76193	0.382821	0.871112	0.391077	0.511408	0	0.690268	0.5	0.657596	0.158114	0.217265	0.349215	0.908153	0.669534	0.588348	0.72111	0.419137	0.821995	1	0.766965	0.757228	0.769309	0.57496	0.740233	0.632456	0.72111	0.818598	0.687184	1.07259	1	0.5	0.806226	0.942809	0.6
44	0.707107	0.590117	0.441726	0.471405	0.415227	0.570088	0.497859	0.666667	0.519034	0.503891	0.328798	0.76193	0.382821	0.871112	0.406622	0.515388	0	0.707107	0.512615	0.493197	0.25	0.211725	0.493865	0.892844	0.58722	0.588348	0.637377	0.392232	0.821995	1	0.707107	0.757228	0.824621	0.572598	0.680074	0.570088	0.72111	0.818598	0.687184	1.07259	0.921954	0.447214	0.895806	0.827606	0.632456
45	0.707107	0.578193	0.433861	0.29361	0.5	0.570088	0.497859	0.818182	0.5	0.471405	0.353553	0.807979	0.382821	0.874573	0.440407	0.515388	0.1	0.626894	0.512615	0.519875	0.176777	0.211725	0.542326	1.02774	0.735215	0.493197	0.565685	0.392232	0.821995	1	0.614295	0.710803	0.632456	0.629317	0.790569	0.509902	0.707107	0.857493	0.519875	1.02282	0.707107	0.473432	0.883883	0.849837	0.620174
46	0.5	0.54139	0.447214	0.468165	0.58722	0.454077	0.497859	0.818182	0.431073	0.533333	0.473432	0.795285	0.372526	0.873853	0.441461	0.667947	0.1	0.626894	0.667947	0.450694	0.176777	0.211725	0.542326	1.02657	0.877058	0.493197	0.727607	0.403113	0.821995	1	0.707107	0.71891	0.632456	0.594692	0.745356	0.447214	0.707107	0.854794	0.566352	0.978426	0.894427	0.479301	1.00778	0.874475	0.620174
47	0.421637	0.54139	0.5	0.421637	0.614295	0.471405	0.497859	0.823217	0.457222	0.461538	0.614295	0.795285	0.405257	0.842684	0.479616	0.637377	0	0.626894	0.6895	0.450694	0.395285	0.211725	0.342997	1.02376	0.885316	0.514496	0.632456	0.447214	0.821995	1	0.638877	0.736627	0.614295	0.594692	0.737865	0.5547	0.707107	0.847486	0.566352	0.873038	0.742781	0.620174	1.00778	0.874475	0.5
48	0.421637	0.543807	0.5	0.421637	0.614295	0.523424	0.503413	0.823217	0.457222	0.4	0.632456	0.795285	0.405257	0.844414	0.479616	0.637377	0	0.628117	0.684811	0.450694	0.618347	0.237806	0.342997	1.02899	0.877058	0.268328	0.632456	0.442658	0.8574	1	0.638877	0.736627	0.614295	0.671729	0.737865	0.5547	0.656532	0.80522	0.434372	1.02282	0.742781	0.656532	1.00778	0.874475	0.415227
49	0.537484	0.425013	0.511408	0.421637	0.519875	0.511408	0.602506	0.806226	0.5	0.444444	0.583095	0.808608	0.352261	0.839442	0.439648	0.625	0.164399	0.628117	0.737564	0.441726	0.618347	0.244028	0.5	1.05975	1.05612	0.294174	0.537484	0.447214	0.910642	0.877058	0.72111	0.71891	0.566352	0.675863	0.737865	0.415227	0.685994	0.732177	0.434372	1.02282	0.742781	0.474342	1.14017	0.874475	0.383482
50	0.447214	0.350474	0.583095	0.357771	0.519875	0.517727	0.535373	0.814822	0.479273	0.441726	0	0.808608	0.372526	0.839442	0.438599	0.447214	0.164399	0.603692	0.669534	0.441726	0.618347	0.249041	0.5	0.902986	1	0.287348	0.666667	0.448764	0.8574	1	0.72111	0.661531	0.632456	0.675863	0.649934	0.58722	0.6	0.687143	0.434372	1.02282	0.742781	0.632456	1.15175	0.659768	0.333333
51	0.333333	0.306481	0.496139	0.392232	0.5	0.464238	0.465361	0.814822	0.457222	0.552158	0.25	0.759841	0.440415	0.78222	0.461774	0.447214	0.101015	0.602355	0.656532	0.552158	0.618347	0.217265	0.421637	0.785136	0.72111	0.392232	0.735215	0.454545	0.8574	1.02956	0.735215	0.666667	0.563093	0.808901	0.748562	0.58722	0.557086	0.642161	0.415227	1.02282	0.742781	0.838274	1.14017	0.553066	0.353553
52	0.333333	0.308043	0.398015	0.542326	0.353553	0.404226	0.488397	0.814822	0.457222	0.415227	0.27735	0.795285	0.415227	0.78222	0.481584	0.398015	0.101015	0.536293	0.6	0.552158	0.618347	0.217265	0.349215	0.785136	0.824621	0.404304	0.735215	0.452679	0.789639	0.902986	0.735215	0.666667	0.632456	0.724398	0.656532	0.620174	0.557086	0.592043	0.415227	0.934137	0.742781	0.166667	1.14017	0.618347	0.262613
53	0.471405	0.280828	0.412311	0.482573	0.447214	0.395285	0.434613	0.804984	0.5	0.306786	0.415227	0.807979	0.278543	0.809028	0.481584	0.357771	0	0.574412	0.509902	0.496139	0.565685	0.217265	0.5	0.785136	0.745356	0.404304	0.735215	0.427179	0.789639	0.902986	0.735215	0.666667	0.632456	0.724398	0.656532	0.677834	0.632456	0.546781	0.415227	0.859566	0.588348	0.164399	1	0.596795	0.27735
54	0.461644	0.120824	0.458123	0.394922	0.5	0.395285	0.413803	0.790569	0.5	0.3125	0.438529	0.795285	0.362245	0.750284	0.481584	0.392232	0.141421	0.574412	0.605257	0.441726	0.5	0.260144	0.156174	0.685994	1.14354	0.392232	0.677834	0.482573	0.789639	0.882843	0.735215	0.661531	0.72111	0.69843	0.717958	0.735215	0.632456	0.478024	0.415227	0.88234	0.588348	0.328798	1	0.711934	0.282843
55	0.461644	0.119438	0.515388	0.394922	0.620174	0.474045	0.529926	0.802225	0.492709	0.318689	0.27735	0.807979	0.374887	0.751134	0.482573	0.392232	0.141421	0.565685	0.52791	0.455321	0.395285	0.25328	0.158114	0.685994	0.946864	0.392232	0.677834	0.539072	0.789639	0.835532	0.745356	0.671729	0.72111	0.632456	0.617611	0.745356	0.632456	0.452204	0.473432	0.980581	0.620174	0.519875	1	0.928477	0.282843
56	0.461644	0.119438	0.458123	0.421637	0.742781	0.474045	0.529926	0.8	0.523984	0.405518	0.27735	0.869171	0.374887	0.729459	0.482573	0.404304	0.108465	0.565685	0.452679	0.493865	0.493865	0.25328	0.333333	0.641179	1	0.398015	0.677834	0.521536	0.789639	0.857143	0.745356	0.687874	0.72111	0.596285	0.649934	0.686803	0.614636	0.47594	0.557086	0.873038	0.438529	0.687184	1	0.782624	0.447214
57	0.572598	0.119438	0.351364	0.527046	0.742781	0.581238	0.435143	0.79603	0.523984	0.357143	0.223607	0.869171	0.366088	0.72111	0.482573	0.404304	0.108465	0.620174	0.444994	0.493865	0.493865	0.189253	0.242536	0.618347	1	0.441726	0.677834	0.498172	0.789639	1	0.735215	0.682638	1.14017	0.596285	0.670478	0.745356	0.614636	0.47594	0.632456	0.786646	0.438529	0.687184	1.01015	0.843274	0.447214
58	0.461644	0.120212	0.351364	0.527046	0.67082	0.640184	0.384615	0.8	0.484724	0.357143	0.424264	0.930054	0.392232	0.72111	0.482573	0.368782	0.108465	0.594737	0.544059	0.528059	0.618347	0.158705	0.2	0.618347	1	0.444444	0.677834	0.54139	0.789639	0.946864	0.735215	0.741096	0.901388	0.707107	0.670478	0.58722	0.742781	0.367912	0.171499	0.902986	0.438529	0.687184	0.883883	0.843274	0.447214
59	0.353553	0.124902	0.455321	0.434613	0.570088	0.581238	0.384615	0.79603	0.511825	0.4	0.447214	0.861602	0.364729	0.719429	0.482573	0.410264	0.128037	0.594737	0.5547	0.461644	0.618347	0.133907	0.471405	0.653047	1	0.5	0.677834	0.428746	0.804778	1	0.735215	0.779391	0.901388	0.625	0.766261	0.58722	0.742781	0.262794	0.149071	0.827415	0.438529	0.666667	1.01015	0.710742	0.447214
60	0.248069	0.142411	0.584103	0.342997	0.614295	0.461644	0.384615	0.888889	0.468521	0.37427	0.5	0.798228	0.308043	0.74225	0.482573	0.496904	0.2	0.594737	0.511408	0.461644	0.353553	0.133907	0.563093	0.766965	1	0.5	0.677834	0.438529	0.775217	1	0.632456	0.737405	0.901388	0.559017	0.766261	0.5547	0.742781	0.262794	0.149071	0.827415	0.438529	0.565685	1.01015	0.557086	0.565685
61	0.149071	0.131306	0.707107	0.383482	0.745356	0.667947	0.395285	0.773021	0.49121	0.644772	0.570088	0.798228	0.249086	0.74225	0.445679	0.496904	0.235702	0.558156	0.521536	0.507371	0.25	0.130573	0.707107	0.72111	1	0.707107	0.677834	0.460179	0.775217	0.860233	0.632456	0.734046	0.901388	0.637377	0.649934	0.58722	0.707107	0.262794	0.196116	0.827415	0.542326	0.565685	1.01015	0.557086	0.697486
62	0.333333	0.131306	0.765641	0.383482	0.581238	0.784465	0.33541	0.777778	0.47737	0.59081	0.526235	0.688991	0.242536	0.74225	0.422764	0.493865	0.27735	0.401112	0.561591	0.566558	0.25	0.156639	0.395285	0.88083	1	0.686803	0.677834	0.493197	0.775217	0.961769	0.583095	0.742016	0.559017	0.675863	0.649934	0.58722	0.685994	0.272462	0.196116	0.830455	0.685994	0.583095	1	0.473432	0.707107
63	0.333333	0.131306	0.765641	0.447214	0.5547	0.746577	0.342997	0.773021	0.640312	0.536656	0.626013	0.693375	0.255704	0.549049	0.424822	0.455321	0.471405	0.381058	0.613308	0.555556	0.25	0.1585	0.395285	0.784465	1	0.686803	0.669534	0.493197	0.775217	0.961769	0.583095	0.743473	0.559017	0.784465	0.609208	0.58722	0.69843	0.677834	0.196116	0.783449	0.542326	0.583095	1	0.517727	0.72111
64	0.27735	0.151059	0.700404	0.553066	0.471405	0.746577	0.374766	0.773021	0.752009	0.485643	0.650791	0.693375	0.35781	0.549335	0.424822	0.511408	0.632456	0.535844	0.447214	0.507371	0.395285	0.164942	0.395285	0.754474	1	0.632456	0.669534	0.581238	0.860547	0.961769	0.589015	0.742016	0.242536	0.702728	0.790569	0.656532	0.790569	0.677834	0.128037	0.784465	0.685994	0.583095	1	0.56477	0.632456
65	0.29361	0.163846	0.618347	0.5	0.438529	0.404888	0.380143	0.773021	0.757842	0.434372	0.744208	0.673905	0.331349	0.482759	0.386534	0.555556	0.447214	0.444994	0.423451	0.507371	0.242536	0.212367	0.395285	0.789639	0.784465	0.632456	0.669534	0.505076	0.88234	0.961769	0.589015	0.742016	0.242536	0.69843	0.680074	0.537484	0.894427	0.65192	0.181071	0.88234	0.685994	0.583095	1	0.737643	0.600925
66	0.310087	0.391077	0.553066	0.497519	0.5	0.563093	0.380143	0.79603	0.583938	0.474045	0.625	0.72111	0.396573	0.499681	0.386248	0.552158	0.447214	0.444994	0.383482	0.507371	0.242536	0.1585	0.447214	0.780869	1	0.677834	0.669534	0.542326	0.923548	0.821995	0.583095	0.789844	0.242536	0.69843	0.680074	0.632456	0.69843	0.65192	0.181071	0.923548	0.565685	0.583095	1	0.824163	0.519875
67	0.349215	0.391077	0.455321	0.507371	0.58722	0.640184	0.34001	0.784465	0.682504	0.434372	0.625	0.710634	0.361551	0.499681	0.384331	0.441726	0.447214	0.447214	0.423999	0.507371	0.171499	0.183829	0.559017	0.754474	0.921954	0.657596	0.669534	0.581238	0.80727	0.806226	0.583095	0.755136	0.316228	0.69843	0.680074	0.588348	0.910642	0.5	0.181071	0.923548	0.5547	0.632456	1.11803	0.824163	0.614295
68	0.316228	0.606339	0.485071	0.455321	0.620174	0.640184	0.367607	0.748562	0.712262	0.4	0.707107	0.716024	0.380006	0.250889	0.346154	0.441726	0.316228	0.447214	0.604292	0.497519	0.171499	0.183829	0.395285	0.515388	1.14017	0.493197	0.669534	0.65192	0.87073	0.838274	0.583095	0.757228	0.6	0.702728	0.680074	0.588348	0.841021	0.5	0.259938	0.963328	0.447214	0.592749	1.10744	0.824163	0.614295
69	0.298142	0.727607	0.542326	0.410264	0.519875	0.640184	0.419137	0.79421	0.77079	0.481664	0.72111	0.753449	0.380006	0.242133	0.310087	0.496139	0.27735	0.406558	0.527046	0.497519	0.171499	0.181889	0.395285	0.515388	0.946864	0.493197	0.669534	0.65192	0.87073	0.838274	0.493197	0.79016	0.421637	0.702728	0.680074	0.701646	0.841021	0.5	0.383482	0.94462	0.72111	0.707107	1.10744	0.737643	0.566352
70	0.342997	0.383482	0.542326	0.455321	0.723241	0.640184	0.419137	0.790569	0.744348	0.45607	0.632456	0.751134	0.392232	0.253297	0.282843	0.496139	0.2	0.463547	0.495261	0.410264	0.342997	0.186794	0.349215	0.451754	1	0.493197	0.570088	0.65192	0.94462	0.838274	0.493197	0.839442	0.618347	0.629317	0.717958	0.657596	0.841021	0.5	0.383482	0.963328	0.600925	0.666667	1.10744	0.737643	0.700404
71	0.342997	0.421998	0.542326	0.618347	0.79421	0.693375	0.4	0.757798	0.744348	0.5	0.868744	0.754474	0.388613	0.253297	0.282617	0.496139	0.2	0.506897	0.509902	0.410264	0.349215	0.186794	0.447214	0.687184	1	0.493197	0.570088	0.559017	0.94462	0.838274	0.493197	0.841314	0.666667	0.629317	0.717958	0.806226	0.790569	0.765641	0.441726	0.945221	0.697486	0.666667	1.1327	0.713874	0.700404
72	0.383482	0.473432	0.542326	0.618347	0.744348	0.745356	0.481664	0.597022	0.838274	0.415227	1	0.812341	0.365478	0.179406	0.322233	0.496139	0.171499	0.560008	0.507371	0.410264	0.4	0.186794	0.342997	0.728431	0.980581	0.493197	0.570088	0.559017	0.94462	0.946864	0.493197	0.841314	0.570088	0.596464	0.651558	0.800943	0.559017	0.765641	0.441726	0.945221	0.6	0.5547	1.16619	0.651153	0.700404
73	0.342997	0.537484	0.614295	0.5	0.723241	0.727607	0.481664	0.703598	0.838274	0.54139	0.830455	0.758433	0.347728	0.169967	0.361926	0.496139	0	0.604152	0.469272	0.398015	0.4	0.186794	0.383482	0.714286	0.824621	0.519875	0.570088	0.526235	0.963328	0.946864	0.657596	0.877058	0.353553	0.650791	0.60208	0.800943	0.790569	0.787839	0.563093	0.949119	0.707107	0.5547	1	0.620174	0.707107
74	0.349215	0.5	0.614295	0.447214	0.723241	0.662589	0.481664	0.773021	0.826095	0.760117	0.372104	0.743705	0.342997	0.169967	0.361926	0.496139	0	0.583095	0.372526	0.563093	0.509902	0.160686	0.421637	0.868966	0.8	0.592749	0.921954	0.526235	0.963328	1	0.565685	0.877058	0.570088	0.553066	0.54139	0.800943	0.824621	0.894427	0.509902	0.948683	0.707107	0.667947	1	0.707107	0.848528
75	0.353553	0.620174	0.58722	0.437237	0.511408	0.542326	0.519875	0.777778	0.846901	0.643921	0.383482	0.743705	0.285831	0.166667	0.321429	0.496139	0	0.570088	0.371391	0.444444	0.780869	0.131306	0.328798	0.883883	0.588348	0.592749	0.707107	0.526235	0.963328	0.851469	0.424264	0.851469	0.824621	0.447214	0.54139	0.765641	0.790569	0.894427	0.316228	0.948683	0.707107	0.723241	1.10744	0.75	0.860233
76	0.353553	0.58722	0.58722	0.542326	0.496139	0.632456	0.519875	0.675863	0.834597	0.460977	0.361926	0.734726	0.27735	0.169873	0.323407	0.372104	0.111803	0.532152	0.380521	0.444444	1	0.131306	0.519875	0.875	0.765641	0.697486	0.707107	0.620174	0.945221	0.806226	0.565685	0.896146	0.8	0.537484	0.54139	0.79421	0.790569	0.65192	0.310087	0.921954	0.824621	0.723241	1	0.830455	0.849837
77	0.312348	0.557086	0.566352	0.58722	0.412311	0.589256	0.442658	0.675863	0.752009	0.418638	0.203279	0.796566	0.33282	0.2	0.323201	0.372104	0.116248	0.348263	0.395925	0.555556	0.883452	0.160686	0.493197	0.888889	0.58722	0.614295	0.707107	0.65192	0.963328	0.677834	0.447214	0.878743	0.808608	0.553066	0.540495	0.784465	0.8	0.830455	0.312348	1.02439	0.800943	0.723241	0.971286	0.942809	0.527046
78	0.349215	0.565685	0.482573	0.557086	0.420703	0.542326	0.367607	0.785674	0.802225	0.5	0.149071	0.923548	0.337411	0.166574	0.333105	0.412082	0	0.348263	0.386632	0.555556	0.69843	0.152787	0.65192	0.79603	0.58722	0.542326	0.707107	0.65192	0.94462	0.707107	0.447214	0.896146	1	0.659768	0.540495	0.707107	0.6	0.830455	0.312348	1.02282	0.707107	0.838274	0.971286	0.841021	0.743294
79	0.353553	0.5	0.482573	0.58722	0.626013	0.542326	0.367607	0.707107	0.802225	0.546781	0.286299	0.933053	0.337411	0.166574	0.333105	0.393919	0.2	0.529999	0.392232	0.584103	0.563093	0.151974	0.666667	0.802225	0.519875	0.493865	0.707107	0.5547	0.87073	0.707107	0.447214	0.896146	1	0.662589	0.423999	0.745356	0.395285	0.766965	0.542326	0.894427	0.614636	0.877058	0.971286	0.841021	0.633431
80	0.434372	0.5	0.596795	0.392232	0.626013	0.493197	0.359908	0.608276	0.729923	0.546781	0.336336	0.943349	0.337411	0.169591	0.321224	0.393919	0.447214	0.503413	0.450522	0.584103	0.563093	0.151974	0.780869	0.802225	0.620174	0.447214	0.58722	0.5547	0.87073	0.542326	0.511408	0.877058	0.669534	0.662589	0.464991	0.727607	0.395285	0.766965	0.542326	0.890327	0.614636	0.894427	0.928477	0.802773	0.391077
81	0.434372	0.618347	0.596795	0.5	0.515388	0.543214	0.359908	0.707107	0.729923	0.5	0.336336	0.838274	0.337411	0.235571	0.344623	0.614636	0.447214	0.581016	0.49029	0.485071	0.583095	0.151974	0.780869	0.608276	0.58722	0.438529	0.58722	0.657596	0.79185	0.542326	0.519875	0.883491	0.707107	0.659768	0.464991	0.857493	0.25	0.766965	0.485071	0.890327	0.558504	0.894427	1.05409	0.869227	0.461644
82	0.383482	0.669534	0.596795	0.441726	0.433411	0.543214	0.363803	0.707107	0.819836	0.474045	0.353553	0.808608	0.396573	0.235571	0.323407	0.438529	0.632456	0.65192	0.407251	0.485071	0.596285	0.151974	0.666667	0.620174	0.618347	0.523424	0.65192	0.657596	0.803882	0.559017	0.493197	0.877058	0.72111	0.659768	0.512148	0.857493	0.171499	0.790569	0.5	0.910642	0.558504	0.883883	0.942809	0.851469	0.461644
83	0.349215	0.707107	0.618347	0.5	0.351799	0.461644	0.333333	0.605257	0.895533	0.434372	0.267999	0.738818	0.367607	0.268593	0.341231	0.447214	0.196116	0.604292	0.404061	0.391077	0.760117	0.151974	0.5	0.511408	0.618347	0.519875	0.707107	0.542326	0.803882	0.468521	0.493197	0.877058	0.620174	0.798706	0.52791	0.857493	0.447214	0.848528	0.5	1.02439	0.558504	0.637377	0.942809	0.851469	0.493197
84	0.4	0.72111	0.618347	0.667947	0.47036	0.537484	0.309173	0.605257	0.895533	0.517727	0.222222	0.734726	0.367607	0.235571	0.341231	0.350823	0.121268	0.529999	0.380006	0.496564	0.760117	0.155764	0.434372	0.52791	0.618347	0.511408	0.65192	0.5	0.803882	0.474342	0.565685	0.877058	0.559017	0.798706	0.52791	0.910642	0.447214	0.669534	0.559017	1.13312	0.437237	0.662589	0.942809	0.739709	0.424264
85	0.509902	0.806226	0.711934	0.667947	0.474045	0.537484	0.287754	0.671729	0.895806	0.557086	0.333333	0.733333	0.367607	0.210701	0.298398	0.350823	0.117041	0.529999	0.425735	0.474342	0.760117	0.155764	0.549442	0.677834	0.565685	0.566352	0.687184	0.5	0.787343	0.519875	0.565685	0.877058	0.620174	0.711934	0.52791	0.808608	0.549442	0.806226	0.559017	1.01813	0.585206	0.441726	0.961769	0.739709	0.360555
86	0.632456	0.848528	0.727607	0.5547	0.559017	0.67082	0.210819	0.671729	0.883452	0.507673	0.353553	0.733333	0.367607	0.253297	0.298602	0.392232	0.138675	0.529999	0.422447	0.58722	0.874475	0.130573	0.519875	0.744348	0.637377	0.493197	0.632456	0.599625	0.787343	0.632456	0.565685	0.869971	0.806226	0.727607	0.527046	0.869227	0.54139	0.848528	0.637377	1.01813	0.585206	0.441726	0.961769	0.570088	0.419137
87	0.67082	0.707107	0.606339	0.447214	0.438529	0.353553	0.268742	0.597022	0.883452	0.460977	0.353553	0.714286	0.367607	0.28755	0.298602	0.461644	0	0.374766	0.333333	0.419137	0.796333	0.130573	0.600925	0.764375	0.780869	0.493197	0.620174	0.599625	0.787343	0.620174	0.565685	0.863263	0.849837	0.737643	0.584103	0.954521	0.473432	0.848528	0.565685	1.01813	0.495261	0.493865	0.961769	0.570088	0.509902
88	0.746577	0.620174	0.482573	0.5547	0.438529	0.434372	0.251823	0.597022	0.883452	0.373288	0.336336	0.785714	0.367607	0.28755	0.298602	0.493197	0	0.374766	0.397105	0.572598	0.796333	0.284229	0.600925	0.722058	0.790569	0.493197	0.620174	0.599625	0.803882	0.620174	0.565685	0.877058	0.833333	0.766965	0.584103	0.784465	0.566352	0.72111	0.447214	1.01813	0.495261	0.542326	0.961769	0.570088	0.509902
89	0.746577	0.69843	0.482573	0.5547	0.362143	0.495261	0.228035	0.5	0.993884	0.49029	0.336336	0.785714	0.331349	0.318068	0.298398	0.493197	0	0.374766	0.384726	0.572598	0.796333	0.211857	0.514496	0.666667	0.72111	0.493197	0.620174	0.599625	0.803882	0.808608	0.565685	0.892288	0.821995	0.653047	0.584103	0.840771	0.383482	0.72111	0.72111	1.02439	0.388514	0.542326	0.961769	0.570088	0.581238
90	0.819836	0.69843	0.447214	0.596795	0.339182	0.496564	0.228035	0.675863	1.00615	0.478913	0.380521	0.788954	0.33541	0.335218	0.294508	0.543214	0.220863	0.449719	0.355519	0.461644	0.643921	0.191844	0.473432	0.685994	0.72111	0.542326	0.632456	0.566352	0.787343	0.677834	0.565685	0.892288	0.857493	0.58722	0.584103	0.840771	0.374828	0.632456	0.75	0.916246	0.447214	0.72111	0.860233	0.570088	0.581238
91	0.724286	0.69843	0.447214	0.596795	0.399114	0.447214	0.251823	0.754474	1	0.488397	0.362143	0.785714	0.279508	0.324021	0.294508	0.543214	0.447214	0.456172	0.431131	0.509902	0.707107	0.140293	0.58722	0.727607	0.824621	0.589256	0.588348	0.666667	0.707107	0.632456	0.571429	0.892288	0.874475	0.58722	0.584103	0.843274	0.333333	0.806226	0.848528	0.916246	0.618347	0.565685	0.860233	0.570088	0.559017
92	0.724286	0.790569	0.368782	0.60208	0.364216	0.392232	0.256885	0.787839	0.905357	0.49029	0.351799	0.788954	0.279508	0.268593	0.305415	0.509902	0.485071	0.410997	0.446482	0.461644	0.65192	0.140293	0.58722	0.67082	0.69843	0.589256	0.588348	0.618347	0.724503	0.583095	0.428571	0.892288	0.766965	0.669534	0.584103	0.784465	0.333333	0.637377	0.848528	0.916246	0.618347	0.632456	1	0.680074	0.559017
93	0.640184	0.72111	0.368782	0.60208	0.364216	0.511408	0.356235	0.787839	0.814822	0.45607	0.404304	0.783718	0.223607	0.268147	0.335155	0.565685	0.223607	0.412231	0.456172	0.5	0.549442	0.148166	0.537484	1	0.728869	0.5	0.632456	0.591969	0.773265	0.614295	0.428571	0.86859	0.745356	0.700404	0.584103	0.620174	0.272727	0.509902	0.848528	0.916246	0.618347	0.685994	1	0.711934	0.523424
94	0.620174	0.559017	0.368782	0.5	0.339182	0.509902	0.356235	0.711934	0.747409	0.350823	0.447214	0.783718	0.279508	0.235571	0.335155	0.565685	0	0.455922	0.458634	0.485071	0.802773	0.157774	0.473432	1	0.5547	0.5	0.632456	0.65372	0.840348	0.614295	0.519875	0.86859	0.632456	0.549442	0.584103	0.526235	0.286299	0.509902	0.848528	1.03078	0.618347	0.75	1	0.711934	0.5
95	0.614636	0.874475	0.404304	0.642161	0.339182	0.592749	0.353553	0.740233	0.747409	0.392232	0.404304	0.783718	0.272367	0.209626	0.335155	0.565685	0	0.540495	0.361926	0.485071	0.620174	0.196537	0.371391	0.951831	0.784465	0.543214	0.632456	0.686803	0.768451	0.583095	0.519875	0.808957	0.588348	0.412082	0.584103	0.526235	0.286299	0.894427	0.894427	0.910014	0.563093	0.790569	0.942809	0.711934	0.523424
96	0.614636	0.874475	0.342405	0.546781	0.262613	0.592749	0.412311	0.802773	0.747409	0.392232	0.413023	0.8	0.264999	0.209626	0.323201	0.565685	0	0.530171	0.322585	0.563093	0.667947	0.181422	0.496564	0.882843	0.906765	0.509902	0.632456	0.632456	0.768451	0.583095	0.5	0.808957	0.727607	0.412082	0.584103	0.588348	0.272727	0.894427	0.806226	0.877058	0.563093	0.948683	1	0.798706	0.460977
97	0.5547	0.614636	0.368782	0.454077	0.262613	0.614295	0.451243	0.808608	0.632456	0.49029	0.429783	0.800995	0.22188	0.209626	0.323407	0.565685	0	0.438529	0.368105	0.493865	0.581238	0.199224	0.371391	1.00951	0.906765	0.543214	0.632456	0.559017	0.8	0.687184	0.632456	0.808957	0.727607	0.485071	0.527046	0.588348	0.333333	0.951972	1	0.877058	0.563093	0.806226	0.808608	0.760117	0.5
98	0.5547	0.620174	0.310087	0.5	0.262613	0.614295	0.468521	0.887954	0.58712	0.536656	0.413023	0.800995	0.235702	0.181992	0.323407	0.565685	0	0.392232	0.36329	0.493865	0.6	0.224363	0.29361	0.757132	0.949968	0.543214	0.632456	0.474045	0.8	0.687184	0.686803	0.872172	0.563093	0.596795	0.584103	0.67082	0.25	1.07703	0.848528	0.992278	0.618347	0.806226	0.824621	0.656532	0.523424
99	0.572598	0.542326	0.434372	0.570088	0.210352	0.583095	0.535373	0.819836	0.710634	0.542326	0.4287	0.802773	0.342405	0.217242	0.333148	0.637377	0.171499	0.38208	0.316228	0.493865	0.572598	0.203917	0.333333	0.737564	0.843527	0.509902	0.632456	0.519875	0.860233	0.583095	0.632456	0.859412	0.662589	0.596795	0.485071	0.707107	0.307692	0.824621	0.632456	0.992278	0.565685	0.806226	0.824621	0.656532	0.523424
100	0.620174	0.760117	0.54139	0.546781	0.339182	0.728431	0.535373	0.819836	0.913625	0.468165	0.410264	0.802773	0.424918	0.217242	0.333148	0.637377	0.171499	0.334767	0.393341	0.493865	0.572598	0.203917	0.164399	0.800943	0.877058	0.571772	0.588348	0.745356	0.920869	0.632456	0.474342	0.796778	0.637377	0.666667	0.461644	0.570088	0.307692	0.790569	0.415227	0.992278	0.565685	0.830455	0.824621	0.754474	0.523424
101	0.666667	0.961769	0.54139	0.642161	0.266076	0.632456	0.575224	0.8	0.509902	0.370117	0.406946	0.7526	0.424918	0.181992	0.333148	0.637377	0	0.334767	0.377308	0.563093	0.543214	0.203917	0.164399	0.848528	0.830455	0.571772	0.588348	0.745356	0.920869	0.677834	0.632456	0.849528	0.563093	0.537484	0.543214	0.570088	0.307692	0.728869	0.5	1.12318	0.565685	0.830455	0.910642	0.632456	0.567646
102	0.707107	0.754474	0.383482	0.642161	0.415227	0.625	0.575224	0.8	0.434372	0.434613	0.406946	0.7526	0.424918	0.517727	0.333148	0.637377	0	0.54139	0.361926	0.563093	0.5	0.203917	0.333333	0.848528	0.760117	0.571772	0.727607	0.745356	0.860233	0.677834	0.65192	0.849528	0.69843	0.527046	0.509902	0.525226	0.307692	0.707107	0.5	1.11631	0.565685	0.765641	0.910642	0.754474	0.546781
103	0.707107	0.5	0.342997	0.666667	0.333333	0.583095	0.561591	0.883452	0.464991	0.471405	0.406946	0.714384	0.461644	0.328798	0.299336	0.563093	0.131306	0.622841	0.392232	0.441726	0.687184	0.165205	0.282843	0.739183	0.745356	0.563093	0.620174	0.745356	0.860233	0.808608	0.566352	0.863911	0.69843	0.641179	0.527046	0.58722	0.243252	0.707107	0.883883	1.12318	0.618347	0.766965	1.12618	0.754474	0.515805
104	0.5	0.471405	0.325396	0.630286	0.292353	0.537484	0.561591	0.735215	0.223607	0.370117	0.406946	0.772368	0.461644	0.412231	0.299336	0.563093	0.149071	0.669534	0.424822	0.441726	0.666667	0.185695	0.447214	0.739183	0.894427	0.637377	0.620174	0.677834	0.862146	0.808608	0.566352	0.863911	0.563093	0.641179	0.527046	0.669534	0.243252	0.83205	0.780869	1.12318	0.727607	0.766965	1.0198	0.754474	0.515805
105	0.441726	0.471405	0.220863	0.630286	0.360555	0.585206	0.591969	0.897527	0.262613	0.392232	0.429783	0.765641	0.572598	0.447214	0.299336	0.563093	0.138675	0.572713	0.475277	0.509902	0.613572	0.209293	0.438529	0.739183	0.744208	0.780869	0.620174	0.745356	0.80468	0.677834	0.566352	0.780869	0.637377	0.632456	0.527046	0.745356	0.243252	0.824621	0.75	1.12318	0.537484	0.790569	1.0198	0.659768	0.5
106	0.441726	0.542326	0.220863	0.596795	0.360555	0.523424	0.591969	0.769309	0.262613	0.328798	0.4	0.761712	0.507371	0.515805	0.299336	0.69843	0.138675	0.507673	0.438529	0.588348	0.589256	0.228378	0.58722	0.675941	0.52791	0.662589	0.620174	0.761577	0.785359	0.565685	0.5	0.780869	0.69843	0.632456	0.527046	0.735215	0.34401	0.942809	0.727607	1.12318	0.537484	0.766965	0.905539	0.641179	0.5
107	0.5	0.571772	0.21693	0.596795	0.342997	0.403113	0.591969	0.832993	0.2	0.5	0.478913	0.759468	0.528059	0.515805	0.301178	0.69843	0.171499	0.650139	0.421998	0.588348	0.542326	0.229648	0.742781	0.675941	0.572598	0.662589	0.6	0.769309	0.785359	0.657596	0.5	0.849677	0.69843	0.527046	0.634648	0.735215	0.327777	0.685994	0.727607	1.12318	0.67873	1.14017	1	0.527046	0.488397
108	0.780869	0.438529	0.248069	0.641179	0.553066	0.382188	0.591969	0.728431	0.4	0.602355	0.49029	0.701047	0.5	0.306786	0.321911	0.572598	0.242536	0.413803	0.383482	0.588348	0.581238	0.229648	0.588348	0.739709	0.572598	0.349215	0.588348	0.769309	0.797537	0.588348	0.5	0.849528	0.69843	0.468165	0.634648	0.735215	0.326431	0.874475	0.727607	1.12318	0.581238	1	0.887954	0.596795	0.515805
109	0.588348	0.468521	0.248069	0.582623	0.519875	0.434372	0.591969	0.769309	0.395285	0.632456	0.49029	0.701047	0.507371	0.557086	0.332595	0.509902	0	0.511025	0.347258	0.588348	0.5	0.265085	0.632456	0.860233	0.5	0.349215	0.588348	0.769309	0.862146	0.620174	0.542326	0.849528	0.69843	0.468165	0.527046	0.669534	0.256074	0.824621	0.565685	0.943975	0.581238	0.901388	0.910642	0.760117	0.641179
110	0.526235	0.509902	0.220863	0.533494	0.511408	0.529999	0.651558	0.784465	0.333333	0.559017	0.383131	0.701047	0.507371	0.727607	0.332595	0.780869	0	0.485071	0.327499	0.632456	0.485071	0.191721	0.666667	0.923287	0.4	0.349215	0.784465	0.769309	0.862146	0.58722	0.5	0.859412	0.69843	0.468165	0.572598	0.787839	0.219265	0.824621	0.632456	0.917379	0.581238	0.901388	0.910642	0.923548	0.666667
111	0.473432	0.563093	0.181071	0.581238	0.438529	0.656532	0.521536	0.784465	0.5	0.438529	0.341743	0.72111	0.597022	0.563093	0.355563	0.780869	0	0.505964	0.347258	0.632456	0.485071	0.191721	0.687184	0.838274	0.441726	0.493865	0.808608	0.72111	0.862146	0.557086	0.441726	0.872172	0.637377	0.485071	0.632456	0.787839	0.219265	0.780869	0.632456	0.917379	0.581238	0.766965	0.910642	0.6895	0.642161
112	0.537484	0.72111	0.166091	0.537603	0.438529	0.656532	0.415227	0.745356	0.447214	0.404304	0.337778	0.72111	0.497519	0.349215	0.355563	0.766965	0	0.505964	0.395285	0.632456	0.626013	0.185695	0.677834	0.821995	0.5	0.69843	0.838274	0.686803	0.862146	0.808608	0.5	0.872172	0.75	0.5	0.632456	0.707107	0.219265	0.808608	0.632456	1.00778	0.581238	0.808608	1.04764	0.640184	0.60208
113	0.537484	0.637377	0.181071	0.505146	0.372678	0.790569	0.415227	0.745356	0.307148	0.410264	0.381181	0.766965	0.452679	0.72111	0.42357	0.666667	0.156174	0.505964	0.39968	0.537484	0.540495	0.248729	0.735215	0.905357	0.565685	0.707107	0.833333	0.700404	0.862146	0.557086	0.5547	0.872172	0.618347	0.542326	0.572598	0.669534	0.282843	0.780869	0.707107	0.353553	0.656532	0.808608	1.15045	0.581238	0.529999
114	0.441726	0.509902	0.286299	0.505146	0.372678	0.620174	0.415227	0.745356	0.537484	0.4	0.353553	0.766965	0.452679	0.72111	0.42357	0.666667	0	0.468165	0.427744	0.537484	0.632456	0.248729	0.838274	1	0.618347	0.640184	0.830455	0.566352	0.862146	0.485071	0.5547	0.876148	0.618347	0.54139	0.572598	0.669534	0.282843	0.746577	0.766965	0.353553	0.581238	0.808608	1.15045	0.640184	0.529999
115	0.5	0.5547	0.342997	0.550707	0.424918	0.5	0.38208	0.671729	0.421637	0.455321	0.366372	0.764706	0.362143	0.727607	0.42357	0.618347	0	0.468165	0.363803	0.632456	0.632456	0.248729	0.838274	0.819836	0.618347	0.543214	0.830455	0.566352	0.862146	0.485071	0.54139	0.876148	0.69843	0.566352	0.640184	0.618347	0.282843	0.746577	0.509902	0.383482	0.581238	0.742781	1.15045	0.69843	0.5
116	0.565685	0.5547	0.242536	0.536875	0.527046	0.47036	0.298398	0.671729	0.383482	0.455321	0.352332	0.766965	0.398015	0.727607	0.393475	0.543214	0.25	0.465361	0.377446	0.632456	0.632456	0.248729	0.849837	0.707107	0.210819	0.543214	0.806226	0.566352	0.84191	0.542326	0.566352	0.876148	0.69843	0.566352	0.746577	0.727607	0.268328	0.824621	0.461644	0.333333	0.581238	0.742781	1	0.542326	0.5
117	0.745356	0.5547	0.271163	0.581318	0.542326	0.542326	0.32249	0.784465	0.349215	0.535844	0.415227	0.705882	0.410264	0.857493	0.393475	0.6	0.242536	0.460086	0.391077	0.537484	0.584103	0.241144	0.728431	0.693375	0.210819	0.640184	0.72111	0.549442	0.914934	0.542326	0.5	0.859412	0.766965	0.700404	0.626013	0.848528	0.282843	0.824621	0.5	0.349215	0.581238	0.727607	1	0.687184	0.47036
118	0.632456	0.5547	0.261712	0.615385	0.438529	0.724286	0.4	0.784465	0.4	0.493197	0.415227	0.707107	0.507371	0.766965	0.429695	0.637377	0.2	0.460086	0.407596	0.666667	0.592749	0.248729	0.657596	0.6	0.333333	0.6	0.72111	0.583095	0.914934	0.392232	0.5	0.872172	0.830455	0.618347	0.626013	0.848528	0.282843	0.948683	0.563093	0.349215	0.581238	0.808608	1.07497	0.455321	0.428571
119	0.923548	0.572598	0.370117	0.671855	0.471405	0.694516	0.383482	0.584103	0.171499	0.498273	0.399114	0.748539	0.410264	0.790569	0.322585	0.632456	0	0.460086	0.347258	0.707107	0.559017	0.248729	0.821995	0.441726	0.310087	0.543214	1	0.583095	0.84191	0.392232	0.566352	0.872172	0.618347	0.737643	0.632456	0.948683	0.286299	0.905539	0.69843	0.220863	0.5	0.707107	1.07497	0.552158	0.399114
120	0.60208	0.572598	0.370117	0.754615	0.415227	0.640312	0.4	0.584103	0.333333	0.423451	0.339182	0.748539	0.398015	0.790569	0.322585	0.6	0.415227	0.4	0.313474	0.677834	0.559017	0.218322	0.821995	0.537484	0.424264	0.640184	1	0.583095	0.84191	0.371391	0.566352	0.808957	0.618347	0.835532	0.632456	0.948683	0.262613	0.6895	0.563093	0.220863	0.5	0.447214	1.07497	0.542326	0.460179
121	0.403113	0.5	0.370117	0.696568	0.438529	0.613572	0.6	0.515805	0.333333	0.442658	0.391077	0.798228	0.412311	0.790569	0.27735	0.632456	0.262613	0.370117	0.342997	0.493197	0.559017	0.219265	1	0.542326	0.438529	0.543214	1	0.583095	0.883452	0.557086	0.537484	0.808957	0.563093	0.830455	0.723241	0.874475	0.262613	0.6895	0.441726	0.220863	0.461644	0.570088	1.07497	0.618347	0.474045
122	0.27735	0.485071	0.523424	0.645169	0.471405	0.613572	0.555175	0.567646	0.220863	0.447214	0.460179	0.798228	0.412311	0.901388	0.287206	0.784465	0.342997	0.370117	0.28034	0.493197	0.559017	0.199224	1	0.537484	0.438529	0.543214	0.806226	0.583095	0.908153	0.557086	0.565685	0.808957	0.637377	0.955925	0.677834	0.806226	0.262613	0.727607	0.471405	0.220863	0.461644	0.656532	1.07497	0.618347	0.419137
123	0.349215	0.485071	0.473432	0.581318	0.511408	0.565685	0.434613	0.567646	0.349215	0.447214	0.399114	0.734726	0.412311	0.901388	0.311515	1.0198	0.171499	0.34401	0.276533	0.519875	0.559017	0.224363	1	0.588348	0.438529	0.461644	0.707107	0.583095	0.908153	0.58722	0.666667	0.808957	0.75	0.955925	0.677834	0.669534	0.317162	0.707107	0.471405	0.176777	0.461644	0.857493	1.12618	0.618347	0.419137
124	0.349215	0.542326	0.473432	0.478852	0.5547	0.522976	0.434613	0.666667	0.471405	0.328798	0.474045	0.800995	0.398015	0.874475	0.311515	0.838274	0.185695	0.468521	0.330859	0.527046	0.54139	0.231535	0.946864	0.588348	0.384111	0.543214	0.707107	0.632456	0.908153	0.58722	0.447214	0.811396	0.75	0.928477	0.677834	0.669534	0.306786	0.77169	0.537484	0.176777	0.509902	0.857493	1.12618	0.618347	0.419137
125	0.571772	0.542326	0.371391	0.585206	0.392232	0.5	0.428746	0.666667	0.570088	0.338917	0.413449	0.800995	0.444444	0.83205	0.311515	0.83205	0	0.465361	0.304388	0.527046	0.566352	0.267889	1	0.662589	0.565685	0.543214	0.790569	0.638877	0.908153	0.474342	0.395285	0.811396	0.790569	0.798706	0.677834	0.537484	0.306786	0.780869	0.666667	0.176777	0.509902	0.857493	1.12618	0.632456	0.419137
126	0.707107	0.485071	0.371391	0.544059	0.393919	0.524564	0.4	0.617611	0.666667	0.367607	0.333333	0.748539	0.441726	0.727607	0.323201	0.83205	0.262613	0.461774	0.327011	0.620174	0.447214	0.226224	1	0.588348	0.583095	0.543214	1.1767	0.714286	0.908153	0.657596	0.353553	0.811396	0.901388	0.798706	0.677834	0.58722	0.306786	0.808901	0.537484	0.176777	0.451754	0.857493	1.04611	0.515388	0.5
127	0.6	0.485071	0.371391	0.478852	0.415227	0.532152	0.370117	0.617611	0.537484	0.410997	0.333333	0.751134	0.552158	0.662589	0.309173	0.83205	0.242536	0.429783	0.316656	0.620174	0.565685	0.256799	0.946864	0.632456	0.588348	0.543214	1.14017	0.515079	0.840348	0.565685	0.447214	0.808957	1	0.656532	0.677834	0.618347	0.242536	0.808901	0.421637	0.5	0.485071	0.857493	1.13529	0.458123	0.5
128	0.310087	0.485071	0.371391	0.485457	0.447214	0.505076	0.414243	0.517727	0.473432	0.380143	0.413449	0.810918	0.552158	0.727607	0.358012	0.83205	0.242536	0.429783	0.26029	0.669534	0.383482	0.256799	0.946864	0.620174	0.461644	0.543214	1.14017	0.515079	0.818598	0.625	0.707107	0.808957	0.8	0.700404	0.746577	0.857493	0.262613	0.790569	0.333333	0.5	0.527046	0.727607	1.13529	0.458123	0.460179
129	0.307148	0.5	0.331042	0.606339	0.383482	0.589015	0.399043	0.618347	0.421998	0.415227	0.434372	0.822108	0.5	0.707107	0.311515	0.83205	0.149071	0.401386	0.223607	0.669534	0.468165	0.241144	0.838274	0.620174	0.461644	0.543214	1.14017	0.583095	0.901388	0.625	0.662589	0.808957	0.8	0.754474	0.746577	0.857493	0.286299	0.790569	0.185695	0.441726	0.527046	0.727607	1	0.493865	0.460179
130	0.2	0.471405	0.473432	0.606339	0.383482	0.632456	0.428746	0.761577	0.473432	0.415227	0.406138	0.817889	0.6	0.570088	0.331679	0.83205	0.149071	0.401386	0.242536	0.669534	0.485071	0.234003	0.808608	0.620174	0.527046	0.543214	1.14017	0.583095	0.901388	0.563093	0.637377	0.75	0.685994	0.780869	0.746577	0.857493	0.310087	0.760345	0.141421	0.441726	0.485071	0.857493	1	0.493865	0.5
131	0	0.471405	0.447214	0.606339	0.371391	0.527046	0.5	0.769309	0.473432	0.419137	0.382821	0.759468	0.6	0.570088	0.333333	0.787839	0	0.434613	0.242536	0.618347	0.496139	0.256472	0.808608	0.857493	0.527046	0.543214	0.790569	0.583095	0.838274	0.563093	0.447214	0.740233	0.685994	0.666667	0.746577	0.824621	0.380058	0.707107	0.156174	0.349215	0.485071	0.766965	1	0.493865	0.424918
132	0	0.523424	0.447214	0.503413	0.371391	0.461644	0.428746	0.894427	0.473432	0.412231	0.394922	0.759468	0.605257	0.438529	0.345726	0.662589	0.185695	0.401386	0.242536	0.618347	0.667947	0.283176	0.766965	0.707107	0.652863	0.543214	0.790569	0.583095	0.838274	0.632456	0.5	0.740233	0.707107	0.883883	0.858898	0.824621	0.421998	0.707107	0.312348	0.441726	0.424918	0.707107	1	0.493865	0.461644
133	0.2	0.58722	0.526235	0.462464	0.384111	0.468521	0.46225	0.739709	0.473432	0.333333	0.428353	0.759468	0.555556	1	0.345726	0.662589	0	0.441726	0.292052	0.618347	0.606339	0.273954	0.874475	0.614636	0.592749	0.543214	0.790569	0.515388	0.919018	0.632456	0.395285	0.740233	0.53033	0.780869	0.735215	0.824621	0.5	0.707107	0.383482	0.349215	0.382188	0.669534	0.910642	0.493865	0.461644
134	0.2	0.666667	0.640184	0.462464	0.404888	0.441726	0.539072	0.707107	0.656532	0.34401	0.5	0.755295	0.555556	0.901388	0.358012	0.727607	0	0.441726	0.331042	0.618347	0.662085	0.241144	1	0.447214	0.479301	0.543214	0.790569	0.410264	0.919018	0.584103	0.349215	0.72111	0.6	0.910642	0.735215	0.824621	0.727607	0.677834	0.383482	0.447214	0.6	0.787839	0.910642	0.584103	0.461644
135	0.27735	0.700404	0.632456	0.618347	0.404888	0.392232	0.539072	0.6895	0.473432	0.366088	0.482573	0.747322	0.555556	1	0.351448	0.780869	0	0.38208	0.34001	0.662589	0.640312	0.268732	1	0.549442	0.479301	0.5	0.766965	0.333333	0.903877	0.653047	0.441726	0.72111	0.58722	1	0.735215	0.894427	0.662589	0.677834	0.342997	0.447214	0.707107	0.787839	1.03078	0.594692	0.461644
136	0.54139	0.700404	0.632456	0.589256	0.468521	0.447214	0.5	0.948683	0.5	0.317162	0.460977	0.70473	0.553066	1	0.339746	0.780869	0	0.39148	0.296374	0.662589	0.650139	0.248729	0.784465	0.677834	0.479301	0.509902	0.877058	0.351364	0.903877	0.653047	0.441726	0.72111	0.557086	1.23466	0.735215	1.05612	0.662589	0.677834	0.519875	0.583095	0.697486	0.928477	1.13192	0.594692	0.519875
137	0.571772	0.669534	0.52791	0.671855	0.514496	0.460977	0.5	0.897527	0.5	0.370117	0.567646	0.70473	0.5	0.559017	0.284183	0.640184	0	0.353553	0.313006	0.662589	0.715891	0.232495	0.666667	0.687184	0.479301	0.509902	0.830455	0.331295	0.919018	0.653047	0.563093	0.72111	0.542326	0.910642	0.677834	1.05612	0.662589	0.677834	0.333333	0.643921	0.697486	0.787839	1.13192	0.594692	0.519875
138	0.333333	0.54139	0.583095	0.671855	0.514496	0.460977	0.447214	0.932123	0.5	0.370117	0.580201	0.70473	0.404304	0.438529	0.29432	0.693375	0	0.440415	0.302461	0.662589	0.715891	0.232495	0.766965	0.677834	0.52791	0.509902	0.830455	0.331295	0.919018	0.653047	0.4	0.72111	0.632456	0.808901	0.626013	0.946864	0.662589	0.72111	0.372678	0.69843	0.592749	0.632456	1.13192	0.594692	0.570088
139	0.223607	0.511408	0.52791	0.671855	0.493865	0.651153	0.447214	1.00957	0.447214	0.384615	0.580201	0.70473	0.404304	0.707107	0.293759	0.637377	0	0.473432	0.327499	0.780869	0.715891	0.232495	0.806226	0.677834	0.485913	0.563093	0.830455	0.325396	0.838002	0.653047	0.333333	0.72111	0.824621	0.790569	0.626013	0.838274	0.662589	0.700404	0.2	0.780869	0.592749	0.58722	1.13192	0.594692	0.570088
140	0.447214	0.511408	0.52791	0.620174	0.404888	0.614295	0.539072	1	0.473432	0.32596	0.583095	0.70473	0.410264	0.447214	0.293759	0.637377	0	0.512768	0.300421	0.883883	0.785136	0.232495	0.707107	0.72111	0.471405	0.441726	0.857493	0.333333	0.838002	0.813489	0.5	0.72111	0.824621	0.790569	0.735215	0.860233	0.662589	0.806226	0.242536	1	0.592749	0.707107	1.13192	0.594692	0.570088
141	0.707107	0.54139	0.52791	0.620174	0.404888	0.614295	0.54853	0.765641	0.392232	0.256307	0.52791	0.720777	0.410264	0.25	0.265455	0.790569	0.196116	0.485071	0.242536	0.780869	0.65192	0.247353	0.707107	0.6	0.447214	0.441726	0.857493	0.21693	0.838002	0.813489	0.5	0.782304	0.790569	0.637377	0.735215	0.849837	0.780869	0.806226	0.447214	1	0.592749	0.620174	1.10431	0.594692	0.460977
142	0.392232	0.54139	0.485913	0.634324	0.404888	0.523053	0.54853	0.800943	0.392232	0.256307	0.48956	0.686803	0.410264	0.2	0.265455	0.883883	0.196116	0.4287	0.212091	0.69843	0.682461	0.228378	0.693375	0.6	0.447214	0.441726	0.830455	0.21693	0.838002	0.813489	0.707107	0.782304	0.894427	0.625	0.626013	0.838274	0.707107	0.677834	0.235702	1	0.592749	0.620174	1.10431	0.563093	0.566352
143	0.415227	0.549442	0.592749	0.657231	0.527046	0.481664	0.54853	0.800943	0.310087	0.256307	0.48956	0.599092	0.563093	0.2	0.250846	0.883883	0.282843	0.328798	0.327561	0.637377	0.682461	0.209293	0.685994	0.657596	0.571772	0.441726	0.830455	0.21693	0.838002	0.785136	0.669534	0.724503	0.849837	0.75	0.626013	1	0.707107	0.700404	0.372678	1	0.592749	0.687184	1.10431	0.535844	0.565685
144	0.262613	0.606339	0.592749	0.634324	0.424918	0.481664	0.54853	1	0.421637	0.357771	0.565685	0.605257	0.563093	0.485071	0.250846	0.75	0.282843	0.328798	0.327561	0.637377	0.806226	0.202789	0.447214	0.588348	0.571772	0.4	0.830455	0.242536	0.838002	0.707107	0.686803	0.724503	0.666667	0.632456	0.644772	0.765641	0.69843	0.618347	0.4	0.653047	0.677834	0.687184	1.10431	0.535844	0.566352
145	0.883883	0.606339	0.620174	0.634324	0.372678	0.460086	0.632456	0.894427	0.421637	0.404888	0.535844	0.651107	0.563093	0.557086	0.250846	0.5547	0.196116	0.328798	0.270114	0.637377	0.732177	0.2371	0.53033	0.588348	0.571772	0.4	0.766965	0.331042	0.838002	0.707107	0.632456	0.72111	0.632456	0.632456	0.644772	0.765641	0.572598	0.72111	0.557086	0.653047	0.687184	0.687184	0.980581	0.507371	0.606339
146	1.41421	0.606339	0.620174	0.634324	0.447214	0.435365	0.632456	0.873212	0.415227	0.415227	0.563093	0.651107	0.563093	0.415227	0.258863	0.5	0.196116	0.358979	0.321911	0.637377	0.732177	0.256799	0.383482	0.784465	0.493865	0.441726	0.72111	0.158114	0.850026	0.760117	0.632456	0.72111	0.527046	0.632456	0.644772	0.765641	0.592749	0.72111	0.537484	0.60208	0.589015	0.877058	1	0.497519	0.659768
147	0.921954	0.474342	0.744208	0.696568	0.372678	0.371391	0.542326	0.986394	0.415227	0.371391	0.671729	0.685283	0.544059	0.58722	0.267408	0.571772	0.196116	0.358979	0.296788	0.563093	0.681115	0.2371	0.557086	0.784465	0.572598	0.563093	0.72111	0.196116	0.924928	0.732177	0.493197	0.724503	0.527046	0.620174	0.644772	0.806226	0.540495	0.72111	0.493865	0.630286	0.589015	0.707107	0.946864	0.497519	0.606339
148	0.588348	0.54139	0.798706	0.671855	0.506594	0.570826	0.505076	1	0.473432	0.343592	0.773021	0.703598	0.544059	0.58722	0.276533	0.728869	0.185695	0.358979	0.317162	0.563093	0.732177	0.2371	0.471405	0.784465	0.572598	0.563093	0.766965	0.395285	0.924928	0.707107	0.493197	0.78296	0.565685	0.675863	0.644772	0.806226	0.540495	0.72111	0.4	0.630286	0.589015	0.980581	0.943616	0.6	0.606339
149	0.766965	0.54139	0.776493	0.671855	0.485071	0.592749	0.542326	1.01379	0.473432	0.415227	0.780869	0.703598	0.5	0.415227	0.242536	0.571772	0	0.358979	0.252982	0.563093	0.622841	0.248729	0.474342	0.727607	0.687184	0.441726	0.766965	0.415227	0.989813	0.707107	0.493197	0.765641	0.565685	0.675863	0.644772	0.72111	0.511408	0.72111	0.72111	0.471405	0.638877	0.72111	0.943616	0.608276	0.606339
150	0.921954	0.54139	0.707107	0.684811	0.485071	0.299813	0.589015	1	0.58722	0.452679	0.696526	0.717361	0.5	0.342997	0.242536	0.746788	0	0.358979	0.2	0.69843	0.707107	0.248729	0.566352	0.808608	0.652863	0.4	1	0.525226	0.987927	0.614636	0.566352	0.705751	0.5	0.675863	0.644772	1	0.496139	0.72111	1.07703	0.482573	0.638877	0.72111	0.970143	0.608276	0.686803
151	0.5	0.566352	0.694516	0.60458	0.342997	0.493197	0.584103	1	0.54139	0.685994	0.596464	0.729923	0.493197	0.353553	0.233603	0.667947	0	0.304604	0.28748	0.69843	0.707107	0.256799	0.584103	0.824621	0.572598	0.4	1	0.441726	0.898888	0.682461	0.434372	0.705751	0.727607	0.671729	0.592749	1	0.656532	0.614295	0.838274	0.482573	0.638877	0.72111	0.877058	0.608276	0.760117
152	1.05045	0.566352	0.630286	0.60458	0.391077	0.519875	0.527046	0.819836	0.370117	0.526235	0.5	0.736908	0.493197	0.519875	0.233603	0.667947	0	0.304604	0.211079	0.69843	0.785136	0.225189	0.511408	0.687184	0.52791	0.441726	1	0.5	0.898888	0.682461	0.367607	0.692046	0.727607	0.563093	0.592749	1	0.835532	0.614295	0.838274	0.495261	0.638877	0.72111	0.837808	0.608276	0.760117
153	0.447214	0.565685	0.60208	0.60458	0.424918	0.496139	0.391077	0.840771	0.370117	0.345349	0.460977	0.685027	0.419137	0.527046	0.23281	0.6895	0.223607	0.304604	0.2	0.69843	0.765641	0.155043	0.447214	0.588348	0.52791	0.563093	1	0.563093	0.898888	0.707107	0.328798	0.767869	0.542326	0.653047	0.626013	1	0.894427	0.614295	0.824621	0.542326	0.638877	0.637377	0.930261	0.608276	0.760117
154	0.557086	0.451754	0.851469	0.632456	0.391077	0.5547	0.403113	0.843996	0.370117	0.332182	0.468165	0.685027	0.5	0.223607	0.18471	0.6895	0.223607	0.296319	0.2	0.69843	0.739709	0.187037	0.415227	0.632456	0.583095	0.493865	1	0.441726	0.898888	0.707107	0.707107	0.838274	0.447214	1.17361	0.572598	1	0.739709	0.58722	0.824621	0.542326	0.5547	0.790569	1.02899	0.550707	0.760117
155	0.5	0.451754	0.707107	0.727607	0.451754	0.519875	0.474342	0.874475	0.415227	0.342405	0.468165	0.685027	0.544059	0.316228	0.209772	0.626013	0	0.395092	0.2	0.69843	0.739709	0.187037	0.438529	0.685994	0.572598	0.493865	1	0.563093	0.898888	0.843996	0.657596	0.803882	0.707107	0.88083	0.572598	0.808608	0.630286	0.5	0.687184	0.542326	0.5547	0.728869	0.926727	0.550707	0.666667
156	0.316228	0.519875	0.620174	0.707107	0.428571	0.519875	0.585206	0.874475	0.333333	0.342405	0.669534	0.670402	0.544059	0.328798	0.222497	0.667947	0	0.407189	0.135457	0.5547	0.739709	0.198552	0.5	0.632456	0.404888	0.52791	0.75	0.563093	0.898888	0.843996	0.657596	0.787343	0.849837	0.835532	0.52791	0.746577	0.667947	0.5	0.485071	0.437237	0.5547	0.707107	0.926727	0.550707	0.614636
157	0.874475	0.583095	0.761577	0.65192	0.391077	0.519875	0.632456	0.977692	0.415227	0.342405	0.700404	0.632456	0.45607	0.372678	0.209772	0.667947	0.196116	0.399043	0.166667	0.667947	0.630286	0.203917	0.447214	0.766965	0.461644	0.52791	0.874475	0.563093	0.838274	0.806226	0.677834	0.787343	0.745356	0.835532	0.52791	0.746577	0.632456	0.493197	0.447214	0.437237	0.511408	0.624695	0.926727	0.444444	0.542326
158	0.570088	0.583095	0.6895	0.561591	0.424918	0.479301	0.715891	0.874475	0.392232	0.412231	0.485071	0.632456	0.45607	0.565685	0.194605	0.830455	0	0.356915	0.108786	0.746788	0.630286	0.225189	0.72111	0.588348	0.447214	0.527046	1.02899	0.662589	0.838274	0.732177	0.677834	0.787343	0.849837	0.835532	0.652863	0.746577	0.638877	0.363803	0.4	0.437237	0.728431	0.780869	0.926727	0.507371	0.614636
159	0.5	0.589015	0.746577	0.561591	0.543214	0.527046	0.682461	0.841021	0.392232	0.362143	0.274721	0.779428	0.45607	0.372678	0.20234	0.830455	0.185695	0.438529	0.120824	0.746788	0.618347	0.225189	0.72111	0.588348	0.404888	0.424918	0.808608	0.780869	0.91214	0.818598	0.583095	0.787343	0.806226	0.798706	0.652863	0.588348	0.570088	0.5	0.559017	0.542326	0.637377	0.614636	0.837808	0.5	0.614636
160	0.282843	0.515388	0.667947	0.437237	0.543214	0.572598	0.682461	0.740797	0.392232	0.298511	0.29361	0.682981	0.45607	0.372678	0.1934	0.877058	0	0.392232	0.27735	0.620174	0.630286	0.225189	0.637377	0.588348	0.461644	0.404888	0.980581	0.69843	0.91214	0.818598	0.583095	0.787343	0.632456	0.798706	0.6895	0.588348	0.60208	0.5	0.685994	0.523424	0.637377	0.614636	0.837808	0.528059	0.471405
161	0.632456	0.515388	0.620174	0.405499	0.461644	0.572598	0.682461	0.740797	0.473432	0.314658	0.383482	0.657596	0.629317	0.282843	0.1934	0.877058	0	0.392232	0.27735	0.693375	0.666667	0.225189	0.637377	0.588348	0.572598	0.404888	0.980581	0.780869	0.91214	0.818598	0.65192	0.817492	0.542326	0.906765	0.626013	0.632456	0.677834	0.625	0.808608	0.523424	0.637377	0.537484	0.837808	0.528059	0.5
162	0.5	0.5547	0.707107	0.5	0.461644	0.632456	0.715891	0.740797	0.58722	0.404304	0.333333	0.57876	0.724398	0.282843	0.209772	0.902986	0	0.349215	0.241649	0.693375	0.620174	0.231125	0.637377	0.620174	0.52791	0.404888	0.980581	0.780869	0.91214	0.830455	0.542326	0.804778	0.620174	0.798706	0.626013	0.666667	0.723241	0.632456	0.784465	0.630286	0.637377	0.537484	0.837808	0.528059	0.5
163	0.485071	0.559017	0.724286	0.467269	0.5	0.537484	0.67873	0.841021	0.656532	0.428353	0.342997	0.660534	0.724398	0.27735	0.203069	0.813941	0	0.4287	0.45607	0.693375	0.620174	0.231125	0.637377	0.666667	0.52791	0.438529	0.980581	0.693375	0.91214	0.707107	0.542326	0.734025	0.707107	0.700404	0.735215	0.745356	0.723241	0.637377	0.806226	0.630286	0.637377	0.537484	0.926727	0.515805	0.581238
164	0.242536	0.455321	0.724286	0.467269	0.493197	0.666667	0.640312	0.826047	0.632456	0.294174	0.471405	0.660534	0.629317	0.2	0.203069	0.790569	0	0.4287	0.444994	0.693375	0.605783	0.223943	0.632456	0.657596	0.52791	0.438529	0.980581	0.461644	0.919018	0.707107	0.537484	0.765641	0.707107	0.739709	0.707107	0.693375	0.677834	0.760345	0.588348	0.630286	0.589015	0.666667	0.926727	0.567646	0.5
165	0.25	0.584103	0.640184	0.438529	0.419137	0.666667	0.613572	0.657794	0.632456	0.282843	0.482573	0.633037	0.519875	0.727607	0.209772	0.717958	0.164399	0.4287	0.444994	0.572598	0.666667	0.223943	0.58722	0.632456	0.52791	0.542326	0.838274	0.5	0.919018	0.707107	0.421637	0.692046	0.707107	0.653047	0.707107	0.666667	0.677834	0.760345	0.588348	0.630286	0.589015	0.69843	0.908674	0.567646	0.745356
166	0.25	0.673146	0.543214	0.438529	0.382188	0.707107	0.657596	0.690698	0.5	0.392232	0.418638	0.652863	0.519875	0.727607	0.233635	0.632456	0	0.447214	0.358766	0.571772	0.666667	0.223943	0.742781	0.790569	0.583095	0.632456	0.851469	0.461644	0.987927	0.707107	0.421637	0.747922	0.707107	0.707107	0.735215	0.565685	0.589256	0.760345	0.588348	0.630286	0.583095	0.666667	0.930261	0.553066	0.509902
167	0.164399	0.673146	0.543214	0.436648	0.403113	0.707107	0.701646	0.707107	0.5	0.428353	0.650139	0.666667	0.519875	0.727607	0.251101	0.632456	0.196116	0.381998	0.552158	0.571772	0.666667	0.223943	0.72111	0.874475	0.572598	0.614636	0.851469	0.419137	0.985471	0.707107	0.421637	0.764199	0.632456	0.707107	0.735215	0.565685	0.589256	0.813489	0.588348	0.653047	0.451754	0.707107	0.930261	0.553066	0.563093
168	0.164399	0.667947	0.6	0.436648	0.372104	0.707107		0.782154	0.493865	0.421998	0.65192	0.720777	0.519875	0.790569	0.248859	0.707107	0.262613	0.381998	0.737643	0.493865	0.707107	0.223943	0.666667	0.806226	0.404888	0.614636	0.851469	0.419137	0.985471	0.707107	0.421637	0.753966	0.632456	0.765641	0.670402	0.613572	0.589256	0.813489	0.620174	0.653047	0.451754	0.707107	0.930261	0.507371	0.542326
169	0.166667	0.790569	0.588348	0.441081	0.464238	0.392232		0.662085	0.563093	0.434613	0.60208	0.731119	0.5	0.766965	0.255704	0.760117	0.262613	0.359908	0.675863	0.493865	0.666667	0.255286	0.806226	0.707107	0.404888	0.614636	0.677834	0.460179	1	0.618347	0.618347	0.691333	0.637377	0.707107	0.670402	0.626013	0.640184	0.843996	0	0.653047	0.451754	0.614295	0.930261	0.5	0.65192
170	0.235702	0.727607	0.588348	0.427482	0.447214	0.58722		0.749429	0.582772	0.219265	0.54139	0.778818	0.5	0.588348	0.232911	0.760117	0.185695	0.359908	0.868243	0.493865	0.666667	0.248729	0.806226	0.620174	0.404888	0.614636	0.592749	0.428571	0.901044	0.700404	0.485071	0.724503	0.808608	0.707107	0.697486	0.6895	0.640184	0.785136	0.316228	0.653047	0.451754	0.739709	0.930261	0.333333	0.65192
171	0.235702	0.802773	0.565685	0.427482	0.526235	0.723241		0.840771	0.391077	0.153393	0.54139	0.778818	0.5	0.4	0.252599	0.707107	0.185695	0.359908	1.01015	0.571772	0.707107	0.209293	0.542326	0.438529	0.404888	0.614636	0.537484	0.428571	1	0.739709	0.485071	0.734452	0.824621	0.723241	0.635999	0.527046	0.589256	0.707107	0.25	0.653047	0.370117	0.760117	0.877058	0.383482	0.65192
172	0.121268	0.707107	0.5	0.4	0.588348	0.677834		0.943616	0.306786	0.246932	0.482573	0.778818	0.544059	0.942809	0.222497	0.760117	0.185695	0.359908	0.883883	0.571772	0.785136	0.209293	0.632456	0.666667	0.404888	0.537484	0.537484	0.333333	1	0.739709	0.485071	0.717043	0.874475	0.723241	0.644772	0.589256	0.589256	0.707107	0	0.653047	0.370117	0.760117	0.877058	0.383482	0.65192
173	0.171499	0.685994	0.416025	0.4	0.588348	0.746577		0.943616	0.342997	0.222497	0.482573	0.787912	0.565685	0.559017	0.244528	0.806226	0.185695	0.372678	0.971286	0.624695	0.785136	0.180151	1	0.525226	0.404888	0.537484	0.632456	0.362143	1	0.707107	0.485071	0.724491	0.806226	0.723241	0.749532	0.620174	0.589256	0.715891	0	0.653047	0.482573	0.643921	0.837808	0.584103	0.666667
174	0.202031	0.667947	0.542326	0.374828	0.588348	0.640184		0.707107	0.353553	0.282843	0.434613	0.767621	0.5	0.353553	0.244528	0.700404	0	0.372678	0.787839	0.624695	0.666667	0.180151	0.849837	0.447214	0.52791	0.537484	0.525226	0.362143	1.14017	0.806226	0.383482	0.734025	0.72111	0.677834	0.741999	0.563093	0.589256	0.707107	0.5	0.653047	0.482573	0.493865	0.877058	0.594692	0.666667
175	0.527046	0.667947	0.685994	0.374828	0.588348	0.640184		0.785136	0.370117	0.202444	0.460977	0.744348	0.5	0.559017	0.252599	0.700404	0	0.316228	1.05409	0.624695	0.666667	0.154377	0.72111	0.727607	0.404888	0.537484	0.525226	0.392232	1.13192	0.632456	0.383482	0.734025	0.780869	0.640184	0.635999	0.563093	0.589256	0.707107	0.5	0.653047	0.5547	0.493865	0.826047	0.455321	0.54139
176	0.519875	0.728431	0.685994	0.506897	0.572598	0.877058		0.727607	0.392232	0.220863	0.537484	0.815933	0.588562	0.559017	0.241466	0.566352	0	0.287348	0.98773	0.468521	0.666667	0.203917	0.894427	0.727607	0.447214	0.5	0.830455	0.471405	1.10744	0.8	0.415227	0.780869	0.808608	0.640184	0.67082	0.563093	0.5	0.630286	0.707107	0.707107	0.5547	0.424264	0.926727	0.455321	0.596795
177	0.395285	0.728431	0.643921	0.506897	0.519875	0.667947		0.727607	0.29361	0.333333	0.482573	0.893121	0.588562	0.282843	0.21693	0.566352	0.158114	0.287348	0.951972	0.571772	0.641179	0.216218	0.921954	0.447214	0.509902	0.353553	0.806226	0.471405	1	1	0.415227	0.843917	0.83205	0.640184	0.635999	0.563093	0.27735	0.60208	0.707107	0.707107	0.5547	0.424264	0.926727	0.455321	0.537484
178	0.310087	0.728431	0.349215	0.536875	0.543214	0.653047		0.572598	0.29361	0.310087	0.468165	0.882162	0.588562	0.328798	0.21693	0.566352	0.158114	0.287348	0.883883	0.571772	0.582623	0.216218	1	0.557086	0.509902	0.421637	0.806226	0.537484	0.883883	0.961769	0.58722	0.843917	0.802773	0.640184	0.581238	0.620174	0.27735	0.620174	0.901388	0.776493	0.449719	0.424264	0.943527	0.455321	0.537484
179	0.4	0.728431	0.383482	0.536875	0.620174	0.883883		0.65911	0.388514	0.302891	0.468165	0.826192	0.598421	0.282843	0.248511	0.618347	0.158114	0.287348	0.511408	0.707107	0.641179	0.207854	1	0.557086	0.447214	0.421637	0.72111	0.421998	1	0.955925	0.434372	0.926727	0.942809	0.620174	0.821995	0.669534	0.527046	0.693375	0.901388	0.749429	0.529999	0.424264	1.01813	0.5	0.537484
180	0.4	0.72111	0.171499	0.503793	0.669534	0.780869		0.65911	0.370117	0.410264	0.540495	0.790569	0.598421	0.282843	0.239426	0.618347	0.158114	0.244199	0.632456	0.693375	0.666667	0.207854	1.24035	0.588348	0.447214	0.421637	0.72111	0.474342	1.01015	0.830455	0.566352	0.900617	0.830455	0.693375	0.600925	0.707107	0.5	0.72111	0.559017	0.749429	0.570826	0.424264	1.01813	0.447214	0.553066
