# Supplementary material for: Wnt- and glutamate-receptors orchestrate stem cell dynamics and asymmetric cell division
Source: eLife. 2021 May 24;10:e59791. doi: 10.7554/eLife.59791 (PMC8177892; doi:10.7554/eLife.59791)
Supplement: Figure 7—source data 1. [file elife-59791-fig7-data1.xlsx]

## Sheet: Figure 7
Panel A and B
time (min)	WT + Wnt3a beads (repeated from Fig.4)	GriK1/3dKO #1	GriK1/3dKO #2	GriA3/4dKO #1	GriA3/4dKO #2			WT + Wnt3a beads (repeated from Fig.4)			GriK1/3dKO #1			GriK1/3dKO #2			GriA3/4dKO #1			GriA3/4dKO #2					Two-way ANOVA	Ordinary						Number of families	3
1	0.905831	0.935594	1.04561	0.986296	1.04181		Track #	Average 1-30	Average 31-120 min	Average 121-180 min	Average 1-30	Average 31-120 min	Average 121-180 min	Average 1-30	Average 31-120 min	Average 121-180 min	Average 1-30	Average 31-120 min	Average 121-180 min	Average 1-30	Average 31-120 min	Average 121-180 min			Alpha	0.05						Number of comparisons per family	2
2	0.837205	0.895793	0.933775	0.942648	0.992857		1	1.20441	0.739156	0.705452	0.623212	0.519913	0.435276	0.778421	0.826223	0.704132	0.696976	0.524267	0.553364	0.73166	0.541677	0.60345										Alpha	0.05
3	0.805732	0.861199	0.840531	0.921283	0.917878		2				0.854119	0.543323	0.586239	0.529221	0.587297	0.622756	0.633251	0.480208		0.73091	0.614648	0.642892			Source of Variation	% of total variation	P value	P value summary	Significant?
4	0.773411	0.801193	0.783311	0.86186	0.861176		3	0.868412	0.353938	0.342944	0.727401	0.468988	0.571396	0.615613	0.500371	0.622624	0.577225	0.533668	0.679323	0.710247	0.779386	0.589418			Interaction	2.626	0.0133	*	Yes			Dunnett's multiple comparisons test	Predicted (LS) mean diff.	95.00% CI of diff.	Below threshold?	Summary	Adjusted P Value		Test details	Predicted (LS) mean 1	Predicted (LS) mean 2	Predicted (LS) mean diff.	SE of diff.	N1	N2	q	DF
5	0.773857	0.784377	0.773894	0.83884	0.851868		4	0.815645	0.425246	0.202726	0.477624	0.506344	0.554111	0.644886	0.446811	0.616946	0.609143	0.565353		0.683853	0.690551	0.677121			Row Factor	9.84	<0.0001	****	Yes
6	0.770461	0.762158	0.746103	0.794651	0.793351		5	0.93898	0.683067	0.442621	0.530339	0.480126	0.461632	0.697855	0.556057	0.74742	0.560399	0.278086	0.288765	0.855912	0.925876	0.737594			Column Factor	2.802	0.0012	**	Yes			0-30 min
7	0.757193	0.724851	0.744931	0.769003	0.756954		6	0.70502	0.554622	0.525346	0.85162	0.576047	0.567095	0.608873	0.577287	0.509549	0.645462	0.716107	0.499939	0.766433	0.89446	0.825428										WT vs. GriK1/3dKO (#1)	0.004305	-0.07061 to 0.07922	No	ns	0.9881		WT vs. GriK1/3dKO (#1)	0.7013	0.697	0.004305	0.03376	46	45	0.1275	414
8	0.738409	0.710456	0.722132	0.74989	0.749009		7	0.697953	0.564574	0.517795	0.600605	0.43589	0.539874	0.589116	0.676183	0.722945	0.785156	0.661423	0.663461	0.794922	0.655065	0.60365			ANOVA table	SS (Type III)	DF	MS	F (DFn, DFd)	P value		WT vs. GriK1/3dKO (#2)	0.02164	-0.05135 to 0.09464	No	ns	0.7338		WT vs. GriK1/3dKO (#2)	0.7013	0.6797	0.02164	0.0329	46	50	0.6579	414
9	0.722453	0.719898	0.696253	0.741764	0.732397		8	0.724425	0.256392	0.458611	0.670067	0.737474	0.791539	0.77244	0.704287	0.594181	0.823741	0.833387	0.604559	0.884564	0.725493	0.709607			Interaction	0.3315	4	0.08288	F (4, 414) = 3.197	P=0.0133
10	0.719269	0.689276	0.656457	0.745106	0.706941		9	0.848954	0.696803	0.524152	0.493049	0.592948	0.448464	0.50413	0.634094	0.535218	0.554477	0.528369	0.365518	0.957552	0.622867	0.591352			Row Factor	1.242	2	0.6211	F (2, 414) = 23.95	P<0.0001		31-120 min
11	0.70246	0.68624	0.64196	0.736834	0.673431		10	0.599341	0.431608	0.682569	0.367032	0.478015	0.357711	0.902322	0.416521	0.921086	0.639417	0.540399	0.541638	0.83902	0.613606	0.514325			Column Factor	0.3536	2	0.1768	F (2, 414) = 6.820	P=0.0012		WT vs. GriK1/3dKO (#1)	-0.05695	-0.1319 to 0.01796	No	ns	0.1624		WT vs. GriK1/3dKO (#1)	0.5306	0.5876	-0.05695	0.03376	46	45	1.687	414
12	0.695907	0.691849	0.64265	0.719757	0.649569		11	0.811145	0.839852	0.802988	0.544032	0.444129	0.496786	0.601989	0.73557	0.753849	0.540484	0.481658	0.721526	0.617977	0.560874	0.569048			Residual	10.73	414	0.02593				WT vs. GriK1/3dKO (#2)	-0.08953	-0.1625 to -0.01654	Yes	*	0.0129		WT vs. GriK1/3dKO (#2)	0.5306	0.6202	-0.08953	0.0329	46	50	2.722	414
13	0.700916	0.679638	0.643795	0.693165	0.644252		12				0.732354	0.768919	0.727304	0.61595	0.584936	0.692028	0.822774	0.821517	0.767026	0.610834	0.615148	0.584488
14	0.679227	0.648746	0.644959	0.631764	0.662117		13	0.694998	0.70686	0.794401	0.569446	0.377762	0.520124	0.642896	0.478401	0.543633	0.438985	0.522997	0.620091	0.90406	0.849548	0.87632			Data summary							121-180 min
15	0.68294	0.639199	0.625362	0.642544	0.64421		14	0.645551	0.633122	0.711899	0.825824	0.528719	0.544535	0.748982	0.579979	0.707157	0.866106	0.611902	0.420837	0.626571	0.435165	0.55071			Number of columns (Column Factor)	3						WT vs. GriK1/3dKO (#1)	-0.07862	-0.1535 to -0.003706	Yes	*	0.038		WT vs. GriK1/3dKO (#1)	0.5027	0.5813	-0.07862	0.03376	46	45	2.329	414
16	0.682914	0.633391	0.60874	0.649496	0.63312		15	0.873793	0.561712	0.575475	0.641506	0.36835	0.261374	0.730905	0.686384	0.662601	0.791051	0.71977	0.729688	0.914891	0.70368	0.763119			Number of rows (Row Factor)	3						WT vs. GriK1/3dKO (#2)	-0.141	-0.2140 to -0.06801	Yes	****	<0.0001		WT vs. GriK1/3dKO (#2)	0.5027	0.6437	-0.141	0.0329	46	50	4.286	414
17	0.666828	0.633825	0.595193	0.646463	0.636926		16	0.55879	0.371257	0.421979	0.613646	0.526766	0.727996	0.615423	0.535768	0.530594	0.520517	0.440021	0.2222	0.575782	0.693679	0.637726			Number of values	423
18	0.664384	0.650171	0.59859	0.644237	0.656528		17	0.647892	0.521558	0.689966	0.140995	0.149398	0.116938	0.616681	0.755478	0.866016	0.540993	0.642412	0.678964	0.639545	0.488586	0.412941
19	0.644015	0.626246	0.596045	0.637603	0.679571		18	0.647811	0.595596	0.791513	0.728461	0.520921	0.38072	0.725531	0.858845	0.711632	0.811544	0.802114	0.930369	0.62599	0.693635	0.503348
20	0.65579	0.644343	0.616815	0.630485	0.659705		19	0.76295	0.463401	0.824599	0.533966	0.464667	0.405032	0.74578	0.343392	0.288064	0.680389	0.581179	0.714741	0.81389	0.391496	0.674895			Two-way ANOVA	Ordinary						Number of families	3
21	0.692938	0.662606	0.620658	0.626187	0.658643		20	0.738059	0.879351	0.535335	0.759224	0.52194	0.630738	0.768701	0.643967	0.562301	0.792577	0.462015	0.412678	0.67899	0.647232	0.580415			Alpha	0.05						Number of comparisons per family	2
22	0.69904	0.667523	0.633308	0.623386	0.652984		21	0.640901	0.673682	0.672468	0.708895	0.495175	0.652822	0.882753	0.86278	0.789807	0.92268	0.824917	0.717891	0.793735	0.794781	0.608463										Alpha	0.05
23	0.676565	0.655928	0.625248	0.626633	0.646565		22	0.760729	0.491721	0.699794	0.251616	0.201119	0.226641	0.610546	0.732123	0.777587	0.728244	0.344793	0.297548	0.686295	0.674511	0.527792			Source of Variation	% of total variation	P value	P value summary	Significant?
24	0.661958	0.66585	0.619933	0.618354	0.649203		23	0.85892	0.863025	0.776317	0.599932	0.483789	0.738103	0.646638	0.466985	0.620202	0.491616	0.2987	0.289071	0.781554	0.616593	0.679486			Interaction	1.603	0.0861	ns	No			Dunnett's multiple comparisons test	Predicted (LS) mean diff.	95.00% CI of diff.	Below threshold?	Summary	Adjusted P Value		Test details	Predicted (LS) mean 1	Predicted (LS) mean 2	Predicted (LS) mean diff.	SE of diff.	N1	N2	q	DF
25	0.642856	0.64853	0.611772	0.629806	0.627492		24	0.539079	0.251308	0.164677	0.980337	0.786351	0.646191	0.773569	0.761212	0.708562	0.745734	0.676938	0.794622	0.504348	0.442725	0.589801			Row Factor	12.41	<0.0001	****	Yes
26	0.636004	0.635451	0.62711	0.637552	0.628416		25	0.880143	0.734191	0.533237	0.926801	0.790966	0.502983	0.807306	0.801159	0.611063	0.755812	0.782176	0.579475	0.85559	0.578772	0.571147			Column Factor	4.002	<0.0001	****	Yes			0-30 min
27	0.626927	0.635643	0.623499	0.646259	0.629357		26	0.769884	0.454087	0.409103	0.652082	0.526731	0.501686	0.719137	0.550836	0.542768	0.773429	0.670394	0.624087	0.509702	0.381764	0.51834										WT vs. GriA3/4dKO (#1)	-0.008706	-0.07844 to 0.06102	No	ns	0.9449		WT vs. GriA3/4dKO (#1)	0.7013	0.71	-0.008706	0.03144	46	49	0.2769	421
28	0.61081	0.640411	0.624626	0.651666	0.618537		27	0.807503	0.756686	0.612687	0.841331	0.69263	0.844446	0.680853	0.605136	0.652939	0.710873	0.582084	0.582966	0.577966	0.603925	0.163983			ANOVA table	SS (Type III)	DF	MS	F (DFn, DFd)	P value		WT vs. GriA3/4dKO (#2)	-0.009964	-0.07969 to 0.05977	No	ns	0.9287		WT vs. GriA3/4dKO (#2)	0.7013	0.7113	-0.009964	0.03144	46	49	0.3169	421
29	0.611371	0.641485	0.625454	0.62857	0.645163		28	0.612618	0.327383	0.122968	0.575357	0.552944	0.473027	0.521375	0.499662	0.703793	0.765325	0.477056	0.621388	0.524172	0.531944	0.474271			Interaction	0.1926	4	0.04815	F (4, 421) = 2.053	P=0.0861
30	0.602601	0.639244	0.622294	0.629355	0.639147		29	0.736816	0.866379	0.628955	0.870211	0.842138	0.919867	0.628232	0.414054	0.312279	0.84266	0.460434	0.53059	0.634789	0.625534	0.573287			Row Factor	1.492	2	0.7459	F (2, 421) = 31.80	P<0.0001		31-120 min
31	0.596584	0.630914	0.632236	0.602654	0.63681		30	0.791755	0.641355	0.234074	0.978411	0.772756	0.711069	0.777864	0.680931	0.693405	0.436941	0.226963	0.467555	0.749453	0.46386	0.232379			Column Factor	0.4809	2	0.2404	F (2, 421) = 10.25	P<0.0001		WT vs. GriA3/4dKO (#1)	-0.08433	-0.1541 to -0.01460	Yes	*	0.0145		WT vs. GriA3/4dKO (#1)	0.5306	0.615	-0.08433	0.03144	46	49	2.682	421
32	0.588828	0.632145	0.627746	0.617403	0.649072		31	0.593414	0.552263	0.492929	0.625384	0.580763	0.517427	0.686963	0.836676	0.768349	0.624343	0.385524	0.51464	0.720285	0.713932	0.602423			Residual	9.874	421	0.02345				WT vs. GriA3/4dKO (#2)	-0.1148	-0.1846 to -0.04510	Yes	***	0.0006		WT vs. GriA3/4dKO (#2)	0.5306	0.6455	-0.1148	0.03144	46	49	3.652	421
33	0.583059	0.633498	0.639022	0.617406	0.654069		32	0.546397	0.456392	0.372616	0.86089	0.803743	0.76536	0.55379	0.625831	0.564506	0.670209	0.764905	0.761727	0.71542	0.683811	0.657258
34	0.548755	0.624987	0.654522	0.63454	0.675046		33	0.766695	0.535482	0.263926	0.755251	0.693925	0.71085	0.742683	0.431772	0.613877	0.671558	0.733141	0.79877	0.761135	0.681224	0.668633			Data summary							121-180 min
35	0.558615	0.631193	0.666354	0.628175	0.667903		34	0.440058	0.370421	0.547096	0.871087	0.632047	0.760937	0.7729	0.646132	0.716911	0.773872	0.645912	0.736474	0.733016	0.714937	0.692931			Number of columns (Column Factor)	3						WT vs. GriA3/4dKO (#1)	-0.1038	-0.1743 to -0.03335	Yes	**	0.0023		WT vs. GriA3/4dKO (#1)	0.5027	0.6065	-0.1038	0.03176	46	47	3.268	421
36	0.556669	0.624616	0.652263	0.637252	0.662771		35	0.731635	0.526589	0.721206	0.714065	0.608834	0.672987	0.625109	0.529756	0.44156	0.720982	0.780439	0.580391	0.620026	0.75352	0.635034			Number of rows (Row Factor)	3						WT vs. GriA3/4dKO (#2)	-0.1042	-0.1739 to -0.03445	Yes	**	0.002		WT vs. GriA3/4dKO (#2)	0.5027	0.6069	-0.1042	0.03144	46	49	3.314	421
37	0.555232	0.620006	0.640691	0.635786	0.688153		36	0.608333	0.301622	0.29811	0.778197	0.689021	0.754668	0.535904	0.558046	0.756371	0.910049	0.92786	0.792328	0.564731	0.647149	0.717496			Number of values	430
38	0.558002	0.619234	0.651269	0.629904	0.669738		37	0.479114	0.350635	0.468734	0.800304	0.53166	0.557349	0.654499	0.553054	0.629681	0.716741	0.770443	0.637461	0.736066	0.680641	0.33503
39	0.548465	0.59939	0.626231	0.610575	0.66522		38	0.887277	0.746761	0.753606	0.884301	0.731982	0.689273	0.734752	0.626901	0.577068	0.802605	0.751996	0.70368	0.756596	0.745595	0.685128
40	0.546384	0.608138	0.600895	0.631623	0.653482		39	0.633528	0.328783	0.146616	0.7384	0.566307	0.500045	0.691451	0.362219	0.353677	0.770141	0.667395	0.781592	0.7776	0.785574	0.81203
41	0.562657	0.623484	0.603688	0.636454	0.64031		40	0.709795	0.399079	0.206616	0.988084	0.916614	0.568667	0.474101	0.63283	0.850445	0.922894	0.874465	0.788639	0.802421	0.6611	0.572321
42	0.56207	0.623462	0.603877	0.631803	0.632484		41	0.614946	0.549867	0.416005	0.652541	0.635447	0.555615	0.891201	1.00595	0.865978	0.903342	0.705239	0.753863	0.694198	0.70449	0.533735
43	0.56008	0.624897	0.599219	0.62636	0.642367		42	0.412435	0.27744	0.260018	0.594496	0.648418	0.685411	0.672701	0.527851	0.502316	0.75042	0.558327	0.70431	0.539256	0.590013	0.684683
44	0.561336	0.608323	0.588571	0.626726	0.651503		43	0.551569	0.3672	0.25234	0.944153	0.977736	0.980548	0.659614	0.645455	0.642152	0.745633	0.465623	0.439271	0.636397	0.595007	0.616902
45	0.551337	0.600008	0.582753	0.613376	0.651174		44	0.658508	0.336528	0.301367	0.669213	0.720508	0.533877	0.626125	0.588524	0.572546	0.716074	0.779415	0.66101	0.454909	0.510024	0.703456
46	0.544451	0.619055	0.593502	0.632407	0.659476		45	0.418143	0.423736	0.583498	0.820808	0.54894	0.562919	0.638528	0.720383	0.601819	0.724223	0.512426	0.30405	0.663053	0.664502	0.685088
47	0.552295	0.614295	0.592671	0.638598	0.643301		46	0.47896	0.599667	0.652827				0.908206	0.595458	0.748978	0.502474	0.537233	0.685336	0.814163	0.653313	0.674581
48	0.545991	0.614279	0.590323	0.641099	0.659391		47	0.632195	0.299447	0.349536				0.467617	0.665173	0.574773	0.545305	0.773611	0.629589	0.825554	0.662991	0.611757
49	0.536431	0.617125	0.596866	0.662033	0.662521		48	0.916274	0.649208	0.63079				0.565893	0.729416	0.798985				0.875984	0.711314	0.750171
50	0.541855	0.590137	0.595608	0.65544	0.677252		49							0.921206	0.628491	0.69576	0.908535	0.756613	0.741515	0.581973	0.611434	0.510759
51	0.548228	0.587617	0.598335	0.63693	0.679483		50							0.657778	0.595629	0.580252	0.909003	0.651059	0.569888
52	0.545771	0.555516	0.60566	0.661695	0.683814
53	0.541208	0.544742	0.602944	0.649049	0.662247		Track count	46	46	46	45	45	45	50	50	50	49	49	47	49	49	49
54	0.549524	0.553134	0.630888	0.642651	0.656836		Average	0.701342	0.530632	0.502663	0.697037	0.587582	0.581281	0.6797	0.620165	0.643663	0.710049	0.614958	0.606477	0.711306	0.645462	0.606861
55	0.547631	0.56007	0.65468	0.650348	0.650654
56	0.519687	0.569444	0.627157	0.634999	0.673402
57	0.540683	0.582193	0.634448	0.617226	0.683143
58	0.538349	0.571454	0.608335	0.613271	0.684999
59	0.523687	0.568334	0.617114	0.630642	0.668731
60	0.519614	0.557447	0.620943	0.634087	0.652085
61	0.535225	0.578033	0.609932	0.637034	0.683256
62	0.556578	0.568744	0.628485	0.630892	0.696393
63	0.558918	0.579082	0.637625	0.650619	0.688403
64	0.54991	0.590708	0.638506	0.627949	0.67118
65	0.529424	0.567653	0.638669	0.611915	0.67647
66	0.534775	0.574476	0.654776	0.649221	0.680369
67	0.533071	0.578074	0.646501	0.633383	0.686257
68	0.519644	0.578897	0.647128	0.626855	0.682303
69	0.515238	0.583298	0.637518	0.602113	0.684922
70	0.513782	0.581344	0.636057	0.604472	0.678427
71	0.516283	0.612687	0.644239	0.591333	0.663598
72	0.535644	0.603432	0.640527	0.602142	0.672624
73	0.523669	0.60231	0.630464	0.627689	0.650969
74	0.529308	0.620556	0.64532	0.610706	0.651672
75	0.520489	0.598449	0.651361	0.601901	0.673087
76	0.513931	0.611204	0.653308	0.59788	0.657327
77	0.526678	0.589572	0.620869	0.588778	0.649917
78	0.530132	0.589825	0.617044	0.599618	0.647806
79	0.523614	0.587137	0.631333	0.588832	0.657735
80	0.517016	0.574102	0.639289	0.586647	0.670325
81	0.528478	0.583721	0.6371	0.574717	0.669722
82	0.513971	0.582377	0.634168	0.574995	0.655923
83	0.503003	0.563227	0.629372	0.587331	0.661585
84	0.498443	0.560345	0.626503	0.59843	0.622467
85	0.511617	0.574755	0.631014	0.592228	0.628723
86	0.519297	0.595213	0.641911	0.596053	0.615585
87	0.519258	0.571767	0.655103	0.615169	0.626587
88	0.51864	0.574909	0.62488	0.604688	0.638311
89	0.502633	0.576331	0.647733	0.594818	0.640036
90	0.500979	0.579025	0.624159	0.598108	0.63975
91	0.524113	0.596499	0.632151	0.599533	0.642181
92	0.519845	0.582099	0.618991	0.607876	0.639685
93	0.508803	0.57568	0.615932	0.617469	0.623822
94	0.502741	0.561687	0.616159	0.623337	0.610457
95	0.502569	0.572318	0.593913	0.614901	0.60381
96	0.497528	0.579681	0.5971	0.635469	0.590018
97	0.491413	0.572521	0.602132	0.63646	0.597208
98	0.493478	0.56989	0.58972	0.630844	0.613444
99	0.511592	0.567106	0.5914	0.62217	0.607248
100	0.51464	0.581807	0.606006	0.613732	0.633407
101	0.5181	0.576335	0.624013	0.616211	0.622226
102	0.525746	0.588353	0.600595	0.620723	0.611489
103	0.524024	0.593723	0.610725	0.617566	0.621314
104	0.518234	0.586282	0.594383	0.618598	0.637876
105	0.539872	0.585343	0.611314	0.62187	0.630318
106	0.518404	0.574692	0.60838	0.619359	0.637475
107	0.513006	0.594499	0.601897	0.609892	0.62557
108	0.520889	0.582472	0.57764	0.6083	0.605274
109	0.531883	0.574726	0.591762	0.60646	0.569473
110	0.522892	0.589348	0.595165	0.597567	0.596429
111	0.526923	0.579276	0.602387	0.591579	0.608205
112	0.524347	0.592149	0.602647	0.578733	0.60809
113	0.541896	0.583338	0.626584	0.607296	0.608503
114	0.52335	0.579268	0.613931	0.602716	0.627587
115	0.536705	0.566949	0.613176	0.60423	0.612195
116	0.525071	0.555505	0.59757	0.607326	0.619796
117	0.521019	0.573177	0.598833	0.598457	0.617859
118	0.510241	0.576326	0.611819	0.597895	0.612791
119	0.506031	0.569367	0.607532	0.586493	0.59853
120	0.508358	0.561556	0.621324	0.576676	0.600153
121	0.498016	0.559158	0.622082	0.581077	0.593809
122	0.49344	0.56521	0.62282	0.584353	0.592435
123	0.496745	0.568828	0.636469	0.606715	0.589156
124	0.487314	0.571357	0.634483	0.601825	0.564898
125	0.481146	0.573419	0.63655	0.585649	0.574894
126	0.477425	0.585148	0.633388	0.581658	0.58174
127	0.491259	0.57958	0.641347	0.578905	0.589017
128	0.487598	0.573611	0.629738	0.582894	0.600071
129	0.499883	0.568616	0.615426	0.585017	0.606966
130	0.489063	0.57157	0.632225	0.582425	0.607796
131	0.495001	0.5434	0.650006	0.584475	0.620735
132	0.50036	0.558256	0.663595	0.579329	0.602211
133	0.485482	0.554847	0.652461	0.571522	0.592347
134	0.502533	0.578882	0.64821	0.591116	0.604483
135	0.497318	0.590747	0.65011	0.58523	0.599948
136	0.508263	0.622942	0.679927	0.581054	0.606912
137	0.508281	0.595888	0.665998	0.59639	0.591535
138	0.501508	0.581164	0.648168	0.602204	0.593438
139	0.492371	0.585789	0.633268	0.602951	0.607837
140	0.50098	0.603974	0.65266	0.609866	0.60264
141	0.492202	0.590484	0.640336	0.624169	0.607708
142	0.495949	0.572969	0.652773	0.631504	0.605534
143	0.502526	0.589055	0.653744	0.618939	0.609738
144	0.495954	0.57386	0.651607	0.629497	0.601817
145	0.483804	0.581782	0.652603	0.606399	0.623609
146	0.481841	0.589815	0.645838	0.613107	0.616569
147	0.483817	0.581272	0.62791	0.623765	0.611927
148	0.4876	0.603851	0.642079	0.617841	0.626406
149	0.485517	0.590209	0.659558	0.600562	0.618845
150	0.482936	0.617309	0.644628	0.60596	0.610625
151	0.483973	0.601688	0.643453	0.608295	0.624713
152	0.503504	0.598312	0.636411	0.600311	0.623845
153	0.51203	0.580312	0.648326	0.610672	0.627088
154	0.522709	0.594982	0.642163	0.614157	0.629521
155	0.525164	0.583314	0.631561	0.629245	0.620138
156	0.514266	0.563472	0.657381	0.622407	0.611038
157	0.520608	0.580426	0.656961	0.624497	0.614218
158	0.515823	0.587318	0.633225	0.621352	0.602141
159	0.520928	0.578851	0.647837	0.600564	0.598484
160	0.531188	0.558589	0.643874	0.602272	0.608305
161	0.527558	0.583235	0.642739	0.611798	0.611593
162	0.528113	0.589689	0.639055	0.612808	0.598106
163	0.529342	0.601186	0.645412	0.617213	0.579729
164	0.535978	0.581691	0.653419	0.621681	0.610681
165	0.536142	0.583228	0.647541	0.619586	0.601461
166	0.537238	0.580913	0.656285	0.61568	0.590645
167	0.535186	0.593932	0.664173	0.626017	0.590838
168	0.514995	0.595922	0.660588	0.623955	0.601591
169	0.512416	0.576327	0.662745	0.623245	0.618588
170	0.506069	0.578915	0.642593	0.639873	0.605504
171	0.50999	0.562929	0.619507	0.638603	0.594369
172	0.505614	0.570374	0.65068	0.613853	0.604311
173	0.497188	0.580328	0.6621	0.597114	0.600957
174	0.507703	0.558499	0.652808	0.609416	0.617521
175	0.50766	0.568335	0.637532	0.619629	0.601846
176	0.49387	0.59805	0.622057	0.614179	0.61705
177	0.481191	0.575153	0.632124	0.604529	0.622209
178	0.480946	0.572439	0.616227	0.608631	0.613182
179	0.492008	0.597285	0.613764	0.592506	0.627888
180	0.481012	0.589422	0.623902	0.598126	0.652256
Average	0.549743	0.603787	0.637846	0.628705	0.643368
Track count in average	46	45	50	49	49
Panel C
time (min)	WT + Wnt3a beads (repeated from Fig.4)	CNQX			WT + Wnt3a beads (repeated from Fig.4)			CNQX					Two-way ANOVA	Ordinary						Number of families	1
1	0.905831	0.945229		Track #	Average 1-30	Average 31-120 min	Average 121-180 min	Average 1-30	Average 31-120 min	Average 121-180 min			Alpha	0.05						Number of comparisons per family	3
2	0.837205	0.884468		1	1.20441	0.739156	0.705452	1.00122	1.00954	0.869094										Alpha	0.05
3	0.805732	0.867588		2									Source of Variation	% of total variation	P value	P value summary	Significant?
4	0.773411	0.88261		3	0.868412	0.353938	0.342944	0.780685	0.683759	0.700012			Interaction	0.9975	0.1545	ns	No			Šídák's multiple comparisons test	Predicted (LS) mean diff.	95.00% CI of diff.	Below threshold?	Summary	Adjusted P Value
5	0.773857	0.858847		4	0.815645	0.425246	0.202726	0.88436	1.00374	0.972904			Row Factor	7.878	<0.0001	****	Yes
6	0.770461	0.854421		5	0.93898	0.683067	0.442621	0.944999	0.551654	0.399357			Column Factor	20.24	<0.0001	****	Yes			WT - CNQX
7	0.757193	0.871554		6	0.70502	0.554622	0.525346	0.901302	0.788184	0.950968										0-30 min	-0.1431	-0.2424 to -0.04374	Yes	**	0.0019
8	0.738409	0.890743		7	0.697953	0.564574	0.517795	0.828635	0.823511	0.993348			ANOVA table	SS (Type III)	DF	MS	F (DFn, DFd)	P value		31-120min	-0.2426	-0.3419 to -0.1433	Yes	****	<0.0001
9	0.722453	0.87201		8	0.724425	0.256392	0.458611	1.1721	1.08078	0.975219			Interaction	0.1462	2	0.07311	F (2, 267) = 1.880	P=0.1545		121-180 min	-0.2399	-0.3392 to -0.1405	Yes	****	<0.0001
10	0.719269	0.885192		9	0.848954	0.696803	0.524152	1.07113	0.74646	0.54209			Row Factor	1.155	2	0.5774	F (2, 267) = 14.85	P<0.0001
11	0.70246	0.855897		10	0.599341	0.431608	0.682569	0.665689	0.578187	0.774213			Column Factor	2.967	1	2.967	F (1, 267) = 76.31	P<0.0001
12	0.695907	0.853978		11	0.811145	0.839852	0.802988	0.366618	0.395343	0.904488			Residual	10.38	267	0.03888				Test details	Predicted (LS) mean 1	Predicted (LS) mean 2	Predicted (LS) mean diff.	SE of diff.	N1	N2	t	DF
13	0.700916	0.836283		12				0.719127	0.73917	0.293237
14	0.679227	0.835781		13	0.694998	0.70686	0.794401	1.04793	0.568663	0.823688			Difference between column means							WT - CNQX
15	0.68294	0.842609		14	0.645551	0.633122	0.711899	0.454027	0.549028	0.498505			Predicted (LS) mean of WT	0.5782						0-30 min	0.7013	0.8444	-0.1431	0.04134	46	45	3.461	267
16	0.682914	0.823074		15	0.873793	0.561712	0.575475	0.976436	0.777822	0.641213			Predicted (LS) mean of CNQX	0.7867						31-120min	0.5306	0.7732	-0.2426	0.04134	46	45	5.868	267
17	0.666828	0.821101		16	0.55879	0.371257	0.421979	0.777086	0.878006	0.947996			Difference between predicted means	-0.2085						121-180 min	0.5027	0.7425	-0.2399	0.04134	46	45	5.802	267
18	0.664384	0.795566		17	0.647892	0.521558	0.689966	0.801894	0.912297	0.93672			SE of difference	0.02387
19	0.644015	0.809226		18	0.647811	0.595596	0.791513	0.68982	0.587241	0.589917			95% CI of difference	-0.2555 to -0.1615
20	0.65579	0.82329		19	0.76295	0.463401	0.824599	0.523229	0.613069	0.656727
21	0.692938	0.821599		20	0.738059	0.879351	0.535335	0.8413	0.508289	0.519977			Data summary
22	0.69904	0.837543		21	0.640901	0.673682	0.672468	0.72694	0.428113	0.355687			Number of columns (Column Factor)	2
23	0.676565	0.831066		22	0.760729	0.491721	0.699794	0.729931	0.508473	0.482861			Number of rows (Row Factor)	3
24	0.661958	0.819883		23	0.85892	0.863025	0.776317	0.99351	0.582709	0.553336			Number of values	273
25	0.642856	0.811777		24	0.539079	0.251308	0.164677	0.631372	0.459706	0.463401
26	0.636004	0.851217		25	0.880143	0.734191	0.533237	1.0538	0.819258	0.614006
27	0.626927	0.826988		26	0.769884	0.454087	0.409103
28	0.61081	0.797065		27	0.807503	0.756686	0.612687	1.0407	0.690544	0.330104
29	0.611371	0.818965		28	0.612618	0.327383	0.122968	0.635086	1.08008	0.987934
30	0.602601	0.806888		29	0.736816	0.866379	0.628955	1.08783	1.06957	1.13157
31	0.596584	0.810043		30	0.791755	0.641355	0.234074	0.890231	0.959975	1.03404
32	0.588828	0.795491		31	0.593414	0.552263	0.492929	0.566365	0.641918	0.687974
33	0.583059	0.817072		32	0.546397	0.456392	0.372616	0.832078	0.880625	0.928719
34	0.548755	0.829528		33	0.766695	0.535482	0.263926	0.658179	0.962834	0.820003
35	0.558615	0.837918		34	0.440058	0.370421	0.547096	0.858621	0.710614	0.861577
36	0.556669	0.81504		35	0.731635	0.526589	0.721206	0.936001	0.994258	1.00436
37	0.555232	0.831653		36	0.608333	0.301622	0.29811	1.02135	0.639773	0.476772
38	0.558002	0.799728		37	0.479114	0.350635	0.468734	1.12317	1.02378	0.758512
39	0.548465	0.80302		38	0.887277	0.746761	0.753606	0.379877	0.470279	0.561964
40	0.546384	0.791017		39	0.633528	0.328783	0.146616	0.876777	0.883908	0.508204
41	0.562657	0.794632		40	0.709795	0.399079	0.206616	1.0475	0.990546	0.986132
42	0.56207	0.784064		41	0.614946	0.549867	0.416005	0.508064	0.713314	0.842446
43	0.56008	0.775144		42	0.412435	0.27744	0.260018	1.16745	1.08974	1.04415
44	0.561336	0.8025		43	0.551569	0.3672	0.25234	0.837291	0.838197	0.851689
45	0.551337	0.810624		44	0.658508	0.336528	0.301367	0.993251	1.03314	0.738683
46	0.544451	0.801985		45	0.418143	0.423736	0.583498	0.797454	1.03897	1.03369
47	0.552295	0.817108		46	0.47896	0.599667	0.652827	0.995901	0.73775	0.723787
48	0.545991	0.803736		47	0.632195	0.299447	0.349536	1.16236	0.752705	0.642789
49	0.536431	0.8412		48	0.916274	0.649208	0.63079
50	0.541855	0.790691		49
51	0.548228	0.821799		50
52	0.545771	0.797877
53	0.541208	0.789276		Track count	46	46	46	45	45	45
54	0.549524	0.801492		Average	0.701342	0.530632	0.502663	0.844415	0.773234	0.742535
55	0.547631	0.78259
56	0.519687	0.782577
57	0.540683	0.766672
58	0.538349	0.75752
59	0.523687	0.763181
60	0.519614	0.761759
61	0.535225	0.787456
62	0.556578	0.776763
63	0.558918	0.764701
64	0.54991	0.76746
65	0.529424	0.796169
66	0.534775	0.79578
67	0.533071	0.78643
68	0.519644	0.78658
69	0.515238	0.784185
70	0.513782	0.756466
71	0.516283	0.787918
72	0.535644	0.766646
73	0.523669	0.779238
74	0.529308	0.782397
75	0.520489	0.78857
76	0.513931	0.784619
77	0.526678	0.774118
78	0.530132	0.770545
79	0.523614	0.773987
80	0.517016	0.774988
81	0.528478	0.792765
82	0.513971	0.784569
83	0.503003	0.805519
84	0.498443	0.784707
85	0.511617	0.802132
86	0.519297	0.782149
87	0.519258	0.772363
88	0.51864	0.776417
89	0.502633	0.777544
90	0.500979	0.778734
91	0.524113	0.790996
92	0.519845	0.799841
93	0.508803	0.803617
94	0.502741	0.800049
95	0.502569	0.776532
96	0.497528	0.755802
97	0.491413	0.75604
98	0.493478	0.74951
99	0.511592	0.752058
100	0.51464	0.76301
101	0.5181	0.743444
102	0.525746	0.737758
103	0.524024	0.729156
104	0.518234	0.725405
105	0.539872	0.722288
106	0.518404	0.726618
107	0.513006	0.69829
108	0.520889	0.708644
109	0.531883	0.709102
110	0.522892	0.702294
111	0.526923	0.703729
112	0.524347	0.679134
113	0.541896	0.691887
114	0.52335	0.695358
115	0.536705	0.718639
116	0.525071	0.723577
117	0.521019	0.752573
118	0.510241	0.743164
119	0.506031	0.770871
120	0.508358	0.742808
121	0.498016	0.731217
122	0.49344	0.737154
123	0.496745	0.741118
124	0.487314	0.728446
125	0.481146	0.735554
126	0.477425	0.737329
127	0.491259	0.725936
128	0.487598	0.7234
129	0.499883	0.736688
130	0.489063	0.748161
131	0.495001	0.721431
132	0.50036	0.748727
133	0.485482	0.756374
134	0.502533	0.7582
135	0.497318	0.75163
136	0.508263	0.763208
137	0.508281	0.756659
138	0.501508	0.748581
139	0.492371	0.727165
140	0.50098	0.741424
141	0.492202	0.745504
142	0.495949	0.761961
143	0.502526	0.750081
144	0.495954	0.731679
145	0.483804	0.724148
146	0.481841	0.714992
147	0.483817	0.72832
148	0.4876	0.725013
149	0.485517	0.735299
150	0.482936	0.730058
151	0.483973	0.721735
152	0.503504	0.724497
153	0.51203	0.716131
154	0.522709	0.733851
155	0.525164	0.749269
156	0.514266	0.757113
157	0.520608	0.753932
158	0.515823	0.74601
159	0.520928	0.7432
160	0.531188	0.746937
161	0.527558	0.743297
162	0.528113	0.742186
163	0.529342	0.755415
164	0.535978	0.736608
165	0.536142	0.75273
166	0.537238	0.725911
167	0.535186	0.722763
168	0.514995	0.741509
169	0.512416	0.760499
170	0.506069	0.781126
171	0.50999	0.765379
172	0.505614	0.753123
173	0.497188	0.755777
174	0.507703	0.762675
175	0.50766	0.747932
176	0.49387	0.767619
177	0.481191	0.748739
178	0.480946	0.775974
179	0.492008	0.791599
180	0.481012	0.777894
Average	0.549743	0.775502
Track count in average	46	45
Panel D
Wnt bead movement	WT active (repeated from Fig.4)	GriK13dKO-c6	GriK13dKO-c21	GriA34dKO-c27	GriA34dKO-c50	CNQX		ANOVA summary							Number of families	1
	3.78212	9.28889	5.01667	6.82222	3.12778	6.72778		F	4.703						Number of comparisons per family	5
	38.5418994*	4	5.2	7.14286	3	5.16667		P value	0.0004						Alpha	0.05
	3.59777	3.2	3.19444	4.17778	4.02778	2.17778		P value summary	***
	3.37989	4.88889	3.11111	102.378378*	2.71667	3.23333		Significant diff. among means (P < 0.05)?	Yes						Dunnett's multiple comparisons test	Mean Diff.	95.00% CI of diff.	Below threshold?	Summary	Adjusted P Value	A-?
	2.84916	5.17778	3.09444	4.4	3.51111	1.75		R squared	0.07748						WT active vs. GriK13dKO (#1)	-1.058	-1.974 to -0.1425	Yes	*	0.0167	B	GriK13dKO (#1)
	4.32961	5.57778	2.42222	7.04444	3.68889	1.56111									WT active vs. GriK13dKO (#2)	-0.7953	-1.687 to 0.09633	No	ns	0.0979	C	GriK13dKO (#2)
	5.13966	3.13333	2.64444	6.37778	2.08333	7.48889		Brown-Forsythe test							WT active vs. GriA34dKO (#1)	-1.39	-2.286 to -0.4939	Yes	***	0.0006	D	GriA34dKO (#1)
	3.35754	3.57778	4.06111	3.86667	3.72222	1.38889		F (DFn, DFd)	0.9543 (5, 280)						WT active vs. GriA34dKO (#2)	-0.5945	-1.491 to 0.3015	No	ns	0.3167	E	GriA34dKO (#2)
	3.26816	5.22222	2.92778	5.66667	1.98333	2.32222		P value	0.4463						WT active vs. CNQX	-0.05597	-0.9715 to 0.8596	No	ns	0.9998	F	CNQX
	2.36872	5.62222	3.17222	7.13333	2.83333	1.79444		P value summary	ns
	4.58659	5.86667	3.11667	8.62222	3.17222	1.60556		Are SDs significantly different (P < 0.05)?	No						Test details	Mean 1	Mean 2	Mean Diff.	SE of diff.	n1	n2	q	DF
	8.52514	4.24444	3.75556	4.22222	2.58889	2.41667									WT active vs. GriK13dKO (#1)	3.334	4.392	-1.058	0.3623	48	45	2.921	280
	4.84916	3.2	4.9	5.44444	3.45	2.01667		Bartlett's test							WT active vs. GriK13dKO (#2)	3.334	4.129	-0.7953	0.3528	48	50	2.254	280
	7.32961	7.42222	3.82778	4.22222	2.46111	1.83333		Bartlett's statistic (corrected)	12.72						WT active vs. GriA34dKO (#1)	3.334	4.724	-1.39	0.3546	48	49	3.92	280
	3.09497	2.77778	3.45556	4.93333	3.22778	2.03889		P value	0.0261						WT active vs. GriA34dKO (#2)	3.334	3.929	-0.5945	0.3546	48	49	1.677	280
	3.32961	2.28889	3.07778	4.84444	2.8	3.24444		P value summary	*						WT active vs. CNQX	3.334	3.39	-0.05597	0.3623	48	45	0.1545	280
	2.59218	2.53333	3.42778	3.73333	1.43333	2.19444		Are SDs significantly different (P < 0.05)?	Yes
	2.76536	3.44444	2.86667	4.71111	1.81111	4.74444
	3.06145	9.97778	2.40556	10.7333	6.22222	1.39444		ANOVA table	SS	DF	MS	F (DFn, DFd)	P value
	4.46927	2.95556	5.89444	3.57778	6.1	3.92222		Treatment (between columns)	71.68	5	14.34	F (5, 280) = 4.703	P=0.0004
	1.77654	3.77778	3.90556	3.62222	3.84444	3.72778		Residual (within columns)	853.6	280	3.048
	4.83799	5.2	5.94444	4.15556	4.23333	3.19444		Total	925.3	285
	3.94972	5.37778	4.68889	5.02222	5.21111	2.88333
	3.4581	6.42222	3.71111	4.08889	3.7	2.36667		Data summary
	2.84916	5.08889	5.69444	6.4	2.4	3.41667		Number of treatments (columns)	6
	2.46369	3.71111	2.56111	3.17778	3.61667	6.28333		Number of values (total)	286
	2.03352	3.08889	3.01667	4.64444	6.47222	2.93333
	2.12849	2.68889	4.61111	3.88889	3.80556	4.47778
	4.6648	1.71111	4.53889	4.11111	3.21667	6.06667
	2.51955	3.17778	4.25	3.22222	3.22778	2.73889
	3.18994	3.02222	4.84444	3.46667	3.46111	3.23889
	2	3.35556	3.73333	4.57778	5.07778	3.53889
	2.80447	5.97778	11.4056	3.73333	5.3	3.95
	2.75419	4.31111	6.65	2.84444	5.10556	1.92222
	2.94972	4	6.44444	4.71111	4.6	29.4944444*
	3.2905	4.35556	5.17222	4.4	5.72778	6.21111
	2.92179	4.4	2.71667	5.88889	8.93333	1.1
	1.74302	3.33333	4.68333	5.42222	5.18333	1.75
	2.30168	7.15556	2.06111	4.77778	8.04444	5.12778
	2.53073	4.8	5.13889	3.64444	2.78889	44.3888889*
	1.35754	2.88889	5.44444	3.26667	2.01667	1.87778
	1.64804	4.48889	3.83889	5	1.98333	5.92778
	3.23464	1.4	6.66667	4.06667	3.86111	5.84444
	3.75419	5.13333	1.82222	2.71111	3.03889	3.1
	4.15084	4.37778	3.27222	4.77778	2.09444	8.16667
	2.13408		4.58889	4.93333	2.03333	2.37222
	5.11732		4.20556	3.08889	3.11111	1.31111
	1.78771		4.99444	3.48889	14.4556
	3.00559		2.48889	3.55556	1.99444
			1.8	3.11111
Count	48	45	50	49	49	45
Mean	3.33403	4.3921	4.12933	4.724	3.92857	3.39
Median	3.07821	4.24444	3.83333	4.4	3.45	2.93333
blue values are excluded outliers
Panel E
	Percentage		Count				P value and statistical significance					P value and statistical significance					P value and statistical significance					P value and statistical significance					P value and statistical significance
	Retains	Drops	Retains	Drops	Total		Test	Fisher's exact test				Test	Fisher's exact test				Test	Fisher's exact test				Test	Fisher's exact test				Test	Fisher's exact test
WT (Wnt3a)	95.9184	4.08163	47	2	49		P value	>0.9999				P value	>0.9999				P value	>0.9999				P value	0.6101				P value	0.236
GriK1/3dKO (#1)	97.2973	2.7027	36	1	37		P value summary	ns				P value summary	ns				P value summary	ns				P value summary	ns				P value summary	ns
GriK1/3dKO (#2)	97.3684	2.63158	37	1	38		One- or two-sided	Two-sided				One- or two-sided	Two-sided				One- or two-sided	Two-sided				One- or two-sided	Two-sided				One- or two-sided	Two-sided
GriA3/4dKO (#1)	97.6744	2.32558	42	1	43		Statistically significant (P < 0.05)?	No				Statistically significant (P < 0.05)?	No				Statistically significant (P < 0.05)?	No				Statistically significant (P < 0.05)?	No				Statistically significant (P < 0.05)?	No
GriA3/4dKO (#2)	98.0769	1.92308	51	1	52
CNQX	87.5	12.5	35	5	40		Data analyzed	Retains	Drops	Total		Data analyzed	Retains	Drops	Total		Data analyzed	Retains	Drops	Total		Data analyzed	Retains	Drops	Total		Data analyzed	Retains	Drops	Total
							WT (Wnt3a)	47	2	49		WT (Wnt3a)	47	2	49		WT (Wnt3a)	47	2	49		WT (Wnt3a)	47	2	49		WT (Wnt3a)	47	2	49
							GriK1/3dKO (#1)	36	1	37		GriK1/3dKO (#2)	37	1	38		GriA3/4dKO (#1)	42	1	43		GriA3/4dKO (#2)	51	1	52		CNQX	35	5	40
							Total	83	3	86		Total	84	3	87		Total	89	3	92		Total	98	3	101		Total	82	7	89
							Percentage of row total	Retains	Drops			Percentage of row total	Retains	Drops			Percentage of row total	Retains	Drops			Percentage of row total	Retains	Drops			Percentage of row total	Retains	Drops
							WT (Wnt3a)	95.92%	4.08%			WT (Wnt3a)	95.92%	4.08%			WT (Wnt3a)	95.92%	4.08%			WT (Wnt3a)	95.92%	4.08%			WT (Wnt3a)	95.92%	4.08%
							GriK1/3dKO (#1)	97.30%	2.70%			GriK1/3dKO (#2)	97.37%	2.63%			GriA3/4dKO (#1)	97.67%	2.33%			GriA3/4dKO (#2)	98.08%	1.92%			CNQX	87.50%	12.50%
							Percentage of column total	Retains	Drops			Percentage of column total	Retains	Drops			Percentage of column total	Retains	Drops			Percentage of column total	Retains	Drops			Percentage of column total	Retains	Drops
							WT (Wnt3a)	56.63%	66.67%			WT (Wnt3a)	55.95%	66.67%			WT (Wnt3a)	52.81%	66.67%			WT (Wnt3a)	47.96%	66.67%			WT (Wnt3a)	57.32%	28.57%
							GriK1/3dKO (#1)	43.37%	33.33%			GriK1/3dKO (#2)	44.05%	33.33%			GriA3/4dKO (#1)	47.19%	33.33%			GriA3/4dKO (#2)	52.04%	33.33%			CNQX	42.68%	71.43%
							Percentage of grand total	Retains	Drops			Percentage of grand total	Retains	Drops			Percentage of grand total	Retains	Drops			Percentage of grand total	Retains	Drops			Percentage of grand total	Retains	Drops
							WT (Wnt3a)	54.65%	2.33%			WT (Wnt3a)	54.02%	2.30%			WT (Wnt3a)	51.09%	2.17%			WT (Wnt3a)	46.53%	1.98%			WT (Wnt3a)	52.81%	2.25%
							GriK1/3dKO (#1)	41.86%	1.16%			GriK1/3dKO (#2)	42.53%	1.15%			GriA3/4dKO (#1)	45.65%	1.09%			GriA3/4dKO (#2)	50.50%	0.99%			CNQX	39.33%	5.62%
