# Supplementary material for: Wnt- and glutamate-receptors orchestrate stem cell dynamics and asymmetric cell division
Source: eLife. 2021 May 24;10:e59791. doi: 10.7554/eLife.59791 (PMC8177892; doi:10.7554/eLife.59791)
Supplement: Figure 8—source data 1. [file elife-59791-fig8-data1.xlsx]

## Sheet: Figure 8
Panel C, D, E, F, G, H, I, J, K, L
	WT + Wnt3a	WT + iWnt3a	Lrp5KO (#1)	Lrp6KO (#1)	Lrp5/6dKO (#1)	BKO	Lrp5KO (#2)	Lrp6KO (#2)	Lrp5/6dKO (#2)		WT + Wnt3a			WT + Wnt3a			WT + Wnt3a			WT + Wnt3a			WT + Wnt3a
	85.121	46.146	81.316	35.791	54.019	81.228	13.947	46.51	26.57		vs.			vs.			vs.			vs.			vs.
	64.537	15.167	51.54	1.479	76.105	49.408	41.515	81.229	41.88		WT + iWnt3a			Lrp5KO (#1)			Lrp6KO (#1)			Lrp5/6dKO (#1)			BKO
	47.482	2.121	42.587	9.751	72.443	8.943	64.592	85.718	49.09
	83.112	12.475	54.479	28.413	68.379	79.167	4.236	26.856	34.49		Kolmogorov-Smirnov test			Kolmogorov-Smirnov test			Kolmogorov-Smirnov test			Kolmogorov-Smirnov test			Kolmogorov-Smirnov test
	20.065	45.69	54.038	49.887	6.746	22.473	49.054	26.05	56.89		P value	0.0034		P value	0.0002		P value	<0.0001		P value	0.0001		P value	0.0012
	89.761	57.592	26.607	8.507	14.631	6.096	38.825	73.48	42.4		Exact or approximate P value?	Approximate		Exact or approximate P value?	Approximate		Exact or approximate P value?	Approximate		Exact or approximate P value?	Approximate		Exact or approximate P value?	Approximate
	85.236	64.654	79.787	21.533	22.834	6.236	17.019	87.13	35.84		P value summary	**		P value summary	***		P value summary	****		P value summary	***		P value summary	**
	17.705	2.42	2.592	37.618	38.157	58.094	19.158	24.07	39.57		Significantly different (P < 0.05)?	Yes		Significantly different (P < 0.05)?	Yes		Significantly different (P < 0.05)?	Yes		Significantly different (P < 0.05)?	Yes		Significantly different (P < 0.05)?	Yes
	74.745	27.88	88.575	60.528	19.012	63.838	25.733	57.918	19.03		Kolmogorov-Smirnov D	0.2235		Kolmogorov-Smirnov D	0.3051		Kolmogorov-Smirnov D	0.3351		Kolmogorov-Smirnov D	0.2984		Kolmogorov-Smirnov D	0.2344
	82.875	81.347	86.987	35.838	78.69	72.024	11.422	21	36.07
	79.509	74.95	79.207	83.848	42.335	11.918	2.507	28.42	1.95					WT + Wnt3a			WT + Wnt3a			WT + Wnt3a
	33.959	30.79	7.341	10.687	4.269	9.234	51.973	61.587	3.4					vs.			vs.			vs.
	79.413	83.967	22.145	50.625	53.881	79.261	81.579	18	5.36					Lrp5KO (#2)			Lrp6KO (#2)			Lrp5/6dKO (#2)
	30.405	87.656	33.906	58.159	59.752	1.529	56.143	55.08	4.85
	0.585	8.596	45	11.662	42.645	46.892	45.909	84.806	63.16					Kolmogorov-Smirnov test			Kolmogorov-Smirnov test			Kolmogorov-Smirnov test
	74.555	67.76	10.305	51.803	30.926	39.304	78.028	54.52	42.47					P value	<0.0001		P value	0.0051		P value	<0.0001
	80.313	66.546	5.982	25.346	56.524	58.824	9.593	19.66	23.97					Exact or approximate P value?	Approximate		Exact or approximate P value?	Approximate		Exact or approximate P value?	Approximate
	84.472	1.923	26.171	3.205	71.565	37.624	38.618	78.835	35.73					P value summary	****		P value summary	**		P value summary	****
	87.397	54.79	36.973	35.764	81.469	55.799	42.129	90	77.01					Significantly different (P < 0.05)?	Yes		Significantly different (P < 0.05)?	Yes		Significantly different (P < 0.05)?	Yes
	30.489	14.676	39.337	8.842	14.631	40.344	30.774	45	82.4					Kolmogorov-Smirnov D	0.2877		Kolmogorov-Smirnov D	0.2494		Kolmogorov-Smirnov D	0.3651
	52.07	10.345	3.896	83.538	45.863	80.841	51.06	20	27.44
	72.103	18.673	4.764	24.581	86.861	1.79	13.845	0.843	49.57				Counts				Expected randomised distribution				Chi squared
	83.718	21.944	59.964	27.66	42.902	19.115	76.655	35	33.72		Cell line	clone	0-30	30-60	60-90	total	expected 0-30	expected 30-60	expected 60-90	total	0-30	30-60	60-90	Sum	p-value (2 df)	Stars
	18.031	61.401	5.488	24.429	14.036	10.248	39.676	73.286	51.06		WT		35	50	85	170	56.6667	56.6667	56.6667	170	8.28431	0.784314	14.1667	23.2353	<0.001	***
	79.198	61.147	16.294	23.474	13.799	12.16	88.977	2.64	48.48		WT + iWnt3a		43	26	33	102	34	34	34	102	2.38235	1.88235	0.029412	4.29412	0.2-0.1	ns
	85.764	61.689	45.924	86.377	22.256	86.82	40.317	24	67.48		Lrp5KO	#1	31	25	15	71	23.6667	23.6667	23.6667	71	2.2723	0.075117	3.17371	5.52113	0.1-0.05	ns
	17.781	58.036	37.014	82.569	37.875	35.665	87.774	18	85.57		Lrp6KO	#1	32	25	15	72	24	24	24	72	2.66667	0.041667	3.375	6.08333	0.05-0.02	*
	55.616	0.095	31.49	67.286	68.542	49.217	88.919	29	86.03		Lrp5/6dKO	#1	34	29	16	79	26.3333	26.3333	26.3333	79	2.23207	0.270042	4.05485	6.55696	0.05-0.02	*
	85.426	61.526	50.389	88.781	86.058	15.541	32.61	61.26	56.47		BKO		46	31	34	111	37	37	37	111	2.18919	0.972973	0.243243	3.40541	0.5-0.3	ns
	0.365	3.935	67.547	37.593	26.157	3.851	40.185	70.35	21.31		Lrp5KO	#2	62	111	57	230	76.6667	76.6667	76.6667	230	2.8058	15.3754	5.04493	23.2261	<0.001	***
	4.232	87.39	50.541	23.009	21.125	12.795	34.1	18.8	9.68		Lrp6KO	#2	29	19	19	67	22.3333	22.3333	22.3333	67	1.99005	0.497512	0.497512	2.98508	0.3-0.2	ns
	0.838	75.716	51.159	6.205	32.763	80.838	52.12	38.71	22.02		Lrp5/6dKO	#2	72	105	29	206	68.6667	68.6667	68.6667	206	0.161812	19.2249	22.9142	42.301	<0.001	***
	17.629	80.042	38.781	43.337	45.847	12.344	76.273	30.06	11.6
	42.436	16.607	45.574	32.125	24.717	16.937	35.838	34.781	42.23
	1.79	80.789	73.855	4.73	10.061	31.617	27.112	14.651	29.03
	3.073	26.565	49.414	27.031	56.754	70.994	31.802	20.383	20.14
	45.056	62.698	27.646	35.272	36.579	66.049	42.118	80.509	85.61
	43.014	43.007	60.798	60.686	0.522	58.846	62.569	22.07	56.47
	35.874	50.305	33.69	30.563	34.344	1.51	16.352	45.865	44.07
	19.305	43.461	30.964	83.757	14.25	1.975	22.333	12.242	44.62
	67.15	17.051	14.841	56.449	45.426	42.985	79.278	15.653	46.1
	77.687	27.652	73.768	8.448	2.603	89.327	73.971	34.475	43.22
	30.91	23.148	7.955	0.846	13.392	55.383	13.358	65.469	51.01
	35.426	50.293	25.346	87.141	23.962	73.488	45.525	1.821	49.7
	37.185	24.913	25.785	49.247	57.095	26.117	88.556	24.215	49.41
	36.384	48.589	22.932	29.627	36.61	55.868	39.753	73.822	41.39
	49.367	30.964	74.055	2.473	56.198	54.162	43.711	2.015	89.41
	3.664	89.19	6.546	86.108	67.404	59.036	33.52	18.273	21.9
	10.477	14.036	6.145	31.986	31.496	8.973	48.274	39.296	43.99
	89.431	53.83	30.923	1.165	45.426	2.726	15.082	71.532	53.49
	32.451	38.339	10.607	35.574	87.104	52.807	62.915	5.286	22.22
	86.186	53.412	83.361	36.474	61.382	11.581	15.267	51.891	47.05
	9.333	76.421	17.238	87.419	7.103	23.405	1.054	6.995	24.36
	87.825	54.954	11.31	55.291	28.337	63.392	37.776	61.098	43.02
	82.459	5.189	21.801	10.708	48.193	35.736	38.429	77.634	41.56
	52.662	87.909	50.906	28.443	39.906	86.944	55.787	22.161	7.82
	75.403	83.636	25.71	59.511	16.928	59.062	67.286	26.2	42.72
	88.57	20.556	30.018	83.298	25.174	16.991	2.632	48.013	49.1
	30.784	81.422	24.287	61.491	14.21	51.878	10.298	67.596	32.47
	32.318	84.472	78.176	46.972	5.528	7.847	33.847	3.417	63.4
	45	85.61	77.574	13.183	13.496	11.182	85.26	57.929	50.24
	41.269	3.563	37.221	27.646	5.305	23.362	8.305	45.239	41.57
	0.248	1.55	3.118	29.716	21.93	29.249	30.94	41.496	33.31
	86.477	2.263	7.651	40.875	22.655	13.585	4.543	40.069	80.74
	52.53	71.049	6.216	30.895	34.334	21.161	8.501	26.565	70.28
	78.49	17.021	84.051	1.013	45.393	40.433	55.796	67.202	56.19
	24.28	19.44	0.666	70.423	81.674	82.36	55.923	37.82	86.1
	43.999	58.312	23.171	31.819	18.913	17.546	25.87		70.05
	73.351	54.41	62.758	38.606	79.667	22.139	65.522		42.069
	74.476	23.552	16.73	17.7	15.781	19.29	24.322		23.973
	78.93	26.348	41.76	1.647	32.919	11.849	32.913		47.558
	25.335	7.009		5.932	53.495	0.961	80.941		25.56
	44.225	2.617			13.183	83.418	65.576		20.225
	55.923	37.405			15.255	1.349	57.913		43.059
	70.56	8.259			13.392	43.603	43.76		24.956
	79.702	78.566			83.337	0.387	83.418		20.729
	62.991	39.973			63.479	3.545	24.102		51.52
	80.721	29.912			15.725	70.017	10.993		43.488
	10.125	85.758			50.86	40.112	52.928		39.862
	85.478	2.49				61.667	48.013		9.515
	80.518	88.152				72.195	40.601		23.549
	4.926	53.531				55.582	74.805		73.124
	58.738	84.85				9.462	66.531		33.69
	21.925	50.44				78.074	66.047		12.674
	36.439	38.71				16.352	35.074		56.905
	88.178	16.737				72.23	57.879		64.898
	35.569	0.742				52.691	29.991		49.112
	59.744	90				87.689	29.022		33.007
	51.92	60.81				62.819	75.541		14.744
	57.051	3.143				85.878	25.096		43.586
	61.26	17.969				10.867	48.504		29.534
	67.491	2.862				34.659	30.661		40.765
	23.095	1.848				54.462	47.936		25.55
	29.609	89.263				81.664	54.047		65.48
	75.923	65.376				86.417	61.374		24.648
	29.269	86.505				12.529	86.692		57.33
	65.772	39.065				29.231	63.739		27.651
	50.073	17.053				78.111	60.769		23.009
	68.89	7.261				73.142	51.704		51.087
	73.351	32.995				72.614	80.72		73.014
	87.825	20.772				20.502	86.188		37.368
	90	42.879				46.919	47.981		36.462
	88.668					73.036	25.358		11.334
	86.809					51.494	50.192		50.716
	87.797					78.366	73.256		41.1
	43.636					67.425	34.862		17.819
	89.825					16.161	18.435		83.502
	72.557					71.741	85.764		50.914
	48.814					48.814	5.149		40.888
	35.676					22.166	39.838		30.651
	71.908					84.162	62.941		21.479
	87.38						41.945		36.222
	45.723						40.783		42.532
	79.249						5.586		16.303
	84.615						54.162		38.66
	48.814						62.124		35.344
	72.41						38.186		90
	42.788						70.435		71.012
	84.71						86.129		5.072
	20.81						57.018		28.454
	4.924						20.469		32.547
	64.983						69.787		31.159
	35.538						50.217		59.196
	85.337						74.155		11.53
	41.918						44.106		22.124
	74.974						17.91		47.749
	19.402						87.798		59.603
	84.053						31.658		5.979
	69.173						42.732		58.841
	90						10.002		46.647
	11.707						81.915		20.917
	87.663						43.547		5.621
	30.361						37.173		16.424
	30.579						75.174		82.405
	26.403						53.933		33.072
	68.99						29.518		37.671
	51.116						47.628		16.848
	76.759						29.227		42.069
	62.909						23.104		23.973
	41.94						17.518		47.558
	64.125						49.349		25.56
	26.232						40.309		20.225
	88.668						46.693		43.059
	25.823						48.015		24.956
	75.919						53.241		20.729
	73.023						15.132		51.52
	45.982						43.624		43.488
	66.455						28.515		39.862
	79.395						54.502		9.515
	60.977						45.247		23.549
	17.103						61.683		73.124
	0						54.232		33.69
	50.003						64.159		12.674
	77.296						22.965		56.905
	69.952						56.094		64.898
	30.51						24.019		49.112
	80.898						48.221		33.007
	67.13						50.323		14.744
	26.03						61.609		43.586
	26.952						51.815		29.534
	80.748						50.605		40.765
	70.858						47.726		25.55
	86.878						65.287		65.48
	31.996						49.211		24.648
	47.726						75.559		57.33
	63.039						18.668		27.651
	83.555						27.784		23.009
	67.508						32.97		51.087
	49.23						45.673		73.014
	86.934						48.572		37.368
							48.289		36.462
							44.592		11.334
							8.022		50.716
							22.312		41.1
							58.15		17.819
							15.977		83.502
							15.359		50.914
							74.723		40.888
							34.845		30.651
							25.749		21.479
							30.735		36.222
							20.802		42.532
							24.82		16.303
							82.286		38.66
							65.12		35.344
							50.337		90
							77.734		71.012
							37.502		5.072
							46.948		28.454
							61.851		32.547
							32.104		31.159
							37.192		59.196
							26.991		11.53
							14.036		22.124
							42.917		47.749
							44.609		59.603
							42.839		5.979
							55.67		58.841
							59.602		46.647
							41.723		20.917
							23.306		5.621
							81.837		16.424
							38.826		82.405
							61.498		33.072
							44.395		37.671
							56.167		16.848
							63.806
							25.985
							60.837
							84.061
							42.297
							27.109
							70.889
							43.506
							37.515
							38.533
							43.381
							25.359
							47.134
							24.91
							7.44
							23.564
							27.509
							43.564
							57.014
							46.563
							41.1
							73.668
							46.219
							42.344
Count	170	102	71	72	79	111	230	67	206
