# Supplementary material for: Wnt- and glutamate-receptors orchestrate stem cell dynamics and asymmetric cell division
Source: eLife. 2021 May 24;10:e59791. doi: 10.7554/eLife.59791 (PMC8177892; doi:10.7554/eLife.59791)
Supplement: Figure 9—source data 1. [file elife-59791-fig9-data1.xlsx]

## Sheet: Figure 9
Panel B
Nanog ACD	WT (Wnt3a)										WT (iWnt3a)										Lrp5KO (#1)										Lrp5KO (#2)										Lrp6KO (#1)
Prox (#)	8	16	10	18	20	16	19	21	19		8	5	8	10							10	11	9								16	17	11	17							7	7	6	5
Distributed (#)	5	8	10	13	6	7	5	8	6		17	19	9	13							7	9	7								7	9	14	10							11	17	13	15
Distal (#)	5	3	4	15	6	7	9	2	5		5	6	11	9							9	5	6								10	4	6	3							7	2	8	7
Total doublets (#)	18	27	24	46	32	30	33	31	30		30	30	28	32							26	25	22								33	30	31	30							25	26	27	27
Proximal	44.4444	59.2593	41.6667	39.1304	62.5	53.3333	57.5758	67.7419	63.3333		26.6667	16.6667	28.5714	31.25							38.4615	44	40.9091								48.4848	56.6667	35.4839	56.6667							28	26.9231	22.2222	18.5185
Distributed	27.7778	29.6296	41.6667	28.2609	18.75	23.3333	15.1515	25.8065	20		56.6667	63.3333	32.1429	40.625							26.9231	36	31.8182								21.2121	30	45.1613	33.3333							44	65.3846	48.1481	55.5556
Distal	27.7778	11.1111	16.6667	32.6087	18.75	23.3333	27.2727	6.45161	16.6667		16.6667	20	39.2857	28.125							34.6154	20	27.2727								30.303	13.3333	19.3548	10							28	7.69231	29.6296	25.9259
Two-way ANOVA	Ordinary						Number of families	3
Alpha	0.05						Number of comparisons per family	8
							Alpha	0.05
Source of Variation	% of total variation	P value	P value summary	Significant?
Interaction	48.75	<0.0001	****	Yes			Dunnett's multiple comparisons test	Predicted (LS) mean diff.	95.00% CI of diff.	Below threshold?	Summary	Adjusted P Value		Test details	Predicted (LS) mean 1	Predicted (LS) mean 2	Predicted (LS) mean diff.	SE of diff.	N1	N2	q	DF
Row Factor	27.82	<0.0001	****	Yes
Column Factor	9.595e-14	>0.9999	ns	No			Proximal							Proximal
							WT (Wnt3a) vs. WT (iWnt3a)	28.54	13.26 to 43.83	Yes	****	<0.0001		WT (Wnt3a) vs. WT (iWnt3a)	54.33	25.79	28.54	5.526	9	4	5.166	87
ANOVA table	SS (Type III)	DF	MS	F (DFn, DFd)	P value		WT (Wnt3a) vs. Lrp5KO (#1)	13.21	-3.747 to 30.16	No	ns	0.2144		WT (Wnt3a) vs. Lrp5KO (#1)	54.33	41.12	13.21	6.13	9	3	2.155	87
Interaction	14579	16	911.2	F (16, 87) = 10.78	P<0.0001		WT (Wnt3a) vs. Lrp5KO (#2)	5.006	-10.28 to 20.29	No	ns	0.9592		WT (Wnt3a) vs. Lrp5KO (#2)	54.33	49.33	5.006	5.526	9	4	0.906	87
Row Factor	8320	2	4160	F (2, 87) = 49.20	P<0.0001		WT (Wnt3a) vs. Lrp6KO (#1)	30.42	15.13 to 45.70	Yes	****	<0.0001		WT (Wnt3a) vs. Lrp6KO (#1)	54.33	23.92	30.42	5.526	9	4	5.504	87
Column Factor	2.869e-11	8	3.587e-12	F (8, 87) = 4.242e-014	P>0.9999		WT (Wnt3a) vs. Lrp6KO (#2)	20.94	3.985 to 37.90	Yes	**	0.0075		WT (Wnt3a) vs. Lrp6KO (#2)	54.33	33.39	20.94	6.13	9	3	3.416	87
Residual	7356	87	84.55				WT (Wnt3a) vs. Lrp5/6dKO (#1)	30.12	13.17 to 47.08	Yes	****	<0.0001		WT (Wnt3a) vs. Lrp5/6dKO (#1)	54.33	24.21	30.12	6.13	9	3	4.914	87
							WT (Wnt3a) vs. Lrp5/6dKO (#2)	22.04	6.757 to 37.32	Yes	**	0.0011		WT (Wnt3a) vs. Lrp5/6dKO (#2)	54.33	32.29	22.04	5.526	9	4	3.989	87
Data summary							WT (Wnt3a) vs. BKO	35.94	20.66 to 51.22	Yes	****	<0.0001		WT (Wnt3a) vs. BKO	54.33	18.39	35.94	5.526	9	4	6.504	87
Number of columns (Column Factor)	9
Number of rows (Row Factor)	3						Distributed							Distributed
Number of values	114						WT (Wnt3a) vs. WT (iWnt3a)	-22.59	-37.88 to -7.311	Yes	***	0.0008		WT (Wnt3a) vs. WT (iWnt3a)	25.6	48.19	-22.59	5.526	9	4	4.089	87
							WT (Wnt3a) vs. Lrp5KO (#1)	-5.983	-22.94 to 10.97	No	ns	0.9391		WT (Wnt3a) vs. Lrp5KO (#1)	25.6	31.58	-5.983	6.13	9	3	0.976	87
							WT (Wnt3a) vs. Lrp5KO (#2)	-6.829	-22.11 to 8.454	No	ns	0.8161		WT (Wnt3a) vs. Lrp5KO (#2)	25.6	32.43	-6.829	5.526	9	4	1.236	87
							WT (Wnt3a) vs. Lrp6KO (#1)	-27.67	-42.96 to -12.39	Yes	****	<0.0001		WT (Wnt3a) vs. Lrp6KO (#1)	25.6	53.27	-27.67	5.526	9	4	5.008	87
							WT (Wnt3a) vs. Lrp6KO (#2)	-10.75	-27.70 to 6.209	No	ns	0.4461		WT (Wnt3a) vs. Lrp6KO (#2)	25.6	36.34	-10.75	6.13	9	3	1.753	87
							WT (Wnt3a) vs. Lrp5/6dKO (#1)	-41.6	-58.55 to -24.64	Yes	****	<0.0001		WT (Wnt3a) vs. Lrp5/6dKO (#1)	25.6	67.19	-41.6	6.13	9	3	6.785	87
							WT (Wnt3a) vs. Lrp5/6dKO (#2)	-17.79	-33.07 to -2.505	Yes	*	0.0137		WT (Wnt3a) vs. Lrp5/6dKO (#2)	25.6	43.39	-17.79	5.526	9	4	3.219	87
							WT (Wnt3a) vs. BKO	-34.11	-49.39 to -18.82	Yes	****	<0.0001		WT (Wnt3a) vs. BKO	25.6	59.7	-34.11	5.526	9	4	6.172	87
							Distal							Distal
							WT (Wnt3a) vs. WT (iWnt3a)	-5.948	-21.23 to 9.335	No	ns	0.9006		WT (Wnt3a) vs. WT (iWnt3a)	20.07	26.02	-5.948	5.526	9	4	1.077	87
							WT (Wnt3a) vs. Lrp5KO (#1)	-7.225	-24.18 to 9.730	No	ns	0.8495		WT (Wnt3a) vs. Lrp5KO (#1)	20.07	27.3	-7.225	6.13	9	3	1.179	87
							WT (Wnt3a) vs. Lrp5KO (#2)	1.823	-13.46 to 17.11	No	ns	0.9996		WT (Wnt3a) vs. Lrp5KO (#2)	20.07	18.25	1.823	5.526	9	4	0.3299	87
							WT (Wnt3a) vs. Lrp6KO (#1)	-2.741	-18.02 to 12.54	No	ns	0.9979		WT (Wnt3a) vs. Lrp6KO (#1)	20.07	22.81	-2.741	5.526	9	4	0.4961	87
							WT (Wnt3a) vs. Lrp6KO (#2)	-10.19	-27.15 to 6.762	No	ns	0.5107		WT (Wnt3a) vs. Lrp6KO (#2)	20.07	30.26	-10.19	6.13	9	3	1.663	87
							WT (Wnt3a) vs. Lrp5/6dKO (#1)	11.47	-5.481 to 28.43	No	ns	0.367		WT (Wnt3a) vs. Lrp5/6dKO (#1)	20.07	8.596	11.47	6.13	9	3	1.872	87
							WT (Wnt3a) vs. Lrp5/6dKO (#2)	-4.252	-19.54 to 11.03	No	ns	0.9846		WT (Wnt3a) vs. Lrp5/6dKO (#2)	20.07	24.32	-4.252	5.526	9	4	0.7695	87
							WT (Wnt3a) vs. BKO	-1.834	-17.12 to 13.45	No	ns	0.9996		WT (Wnt3a) vs. BKO	20.07	21.9	-1.834	5.526	9	4	0.3319	87
Panel C
Rex1 ACD	WT (Wnt3a)											WT (iWnt3a)											Lrp5KO (#1)											Lrp5KO (#2)											Lrp6KO (#1)
Prox (#)	15	12	12	11	12	11	13	15	19	23	20	5	4	2	12								13	12	12	10								10	18	11	19								10	10	5
Distributed (#)	9	9	10	5	7	6	15	11	10	7	4	22	19	16	12								4	5	5	9								20	10	15	8								11	14	14
Distal (#)	2	5	2	2	3	5	4	4	4	1	5	3	7	10	8								4	5	3	4								3	2	5	3								6	5	5
Total doublets (#)	26	26	24	18	22	22	32	30	33	31	29	30	30	28	32								21	22	20	23								33	30	31	30								27	29	24
Proximal	57.6923	46.1538	50	61.1111	54.5455	50	40.625	50	57.5758	74.1935	68.9655	16.6667	13.3333	7.14286	37.5								61.9048	54.5455	60	43.4783								30.303	60	35.4839	63.3333								37.037	34.4828	20.8333
Distributed	34.6154	34.6154	41.6667	27.7778	31.8182	27.2727	46.875	36.6667	30.303	22.5806	13.7931	73.3333	63.3333	57.1429	37.5								19.0476	22.7273	25	39.1304								60.6061	33.3333	48.3871	26.6667								40.7407	48.2759	58.3333
Distal	7.69231	19.2308	8.33333	11.1111	13.6364	22.7273	12.5	13.3333	12.1212	3.22581	17.2414	10	23.3333	35.7143	25								19.0476	22.7273	15	17.3913								9.09091	6.66667	16.129	10								22.2222	17.2414	20.8333
Two-way ANOVA	Ordinary						Number of families	3
Alpha	0.05						Number of comparisons per family	8
							Alpha	0.05
Source of Variation	% of total variation	P value	P value summary	Significant?
Interaction	40.33	<0.0001	****	Yes			Dunnett's multiple comparisons test	Predicted (LS) mean diff.	95.00% CI of diff.	Below threshold?	Summary	Adjusted P Value		Test details	Predicted (LS) mean 1	Predicted (LS) mean 2	Predicted (LS) mean diff.	SE of diff.	N1	N2	q	DF
Row Factor	33.64	<0.0001	****	Yes
Column Factor	1.33e-13	>0.9999	ns	No			Proximal							Proximal
							WT (Wnt3a) vs. WT (iWnt3a)	36.87	20.57 to 53.17	Yes	****	<0.0001		WT (Wnt3a) vs. WT (iWnt3a)	55.53	18.66	36.87	5.894	11	4	6.256	96
ANOVA table	SS (Type III)	DF	MS	F (DFn, DFd)	P value		WT (Wnt3a) vs. Lrp5KO (#1)	0.5508	-15.75 to 16.85	No	ns	>0.9999		WT (Wnt3a) vs. Lrp5KO (#1)	55.53	54.98	0.5508	5.894	11	4	0.09346	96
Interaction	19102	16	1194	F (16, 96) = 11.72	P<0.0001		WT (Wnt3a) vs. Lrp5KO (#2)	8.253	-8.047 to 24.55	No	ns	0.7153		WT (Wnt3a) vs. Lrp5KO (#2)	55.53	47.28	8.253	5.894	11	4	1.4	96
Row Factor	15936	2	7968	F (2, 96) = 78.20	P<0.0001		WT (Wnt3a) vs. Lrp6KO (#1)	24.75	6.565 to 42.93	Yes	**	0.0023		WT (Wnt3a) vs. Lrp6KO (#1)	55.53	30.78	24.75	6.575	11	3	3.764	96
Column Factor	6.299e-11	8	7.874e-12	F (8, 96) = 7.728e-014	P>0.9999		WT (Wnt3a) vs. Lrp6KO (#2)	25.63	9.327 to 41.93	Yes	***	0.0003		WT (Wnt3a) vs. Lrp6KO (#2)	55.53	29.91	25.63	5.894	11	4	4.348	96
Residual	9782	96	101.9				WT (Wnt3a) vs. Lrp5/6dKO (#1)	15.63	-2.549 to 33.82	No	ns	0.1329		WT (Wnt3a) vs. Lrp5/6dKO (#1)	55.53	39.9	15.63	6.575	11	3	2.378	96
							WT (Wnt3a) vs. Lrp5/6dKO (#2)	30.59	14.29 to 46.88	Yes	****	<0.0001		WT (Wnt3a) vs. Lrp5/6dKO (#2)	55.53	24.95	30.59	5.894	11	4	5.189	96
Data summary							WT (Wnt3a) vs. BKO	34.19	17.89 to 50.49	Yes	****	<0.0001		WT (Wnt3a) vs. BKO	55.53	21.34	34.19	5.894	11	4	5.802	96
Number of columns (Column Factor)	9
Number of rows (Row Factor)	3						Distributed							Distributed
Number of values	123						WT (Wnt3a) vs. WT (iWnt3a)	-26.19	-42.49 to -9.893	Yes	***	0.0002		WT (Wnt3a) vs. WT (iWnt3a)	31.63	57.83	-26.19	5.894	11	4	4.444	96
							WT (Wnt3a) vs. Lrp5KO (#1)	5.159	-11.14 to 21.46	No	ns	0.9688		WT (Wnt3a) vs. Lrp5KO (#1)	31.63	26.48	5.159	5.894	11	4	0.8753	96
							WT (Wnt3a) vs. Lrp5KO (#2)	-10.61	-26.91 to 5.687	No	ns	0.4209		WT (Wnt3a) vs. Lrp5KO (#2)	31.63	42.25	-10.61	5.894	11	4	1.801	96
							WT (Wnt3a) vs. Lrp6KO (#1)	-17.48	-35.67 to 0.7016	No	ns	0.0664		WT (Wnt3a) vs. Lrp6KO (#1)	31.63	49.12	-17.48	6.575	11	3	2.659	96
							WT (Wnt3a) vs. Lrp6KO (#2)	-16.57	-32.87 to -0.2708	Yes	*	0.0441		WT (Wnt3a) vs. Lrp6KO (#2)	31.63	48.21	-16.57	5.894	11	4	2.812	96
							WT (Wnt3a) vs. Lrp5/6dKO (#1)	-2.149	-20.33 to 16.03	No	ns	0.9996		WT (Wnt3a) vs. Lrp5/6dKO (#1)	31.63	33.78	-2.149	6.575	11	3	0.3269	96
							WT (Wnt3a) vs. Lrp5/6dKO (#2)	-23.83	-40.13 to -7.534	Yes	***	0.0008		WT (Wnt3a) vs. Lrp5/6dKO (#2)	31.63	55.47	-23.83	5.894	11	4	4.044	96
							WT (Wnt3a) vs. BKO	-44.53	-60.83 to -28.23	Yes	****	<0.0001		WT (Wnt3a) vs. BKO	31.63	76.16	-44.53	5.894	11	4	7.555	96
							Distal							Distal
							WT (Wnt3a) vs. WT (iWnt3a)	-10.68	-26.98 to 5.620	No	ns	0.4131		WT (Wnt3a) vs. WT (iWnt3a)	12.83	23.51	-10.68	5.894	11	4	1.812	96
							WT (Wnt3a) vs. Lrp5KO (#1)	-5.709	-22.01 to 10.59	No	ns	0.9452		WT (Wnt3a) vs. Lrp5KO (#1)	12.83	18.54	-5.709	5.894	11	4	0.9687	96
							WT (Wnt3a) vs. Lrp5KO (#2)	2.36	-13.94 to 18.66	No	ns	0.9995		WT (Wnt3a) vs. Lrp5KO (#2)	12.83	10.47	2.36	5.894	11	4	0.4005	96
							WT (Wnt3a) vs. Lrp6KO (#1)	-7.267	-25.45 to 10.92	No	ns	0.8934		WT (Wnt3a) vs. Lrp6KO (#1)	12.83	20.1	-7.267	6.575	11	3	1.105	96
							WT (Wnt3a) vs. Lrp6KO (#2)	-9.056	-25.36 to 7.244	No	ns	0.6145		WT (Wnt3a) vs. Lrp6KO (#2)	12.83	21.89	-9.056	5.894	11	4	1.537	96
							WT (Wnt3a) vs. Lrp5/6dKO (#1)	-13.48	-31.67 to 4.698	No	ns	0.2684		WT (Wnt3a) vs. Lrp5/6dKO (#1)	12.83	26.32	-13.48	6.575	11	3	2.051	96
							WT (Wnt3a) vs. Lrp5/6dKO (#2)	-6.751	-23.05 to 9.549	No	ns	0.8739		WT (Wnt3a) vs. Lrp5/6dKO (#2)	12.83	19.58	-6.751	5.894	11	4	1.146	96
							WT (Wnt3a) vs. BKO	10.33	-5.968 to 26.63	No	ns	0.4541		WT (Wnt3a) vs. BKO	12.83	2.5	10.33	5.894	11	4	1.753	96
Panel D
Sox2 ACD	WT (Wnt3a)											WT (iWnt3a)											Lrp5KO (#2)											Lrp6KO (#2)											Lrp5/6dKO (#2)
Prox (#)	20	15	18	25	22							7	6	8	10								15	18	16	17								11	10	11	15								7	11	15	7
Distributed (#)	8	8	7	4	3							17	16	8	14								13	8	8	7								14	11	10	8								17	17	7	16
Distal (#)	4	7	8	2	5							6	8	12	8								5	4	7	6								7	10	9	8								8	4	8	7
Total doublets (#)	32	30	33	31	30							30	30	28	32								33	30	31	30								32	31	30	31								32	32	30	30
Proximal	62.5	50	54.5455	80.6452	73.3333							23.3333	20	28.5714	31.25								45.4545	60	51.6129	56.6667								34.375	32.2581	36.6667	48.3871								21.875	34.375	50	23.3333
Distributed	25	26.6667	21.2121	12.9032	10							56.6667	53.3333	28.5714	43.75								39.3939	26.6667	25.8065	23.3333								43.75	35.4839	33.3333	25.8065								53.125	53.125	23.3333	53.3333
Distal	12.5	23.3333	24.2424	6.45161	16.6667							20	26.6667	42.8571	25								15.1515	13.3333	22.5806	20								21.875	32.2581	30	25.8065								25	12.5	26.6667	23.3333
Two-way ANOVA	Ordinary						Number of families	3
Alpha	0.05						Number of comparisons per family	4
							Alpha	0.05
Source of Variation	% of total variation	P value	P value summary	Significant?
Interaction	44.92	<0.0001	****	Yes			Dunnett's multiple comparisons test	Predicted (LS) mean diff.	95.00% CI of diff.	Below threshold?	Summary	Adjusted P Value		Test details	Predicted (LS) mean 1	Predicted (LS) mean 2	Predicted (LS) mean diff.	SE of diff.	N1	N2	q	DF
Row Factor	27.04	<0.0001	****	Yes
Column Factor	1.474e-13	>0.9999	ns	No			Proximal							Proximal
							WT (Wnt3a) vs. WT (iWnt3a)	38.42	22.96 to 53.87	Yes	****	<0.0001		WT (Wnt3a) vs. WT (iWnt3a)	64.2	25.79	38.42	6.086	5	4	6.312	48
ANOVA table	SS (Type III)	DF	MS	F (DFn, DFd)	P value		WT (Wnt3a) vs. Lrp5KO (#2)	10.77	-4.681 to 26.22	No	ns	0.2508		WT (Wnt3a) vs. Lrp5KO (#2)	64.2	53.43	10.77	6.086	5	4	1.77	48
Interaction	7218	8	902.2	F (8, 48) = 10.96	P<0.0001		WT (Wnt3a) vs. Lrp6KO (#2)	26.28	10.83 to 41.74	Yes	***	0.0003		WT (Wnt3a) vs. Lrp6KO (#2)	64.2	37.92	26.28	6.086	5	4	4.318	48
Row Factor	4344	2	2172	F (2, 48) = 26.39	P<0.0001		WT (Wnt3a) vs. Lrp5/6dKO (#2)	31.81	16.36 to 47.26	Yes	****	<0.0001		WT (Wnt3a) vs. Lrp5/6dKO (#2)	64.2	32.4	31.81	6.086	5	4	5.226	48
Column Factor	2.368e-11	4	5.92e-12	F (4, 48) = 7.192e-014	P>0.9999
Residual	3951	48	82.32				Distributed							Distributed
							WT (Wnt3a) vs. WT (iWnt3a)	-26.42	-41.88 to -10.97	Yes	***	0.0003		WT (Wnt3a) vs. WT (iWnt3a)	19.16	45.58	-26.42	6.086	5	4	4.342	48
Data summary							WT (Wnt3a) vs. Lrp5KO (#2)	-9.644	-25.10 to 5.809	No	ns	0.3434		WT (Wnt3a) vs. Lrp5KO (#2)	19.16	28.8	-9.644	6.086	5	4	1.585	48
Number of columns (Column Factor)	5						WT (Wnt3a) vs. Lrp6KO (#2)	-15.44	-30.89 to 0.01571	No	ns	0.0503		WT (Wnt3a) vs. Lrp6KO (#2)	19.16	34.59	-15.44	6.086	5	4	2.536	48
Number of rows (Row Factor)	3						WT (Wnt3a) vs. Lrp5/6dKO (#2)	-26.57	-42.03 to -11.12	Yes	***	0.0003		WT (Wnt3a) vs. Lrp5/6dKO (#2)	19.16	45.73	-26.57	6.086	5	4	4.366	48
Number of values	63
							Distal							Distal
							WT (Wnt3a) vs. WT (iWnt3a)	-11.99	-27.44 to 3.461	No	ns	0.1723		WT (Wnt3a) vs. WT (iWnt3a)	16.64	28.63	-11.99	6.086	5	4	1.97	48
							WT (Wnt3a) vs. Lrp5KO (#2)	-1.128	-16.58 to 14.33	No	ns	0.9991		WT (Wnt3a) vs. Lrp5KO (#2)	16.64	17.77	-1.128	6.086	5	4	0.1853	48
							WT (Wnt3a) vs. Lrp6KO (#2)	-10.85	-26.30 to 4.607	No	ns	0.2454		WT (Wnt3a) vs. Lrp6KO (#2)	16.64	27.48	-10.85	6.086	5	4	1.782	48
							WT (Wnt3a) vs. Lrp5/6dKO (#2)	-5.236	-20.69 to 10.22	No	ns	0.8166		WT (Wnt3a) vs. Lrp5/6dKO (#2)	16.64	21.88	-5.236	6.086	5	4	0.8603	48
