# Supplementary material for: Wnt- and glutamate-receptors orchestrate stem cell dynamics and asymmetric cell division
Source: eLife. 2021 May 24;10:e59791. doi: 10.7554/eLife.59791 (PMC8177892; doi:10.7554/eLife.59791)
Supplement: Figure 10—source data 1. [file elife-59791-fig10-data1.xlsx]

## Sheet: Figure 10
Panel C
	Lrp6OE - GFP+	Lrp6 OE - GFP-		Lrp6OE - GFP+			WT + Wnt3a			WT + Wnt3a
	23.429	36.674		vs.			vs.			vs.
	22.62	61.364		Lrp6 OE - GFP-			Lrp6OE - GFP+			Lrp6 OE - GFP-
	11.592	38.237
	51.691	46.682		Kolmogorov-Smirnov test			Kolmogorov-Smirnov test			Kolmogorov-Smirnov test
	77.905	27.351		P value	0.3895		P value	0.0005		P value	<0.0001
	7.619	31.728		Exact or approximate P value?	Approximate		Exact or approximate P value?	Approximate		Exact or approximate P value?	Approximate
	56.745	36.57		P value summary	ns		P value summary	***		P value summary	****
	87.532	45		Significantly different (P < 0.05)?	No		Significantly different (P < 0.05)?	Yes		Significantly different (P < 0.05)?	Yes
	28.115	86.444		Kolmogorov-Smirnov D	0.1578		Kolmogorov-Smirnov D	0.2912		Kolmogorov-Smirnov D	0.3295
	30.877	18.435
	1.975	39.596
	40.153	39.802				Counts				Expected randomised distribution				Chi squared
	52.116	61.649		Cell line	clone	0-30	30-60	60-90	total	expected 0-30	expected 30-60	expected 60-90	total	0-30	30-60	60-90	Sum	p-value (2 df)	Stars
	65.109	57.125		Lrp6OE	GFP+	20	30	18	68	22.6667	22.6667	22.6667	68	0.313725	2.37255	0.960784	3.64706	0.3-0.2	ns
	3.017	19.077		Lrp6 OE	GFP-	22	28	13	63	21	21	21	63	0.047619	2.33333	3.04762	5.42857	0.1-0.05	ns
	42.113	35.07
	78.631	20.989
	34.909	34.992
	31.239	39.611
	30.401	32.339
	74.501	31.945
	90	9.872
	61.567	84.416
	78.847	66.026
	44.1	27.576
	45.331	44.256
	60.068	16.972
	1.759	51.09
	64.564	88.283
	5.618	62.319
	16.106	1.662
	29.982	49.075
	85.813	49.988
	41.07	63.086
	55.388	29.327
	30.52	82.326
	57.813	28.423
	61.928	7.976
	33.224	32.953
	33.486	59.851
	57.291	89.215
	48.141	1.221
	18.884	24.775
	36.293	25.141
	42.725	52.674
	55.305	86.121
	29.115	52.529
	70.159	58.014
	44.404	10.52
	56.28	4.399
	64.565	37.569
	28.453	21.819
	20.588	74.687
	45.847	23.009
	8.701	78.818
	59.167	50.563
	85.601	22.349
	39.144	43.877
	22.515	16.287
	1.577	47.787
	6.112	26.436
	85.22	38.036
	7.722	14.931
	54.481
	55.717
	84.428
	60.83
	58.995
Counts	68	63
Panel E
Sox2 ACD	GFP+			GFP-				Two-way ANOVA	Ordinary						Number of families	1
Prox (#)	14	11	12	8	3	3		Alpha	0.05						Number of comparisons per family	3
Distributed (#)	10	9	9	14	19	20									Alpha	0.05
Distal (#)	6	10	9	8	7	6		Source of Variation	% of total variation	P value	P value summary	Significant?
Total doublets (#)	30	30	30	30	29	29		Interaction	52.59	0.0001	***	Yes			Šídák's multiple comparisons test	Mean Diff.	95.00% CI of diff.	Below threshold?	Summary	Adjusted P Value
Proximal	46.6667	36.6667	40	26.6667	10.3448	10.3448		Row Factor	32.61	0.0009	***	Yes
Distributed	33.3333	30	30	46.6667	65.5172	68.9655		Column Factor	1.289e-13	>0.9999	ns	No			GFP+ - GFP-
Distal	20	33.3333	30	26.6667	24.1379	20.6897									Proximal	25.33	8.816 to 41.84	Yes	**	0.0034
								ANOVA table	SS	DF	MS	F (DFn, DFd)	P value		Distributed	-29.27	-45.78 to -12.76	Yes	**	0.0011
								Interaction	2271	2	1135	F (2, 12) = 21.31	P=0.0001		Distal	3.946	-12.56 to 20.46	No	ns	0.8897
								Row Factor	1408	2	703.9	F (2, 12) = 13.21	P=0.0009
								Column Factor	5.567e-12	1	5.567e-12	F (1, 12) = 1.045e-013	P>0.9999
								Residual	639.3	12	53.28				Test details	Mean 1	Mean 2	Mean Diff.	SE of diff.	N1	N2	t	DF
								Difference between column means							GFP+ - GFP-
								Mean of GFP+	33.33						Proximal	41.11	15.79	25.33	5.96	3	3	4.25	12
								Mean of GFP-	33.33						Distributed	31.11	60.38	-29.27	5.96	3	3	4.912	12
								Difference between means	-1.112e-06						Distal	27.78	23.83	3.946	5.96	3	3	0.6622	12
								SE of difference	3.441
								95% CI of difference	-7.497 to 7.497
								Data summary
								Number of columns (Column Factor)	2
								Number of rows (Row Factor)	3
								Number of values	18
Panel F
Nanog ACD	GFP+			GFP-				Two-way ANOVA	Ordinary						Number of families	1
Prox (#)	14	12	12	8	7	8		Alpha	0.05						Number of comparisons per family	3
Distributed (#)	8	11	12	15	19	18									Alpha	0.05
Distal (#)	8	7	6	7	3	3		Source of Variation	% of total variation	P value	P value summary	Significant?
Total doublets (#)	30	30	30	30	29	29		Interaction	34.24	0.0001	***	Yes			Šídák's multiple comparisons test	Mean Diff.	95.00% CI of diff.	Below threshold?	Summary	Adjusted P Value
Proximal	46.6667	40	40	26.6667	24.1379	27.5862		Row Factor	56.12	<0.0001	****	Yes
Equal	26.6667	36.6667	40	50	65.5172	62.069		Column Factor	0	>0.9999	ns	No			GFP+ - GFP-
Distal	26.6667	23.3333	20	23.3333	10.3448	10.3448									Proximal	16.09	3.036 to 29.15	Yes	*	0.0153
								ANOVA table	SS	DF	MS	F (DFn, DFd)	P value		Distributed	-24.75	-37.81 to -11.70	Yes	***	0.0006
								Interaction	1420	2	709.9	F (2, 12) = 21.31	P=0.0001		Distal	8.659	-4.397 to 21.71	No	ns	0.249
								Row Factor	2328	2	1164	F (2, 12) = 34.93	P<0.0001
								Column Factor	0	1	0	F (1, 12) = 0.000	P>0.9999
								Residual	399.8	12	33.31				Test details	Mean 1	Mean 2	Mean Diff.	SE of diff.	N1	N2	t	DF
								Difference between column means							GFP+ - GFP-
								Mean of GFP+	33.33						Proximal	42.22	26.13	16.09	4.713	3	3	3.415	12
								Mean of GFP-	33.33						Distributed	34.44	59.2	-24.75	4.713	3	3	5.252	12
								Difference between means	0						Distal	23.33	14.67	8.659	4.713	3	3	1.837	12
								SE of difference	2.721
								95% CI of difference	-5.928 to 5.928
								Data summary
								Number of columns (Column Factor)	2
								Number of rows (Row Factor)	3
								Number of values	18
