# Supplementary material for: Wnt- and glutamate-receptors orchestrate stem cell dynamics and asymmetric cell division
Source: eLife. 2021 May 24;10:e59791. doi: 10.7554/eLife.59791 (PMC8177892; doi:10.7554/eLife.59791)
Supplement: Figure 11—source data 1. [file elife-59791-fig11-data1.xlsx]

## Sheet: Figure 11
Panel A
	A3/4dKO (#1)	A3/4dKO (#2)	K1/3dKO (#1)	K1/3dKO (#2)	CNQX		WT + Wnt3a			WT + Wnt3a			WT + Wnt3a			WT + Wnt3a			WT + Wnt3a
	42.274	2.663	56.101	64.983	19.6		vs.			vs.			vs.			vs.			vs.
	18.435	49.163	50.11	45.585	58.35		K1/3dKO (#1)			K1/3dKO (#2)			A3/4dKO (#1)			A3/4dKO (#2)			CNQX
	90	71.446	56.859	7.125	58.13
	26.565	30.53	63.538	30.069	3.23		Kolmogorov-Smirnov test			Kolmogorov-Smirnov test			Kolmogorov-Smirnov test			Kolmogorov-Smirnov test			Kolmogorov-Smirnov test
	68.629	38.911	34.887	13.241	74.76		P value	<0.0001		P value	<0.0001		P value	0.0017		P value	0.0031		P value	<0.0001
	49.764	50.72	22.932	48.122	7.68		Exact or approximate P value?	Approximate		Exact or approximate P value?	Approximate		Exact or approximate P value?	Approximate		Exact or approximate P value?	Approximate		Exact or approximate P value?	Approximate
	12.349	34.644	9.253	22.834	38.42		P value summary	****		P value summary	****		P value summary	**		P value summary	**		P value summary	****
	79.163	14.237	23.902	30.964	78.2		Significantly different (P < 0.05)?	Yes		Significantly different (P < 0.05)?	Yes		Significantly different (P < 0.05)?	Yes		Significantly different (P < 0.05)?	Yes		Significantly different (P < 0.05)?	Yes
	41.82	54.015	2.753	12.095	34.3		Kolmogorov-Smirnov D	0.2991		Kolmogorov-Smirnov D	0.3064		Kolmogorov-Smirnov D	0.2353		Kolmogorov-Smirnov D	0.2025		Kolmogorov-Smirnov D	0.29
	59.167	16.596	83.125	61.928	21.03
	63.435	76.769	24.799	56.602	61.09				Counts				Expected randomised distribution				Chi squared
	35.819	39.994	33.428	85.914	40.51		Cell line	clone	0-30	30-60	60-90	total	expected 0-30	expected 30-60	expected 60-90	total	0-30	30-60	60-90	Sum	p-value (2 df)	Stars
	66.038	55.305	56.936	65.925	66.49		A3/4dKO	#1	28	41	33	102	34	34	34	102	1.05882	1.44118	0.029412	2.52941	0.3-0.2	ns
	45.843	57.031	27.605	74.578	8.13		A3/4dKO	#2	40	62	45	147	49	49	49	147	1.65306	3.44898	0.326531	5.42857	0.1-0.05	ns
	46.941	36.254	84.907	15.018	38.45		K1/3dKO	#1	20	55	24	99	33	33	33	99	5.12121	14.6667	2.45454	22.2424	<0.001	***
	13.671	71.175	51.808	39.459	27		K1/3dKO	#2	67	84	44	195	65	65	65	195	0.061538	5.55385	6.78461	12.4	0.01-0.001	**
	83.66	21.409	78.275	58.707	69.12		CNQX		37	34	25	96	32	32	32	96	0.78125	0.125	1.53125	2.4375	0.3-0.2	ns
	44.569	82.3074	73.968	40.791	4.16
	62.996	32.905	6.002	34.066	59.91
	23.962	59.621	16.547	56.109	19.28
	29.604	1.035	17.7763	45	77.47
	18.435	76.587	12.341	48.863	65.24
	53.427	37.645	31.759	36.557	38.76
	66.448	75.565	53.784	74.101	78.27
	18.189	33.417	71.494	62.54	50.72
	84.806	72.976	45	31.535	57.03
	42.479	69.489	31.67	46.219	25.5
	83.29	25.443	22.239	31.163	12.46
	64.231	72.942	15.162	8.213	89.38
	17.613	84.987	48.873	43.152	19.63
	79.061	86.713	18.435	54.874	37.64
	45.9	38.721	2.456	85.236	76.95
	71.194	59.085	45.462	42.709	58.13
	16.876	25.987	27.943	55.989	32.72
	84.053	26.291	36.87	39.806	19.63
	10.305	55.395	61.639	47.49	51.64
	30.881	38.593	85.946	90	15.99
	41.186	18.835	52.395	47.873	56.84
	29.745	35.727	65.614	28.301	8.62
	33.559	28.624	36.157	19.68	69.3
	64.44	79.771	63.435	87.397	10.21
	45.634	82.112	52.23	32.005	50.83
	10.939	20.854	19.098	75.964	4.52
	53.83	0.47	47.513	34.992	10.12
	21.038	71.078	23.022	80.447	73.25
	48.968	61.917	46.072	42.149	57.77
	24.893	29.288	41.833	36.87	61.5
	23.962	4.777	9.019	32.869	56.08
	32.869	9.191	62.049	8.017	15.83
	8.13	43.545	1.066	43.182	69.27
	34.43	52.028	56.43	18.435	15.61
	39.732	83.337	84.584	58.314	58.9
	65.225	52.411	0	34.695	40.78
	29.745	23.862	74.51	43.781	34.29
	49.399	32.071	47.49	42.709	65.98
	18.435	64.028	79.546	35.538	62.99
	53.973	86.228	59.278	23.131	18.05
	78.089	25.723	38.605	38.811	20.53
	66.153	7.332	63.019	11.143	38.59
	47.49	54.145	24.227	45.196	60.62
	80.538	36.954	49.984	77.471	2.75
	56.104	69.989	48.998	16.96	33.41
	53.13	78.816	16.175	87.743	55.95
	45	20.109	1.026	60.513	14.99
	70.346	50.373	24.341	69.075	12.42
	88.122	32.804	59.775	33.69	80.48
	25.346	9.814	52.392	41.878	15.03
	27.897	8.393	29.635	75.145	8.74
	60.945	79.33	38.651	60.499	41.2
	36.027	19.851	85.684	3.122	49.04
	81.87	49.995	43.112	90	10.41
	67.218	75.279	15.767	14.036	74.3
	39.065	31.949	41.223	53.13	54.98
	85.601	46.014	32.421	41.717	62.57
	30.901	76.368	68.736	0	21.43
	36.18	53.471	52.181	31.515	9.95
	35.362	70.492	79.386	20.556	36.11
	4.399	78.242	62.928	27.597	29.56
	42.274	13.325	84.289	51.938	26.28
	56.205	31.686	8.854	49.248	48.81
	38.29	18.175	52.181	62.488	48.93
	66.64	51.17	54.368	42.51	84.47
	46.042	55.305	1.236	21.775	22.36
	66.501	24.52	24.166	87.532	65.48
	69.228	76.9	44.319	87.127	28.85
	75.486	3.097	35.938	70.665	7.31
	24.934	7.127	41.194	42.274	44.25
	62.892	27.744	5.281	57.009	70.23
	8.13	30.7	56.74	40.601	32.89
	31.43	20.165	55.721	62.592	70.41
	76.088	31.028	11.019	28.393	45.62
	35.407	42.263	49.439	40.892	70.29
	10.784	90	31.504	54.593	2.94
	36.973	53.427	33.246	48.778	42.22
	79.38	12.048	57.672	45	8.85
	35.134	64.467	53.881	50.997	10.83
	79.38	14.83	24.799	58.369
	26.565	46.332	31.759	59.036
	26.398	45.062	11.592	43.152
	42.603	23.269		41.328
	41.987	40.914		85.574
	28.828	43.966		45.118
		33.469		41.724
		49.221		24.787
		35.523		9.775
		26.236		32.455
		62.354		14.515
		68.334		8.227
		84.537		3.835
		76.293		62.791
		75.129		30.137
		83.66		57.995
		38.682		78.611
		66.851		30.305
		51.042		14.087
		16.991		24.379
		84.49		78.69
		30.415		3.292
		39.842		65.102
		73.435		38.621
		34.051		54.88
		61.446		1.894
		39.509		88.756
		31.686		2.515
		6.34		20.499
		36.587		51.201
		83.397		77.546
		58.744		13.149
		39.748		16.691
		35.676		68.033
		66.389		60.562
		4.668		2.402
		53.932		29.148
		13.985		8.025
		77.013		9.206
		57.409		83.681
		69.004		55.192
		44.086		79.579
		57.995		44.086
		6.953		33.204
		6.467		83.175
		71.565		12.426
		39.934		83.267
		83.326		83.956
		63.435		42.921
		26.355		52.669
		53.13		46.342
				19.804
				24.217
				3.652
				48.049
				54.708
				46.029
				45.372
				32.767
				36.332
				87.907
				40.018
				51.26
				22.957
				33.199
				8.261
				34.725
				3.385
				46.096
				45
				42.81
				24.806
				38.811
				29.86
				51.329
				46.696
				67.735
				13.883
				40.445
				18.435
				65.266
				53.489
				5.075
				57.405
				84.586
				74.745
				46.216
				13.408
				69.575
				27.323
				5.194
				27.199
				64.767
				65.556
				64.68
				32.386
				90
				7.765
				40.58
Count	102	147	99	195	96
Panel B
	DMSO	NBQX		DMSO					Counts				Expected randomised distribution				Chi squared
	76.43	36.993		vs.			Cell line	clone	0-30	30-60	60-90	total	expected 0-30	expected 30-60	expected 60-90	total	0-30	30-60	60-90	Sum	p-value (2 df)	Stars
	49.764	62.201		NBQX			DMSO		9	24	58	91	30.3333	30.3333	30.3333	91	15.0037	1.32234	25.2344	41.5604	<0.001	***
	32.183	47.622					NBQX		33	43	19	95	31.6667	31.6667	31.6667	95	0.05614	4.05614	5.06667	9.17895	0.02-0.01	*
	35.422	31.303		Kolmogorov-Smirnov test
	5.906	34.875		P value	<0.0001
	89.415	41.203		Exact or approximate P value?	Approximate
	70.56	1.202		P value summary	****
	85.244	81.112		Significantly different (P < 0.05)?	Yes
	16.113	13.861		Kolmogorov-Smirnov D	0.4781
	44.556	34.21
	76.895	30.675
	43.264	6.226
	78.933	19.075
	73.066	6.882
	80.621	80.215
	88.785	83.606
	80.054	11.205
	35.776	62.776
	78.063	10.342
	62.584	21.18
	73.223	71.172
	70.206	51.34
	22.286	49.691
	10.222	64.124
	64.904	22.122
	79.002	70.316
	82.109	41.801
	50.194	52.292
	90	4.97
	49.644	53.779
	79.81	46.685
	76.71	7.94
	58.67	63.562
	25.59	31.07
	75.18	21.66
	89.17	11.79
	78.32	26.42
	49.14	58.24
	81.81	16.43
	75.99	45
	42.45	31.27
	47.62	54.76
	76.06	37.6
	22.93	27.47
	79.33	9.58
	88.21	56.9
	82.31	34.38
	82.31	3.9
	81.2	25.18
	62.69	1.27
	72.25	48.89
	44.54	62.09
	73.43	50.94
	71.86	41.05
	80.95	79.56
	49.12	33.43
	71.9	38.63
	74.47	12.57
	75.63	66.18
	86.87	71.45
	83.42	29.77
	44.5	30.17
	57.58	50.78
	87.52	56.22
	58.53	41.61
	80.05	58.23
	12.33	46.02
	68.03	9.02
	71.19	62.36
	62.35	33.6
	38.94	86.36
	86.06	35.87
	63.98	18.41
	69.71	20.28
	42.59	51.95
	43.61	63.48
	89.93	61.44
	86.41	28.39
	57.46	23.38
	18.95	80.37
	67.31	59.07
	71.18	6.7
	89.69	31.87
	84.14	55.03
	25.76	58.77
	88.79	33.2
	48.2	27.43
	63.91	16.28
	32.82	26.05
	79.27	40.76
	47.42	28.06
		39.07
		74.12
		54.27
		4.98
Count	91	95
Panel C
Nanog ACD	WT + Wnt3a-beads (repeated from Fig. 9)									GriK1/3dKO (#1)				GriK1/3dKO (#2)				GriA3/4dKO (#1)				GriA3/4dKO (#1)				CNQX					Two-way ANOVA	Ordinary						Number of families	3
Prox (#)	8	16	10	18	20	16	19	21	19	17	17	19	11	14	17	18	14	5	11	10	7	5	10	6	5	3	8	8			Alpha	0.05						Number of comparisons per family	5
Distributed (#)	5	8	10	13	6	7	5	8	6	10	6	9	10	10	6	9	13	15	8	14	11	15	11	10	14	9	6	11										Alpha	0.05
Distal (#)	5	3	4	15	6	7	9	2	5	6	8	2	9	7	7	4	3	10	12	6	11	10	9	14	12	10	10	6			Source of Variation	% of total variation	P value	P value summary	Significant?
Total doublets (#)	18	27	24	46	32	30	33	31	30	33	31	30	30	31	30	31	30	30	31	30	29	30	30	30	31	22	24	25			Interaction	47.7	<0.0001	****	Yes			Dunnett's multiple comparisons test	Predicted (LS) mean diff.	95.00% CI of diff.	Below threshold?	Summary	Adjusted P Value		Test details	Predicted (LS) mean 1	Predicted (LS) mean 2	Predicted (LS) mean diff.	SE of diff.
Proximal	44.4444	59.2593	41.6667	39.1304	62.5	53.3333	57.5758	67.7419	63.3333	51.5152	54.8387	63.3333	36.6667	45.1613	56.6667	58.0645	46.6667	16.6667	35.4839	33.3333	24.1379	16.6667	33.3333	20	16.129	13.6364	33.3333	32			Row Factor	9.475	0.0001	***	Yes
Distributed	27.7778	29.6296	41.6667	28.2609	18.75	23.3333	15.1515	25.8065	20	30.303	19.3548	30	33.3333	32.2581	20	29.0323	43.3333	50	25.8065	46.6667	37.931	50	36.6667	33.3333	45.1613	40.9091	25	44			Column Factor	1.298e-13	>0.9999	ns	No			Proximal							Proximal
Distal	27.7778	11.1111	16.6667	32.6087	18.75	23.3333	27.2727	6.45161	16.6667	18.1818	25.8065	6.66667	30	22.5806	23.3333	12.9032	10	33.3333	38.7097	20	37.931	33.3333	30	46.6667	38.7097	45.4545	41.6667	24										WT (Wnt3a) vs. CNQX	28.01	12.37 to 43.65	Yes	****	<0.0001		WT (Wnt3a) vs. CNQX	54.33	26.32	28.01	5.969
																															ANOVA table	SS (Type III)	DF	MS	F (DFn, DFd)	P value		WT (Wnt3a) vs. GriK1/3dKO (#1)	2.743	-11.35 to 16.84	No	ns	0.9878		WT (Wnt3a) vs. GriK1/3dKO (#1)	54.33	51.59	2.743	5.38
																															Interaction	8265	10	826.5	F (10, 66) = 10.31	P<0.0001		WT (Wnt3a) vs. GriK1/3dKO (#2)	2.692	-11.41 to 16.79	No	ns	0.9888		WT (Wnt3a) vs. GriK1/3dKO (#2)	54.33	51.64	2.692	5.38
																															Row Factor	1642	2	820.9	F (2, 66) = 10.24	P=0.0001		WT (Wnt3a) vs. GriA34dKO (#1)	26.93	12.83 to 41.02	Yes	****	<0.0001		WT (Wnt3a) vs. GriA34dKO (#1)	54.33	27.41	26.93	5.38
																															Column Factor	2.249e-11	5	4.497e-12	F (5, 66) = 5.610e-014	P>0.9999		WT (Wnt3a) vs. GriA34/4dKO (#2)	32.8	18.70 to 46.90	Yes	****	<0.0001		WT (Wnt3a) vs. GriA34/4dKO (#2)	54.33	21.53	32.8	5.38
																															Residual	5291	66	80.16
																																						Distributed							Distributed
																															Data summary							WT (Wnt3a) vs. CNQX	-11.04	-26.68 to 4.600	No	ns	0.2734		WT (Wnt3a) vs. CNQX	25.6	36.64	-11.04	5.969
																															Number of columns (Column Factor)	6						WT (Wnt3a) vs. GriK1/3dKO (#1)	-2.65	-16.75 to 11.45	No	ns	0.9896		WT (Wnt3a) vs. GriK1/3dKO (#1)	25.6	28.25	-2.65	5.38
																															Number of rows (Row Factor)	3						WT (Wnt3a) vs. GriK1/3dKO (#2)	-5.559	-19.66 to 8.539	No	ns	0.8045		WT (Wnt3a) vs. GriK1/3dKO (#2)	25.6	31.16	-5.559	5.38
																															Number of values	84						WT (Wnt3a) vs. GriA34dKO (#1)	-14.5	-28.60 to -0.4065	Yes	*	0.0411		WT (Wnt3a) vs. GriA34dKO (#1)	25.6	40.1	-14.5	5.38
																																						WT (Wnt3a) vs. GriA34/4dKO (#2)	-15.69	-29.79 to -1.596	Yes	*	0.0228		WT (Wnt3a) vs. GriA34/4dKO (#2)	25.6	41.29	-15.69	5.38
																																						Distal							Distal
																																						WT (Wnt3a) vs. CNQX	-16.97	-32.61 to -1.330	Yes	*	0.0279		WT (Wnt3a) vs. CNQX	20.07	37.04	-16.97	5.969
																																						WT (Wnt3a) vs. GriK1/3dKO (#1)	-0.09278	-14.19 to 14.00	No	ns	>0.9999		WT (Wnt3a) vs. GriK1/3dKO (#1)	20.07	20.16	-0.09278	5.38
																																						WT (Wnt3a) vs. GriK1/3dKO (#2)	2.867	-11.23 to 16.96	No	ns	0.9852		WT (Wnt3a) vs. GriK1/3dKO (#2)	20.07	17.2	2.867	5.38
																																						WT (Wnt3a) vs. GriA34dKO (#1)	-12.42	-26.52 to 1.675	No	ns	0.1059		WT (Wnt3a) vs. GriA34dKO (#1)	20.07	32.49	-12.42	5.38
																																						WT (Wnt3a) vs. GriA34/4dKO (#2)	-17.11	-31.20 to -3.009	Yes	*	0.0108		WT (Wnt3a) vs. GriA34/4dKO (#2)	20.07	37.18	-17.11	5.38
Panel D
Rex1 ACD	WT + Wnt3a-beads (repeaetd from Fig. 9)											GriK1/3dKO (#1)				GriK1/3dKO (#2)				GriA3/4dKO (#1)				GriA3/4dKO (#2)				CNQX				Two-way ANOVA	Ordinary						Number of families	3
Prox (#)	15	12	12	11	12	11	13	15	19	23	20	12	16	13	13	9	16	14	15	5	8	5	6	4	10	10	11	6	7	7		Alpha	0.05						Number of comparisons per family	5
Distributed (#)	9	9	10	5	7	6	15	11	10	7	4	16	7	14	13	18	7	13	10	16	14	22	17	19	15	13	15	10	10	5									Alpha	0.05
Distal (#)	2	5	2	2	3	5	4	4	4	1	5	5	8	3	4	4	7	4	5	8	9	3	8	7	5	7	5	7	6	8		Source of Variation	% of total variation	P value	P value summary	Significant?
Total doublets (#)	26	26	24	18	22	22	32	30	33	31	29	33	31	30	30	31	30	31	30	29	31	30	31	30	30	30	31	23	23	20		Interaction	34.83	<0.0001	****	Yes			Dunnett's multiple comparisons test	Predicted (LS) mean diff.	95.00% CI of diff.	Below threshold?	Summary	Adjusted P Value		Test details	Predicted (LS) mean 1	Predicted (LS) mean 2	Predicted (LS) mean diff.
Proximal	57.6923	46.1538	50	61.1111	54.5455	50	40.625	50	57.5758	74.1935	68.9655	36.3636	51.6129	43.3333	43.3333	29.0323	53.3333	45.1613	50	17.2414	25.8065	16.6667	19.3548	13.3333	33.3333	33.3333	35.4839	26.087	30.4348	35		Row Factor	28.55	<0.0001	****	Yes
Distributed	34.6154	34.6154	41.6667	27.7778	31.8182	27.2727	46.875	36.6667	30.303	22.5806	13.7931	48.4848	22.5806	46.6667	43.3333	58.0645	23.3333	41.9355	33.3333	55.1724	45.1613	73.3333	54.8387	63.3333	50	43.3333	48.3871	43.4783	43.4783	25		Column Factor	1.121e-13	>0.9999	ns	No			Proximal							Proximal
Distal	7.69231	19.2308	8.33333	11.1111	13.6364	22.7273	12.5	13.3333	12.1212	3.22581	17.2414	15.1515	25.8065	10	13.3333	12.9032	23.3333	12.9032	16.6667	27.5862	29.0323	10	25.8065	23.3333	16.6667	23.3333	16.129	30.4348	26.087	40									WT (Wnt3a) vs. CNQX	25.03	10.11 to 39.94	Yes	***	0.0002		WT (Wnt3a) vs. CNQX	55.53	30.51	25.03
																																ANOVA table	SS (Type III)	DF	MS	F (DFn, DFd)	P value		WT (Wnt3a) vs. GriK1/3dKO (#1)	11.87	-1.501 to 25.25	No	ns	0.1027		WT (Wnt3a) vs. GriK1/3dKO (#1)	55.53	43.66	11.87
																																Interaction	8617	10	861.7	F (10, 72) = 11.27	P<0.0001		WT (Wnt3a) vs. GriK1/3dKO (#2)	11.15	-2.222 to 24.52	No	ns	0.1412		WT (Wnt3a) vs. GriK1/3dKO (#2)	55.53	44.38	11.15
																																Row Factor	7063	2	3532	F (2, 72) = 46.19	P<0.0001		WT (Wnt3a) vs. GriA34dKO (#1)	35.77	22.39 to 49.14	Yes	****	<0.0001		WT (Wnt3a) vs. GriA34dKO (#1)	55.53	19.77	35.77
																																Column Factor	2.773e-11	5	5.546e-12	F (5, 72) = 7.253e-014	P>0.9999		WT (Wnt3a) vs. GriA34/4dKO (#2)	26.66	13.29 to 40.04	Yes	****	<0.0001		WT (Wnt3a) vs. GriA34/4dKO (#2)	55.53	28.87	26.66
																																Residual	5505	72	76.46
																																							Distributed							Distributed
																																Data summary							WT (Wnt3a) vs. CNQX	-5.684	-20.60 to 9.234	No	ns	0.8317		WT (Wnt3a) vs. CNQX	31.63	37.32	-5.684
																																Number of columns (Column Factor)	6						WT (Wnt3a) vs. GriK1/3dKO (#1)	-8.631	-22.00 to 4.742	No	ns	0.3665		WT (Wnt3a) vs. GriK1/3dKO (#1)	31.63	40.27	-8.631
																																Number of rows (Row Factor)	3						WT (Wnt3a) vs. GriK1/3dKO (#2)	-7.532	-20.90 to 5.841	No	ns	0.5083		WT (Wnt3a) vs. GriK1/3dKO (#2)	31.63	39.17	-7.532
																																Number of values	90						WT (Wnt3a) vs. GriA34dKO (#1)	-25.49	-38.86 to -12.12	Yes	****	<0.0001		WT (Wnt3a) vs. GriA34dKO (#1)	31.63	57.13	-25.49
																																							WT (Wnt3a) vs. GriA34/4dKO (#2)	-19.63	-33.00 to -6.255	Yes	**	0.0013		WT (Wnt3a) vs. GriA34/4dKO (#2)	31.63	51.26	-19.63
																																							Distal							Distal
																																							WT (Wnt3a) vs. CNQX	-19.34	-34.26 to -4.424	Yes	**	0.0055		WT (Wnt3a) vs. CNQX	12.83	32.17	-19.34
																																							WT (Wnt3a) vs. GriK1/3dKO (#1)	-3.241	-16.61 to 10.13	No	ns	0.9703		WT (Wnt3a) vs. GriK1/3dKO (#1)	12.83	16.07	-3.241
																																							WT (Wnt3a) vs. GriK1/3dKO (#2)	-3.62	-16.99 to 9.754	No	ns	0.9529		WT (Wnt3a) vs. GriK1/3dKO (#2)	12.83	16.45	-3.62
																																							WT (Wnt3a) vs. GriA34dKO (#1)	-10.27	-23.65 to 3.099	No	ns	0.2027		WT (Wnt3a) vs. GriA34dKO (#1)	12.83	23.11	-10.27
																																							WT (Wnt3a) vs. GriA34/4dKO (#2)	-7.034	-20.41 to 6.340	No	ns	0.5776		WT (Wnt3a) vs. GriA34/4dKO (#2)	12.83	19.87	-7.034
Panel E
Sox2 ACD	WT + Wnt3a-beads (repeated from Fig.9)					GriK1/3dKO (#1)				GriK1/3dKO (#2)				GriA3/4dKO (#1)				GriA3/4dKO (#2)					Two-way ANOVA	Ordinary						Number of families	3
Prox (#)	20	15	18	25	22	16	16	17	11	12	17	16	15	8	10	10	11	4	6	11	8		Alpha	0.05						Number of comparisons per family	4
Distributed (#)	8	8	7	4	3	11	6	11	13	13	6	10	10	11	8	13	8	15	12	10	13									Alpha	0.05
Distal (#)	4	7	8	2	5	6	9	2	6	6	7	5	5	11	13	7	11	11	12	9	10		Source of Variation	% of total variation	P value	P value summary	Significant?
Total doublets (#)	32	30	33	31	30	33	31	30	30	31	30	31	30	30	31	30	30	30	30	30	31		Interaction	47.34	<0.0001	****	Yes			Dunnett's multiple comparisons test	Predicted (LS) mean diff.	95.00% CI of diff.	Below threshold?	Summary	Adjusted P Value		Test details	Predicted (LS) mean 1	Predicted (LS) mean 2	Predicted (LS) mean diff.	SE of diff.	N1	N2	q	DF
Proximal	62.5	50	54.5455	80.6452	73.3333	48.4848	51.6129	56.6667	36.6667	38.7097	56.6667	51.6129	50	26.6667	32.2581	33.3333	36.6667	13.3333	20	36.6667	25.8065		Row Factor	25.93	<0.0001	****	Yes
Distributed	25	26.6667	21.2121	12.9032	10	33.3333	19.3548	36.6667	43.3333	41.9355	20	32.2581	33.3333	36.6667	25.8065	43.3333	26.6667	50	40	33.3333	41.9355		Column Factor	1.202e-13	>0.9999	ns	No			Proximal							Proximal
Distal	12.5	23.3333	24.2424	6.45161	16.6667	18.1818	29.0323	6.66667	20	19.3548	23.3333	16.129	16.6667	36.6667	41.9355	23.3333	36.6667	36.6667	40	30	32.2581									WT (Wnt3a) vs. GriK1/3dKO (#1)	15.85	1.798 to 29.90	Yes	*	0.0223		WT (Wnt3a) vs. GriK1/3dKO (#1)	64.2	48.36	15.85	5.533	5	4	2.864	48
																							ANOVA table	SS (Type III)	DF	MS	F (DFn, DFd)	P value		WT (Wnt3a) vs. GriK1/3dKO (#2)	14.96	0.9081 to 29.01	Yes	*	0.0335		WT (Wnt3a) vs. GriK1/3dKO (#2)	64.2	49.25	14.96	5.533	5	4	2.703	48
																							Interaction	6960	8	870	F (8, 48) = 12.79	P<0.0001		WT (Wnt3a) vs. GriA34dKO (#1)	31.97	17.92 to 46.02	Yes	****	<0.0001		WT (Wnt3a) vs. GriA34dKO (#1)	64.2	32.23	31.97	5.533	5	4	5.778	48
																							Row Factor	3812	2	1906	F (2, 48) = 28.01	P<0.0001		WT (Wnt3a) vs. GriA34/4dKO (#2)	40.25	26.20 to 54.30	Yes	****	<0.0001		WT (Wnt3a) vs. GriA34/4dKO (#2)	64.2	23.95	40.25	5.533	5	4	7.274	48
																							Column Factor	1.767e-11	4	4.417e-12	F (4, 48) = 6.491e-014	P>0.9999
																							Residual	3266	48	68.04				Distributed							Distributed
																														WT (Wnt3a) vs. GriK1/3dKO (#1)	-14.02	-28.06 to 0.03369	No	ns	0.0507		WT (Wnt3a) vs. GriK1/3dKO (#1)	19.16	33.17	-14.02	5.533	5	4	2.533	48
																							Data summary							WT (Wnt3a) vs. GriK1/3dKO (#2)	-12.73	-26.77 to 1.324	No	ns	0.0867		WT (Wnt3a) vs. GriK1/3dKO (#2)	19.16	31.88	-12.73	5.533	5	4	2.3	48
																							Number of columns (Column Factor)	5						WT (Wnt3a) vs. GriA34dKO (#1)	-13.96	-28.01 to 0.08745	No	ns	0.0519		WT (Wnt3a) vs. GriA34dKO (#1)	19.16	33.12	-13.96	5.533	5	4	2.523	48
																							Number of rows (Row Factor)	3						WT (Wnt3a) vs. GriA34/4dKO (#2)	-22.16	-36.21 to -8.111	Yes	***	0.0008		WT (Wnt3a) vs. GriA34/4dKO (#2)	19.16	41.32	-22.16	5.533	5	4	4.005	48
																							Number of values	63
																														Distal							Distal
																														WT (Wnt3a) vs. GriK1/3dKO (#1)	-1.831	-15.88 to 12.22	No	ns	0.9929		WT (Wnt3a) vs. GriK1/3dKO (#1)	16.64	18.47	-1.831	5.533	5	4	0.331	48
																														WT (Wnt3a) vs. GriK1/3dKO (#2)	-2.232	-16.28 to 11.82	No	ns	0.985		WT (Wnt3a) vs. GriK1/3dKO (#2)	16.64	18.87	-2.232	5.533	5	4	0.4034	48
																														WT (Wnt3a) vs. GriA34dKO (#1)	-18.01	-32.06 to -3.962	Yes	**	0.0077		WT (Wnt3a) vs. GriA34dKO (#1)	16.64	34.65	-18.01	5.533	5	4	3.255	48
																														WT (Wnt3a) vs. GriA34/4dKO (#2)	-18.09	-32.14 to -4.043	Yes	**	0.0074		WT (Wnt3a) vs. GriA34/4dKO (#2)	16.64	34.73	-18.09	5.533	5	4	3.27	48
Panel F
Nanog ACD	DMSO				NBQX					Two-way ANOVA	Ordinary						Number of families	1
Prox (#)	20	17	16	19	12	9	8	6		Alpha	0.05						Number of comparisons per family	3
Distributed (#)	7	10	7	8	14	13	6	14									Alpha	0.05
Distal (#)	3	3	7	3	4	8	16	10		Source of Variation	% of total variation	P value	P value summary	Significant?
Total doublets (#)	30	30	30	30	30	30	30	30		Interaction	43.15	0.0002	***	Yes			Šídák's multiple comparisons test	Mean Diff.	95.00% CI of diff.	Below threshold?	Summary	Adjusted P Value
Proximal	66.6667	56.6667	53.3333	63.3333	40	30	26.6667	20		Row Factor	29.19	0.0015	**	Yes
Distributed	23.3333	33.3333	23.3333	26.6667	46.6667	43.3333	20	46.6667		Column Factor	6.229e-14	>0.9999	ns	No			DMSO - NBQX
Distal	10	10	23.3333	10	13.3333	26.6667	53.3333	33.3333									Proximal	30.83	11.97 to 49.69	Yes	**	0.0013
										ANOVA table	SS	DF	MS	F (DFn, DFd)	P value		Distributed	-12.5	-31.36 to 6.361	No	ns	0.2668
										Interaction	2886	2	1443	F (2, 18) = 14.04	P=0.0002		Distal	-18.33	-37.19 to 0.5279	No	ns	0.0582
										Row Factor	1953	2	976.4	F (2, 18) = 9.500	P=0.0015
										Column Factor	4.167e-12	1	4.167e-12	F (1, 18) = 4.054e-014	P>0.9999
										Residual	1850	18	102.8				Test details	Mean 1	Mean 2	Mean Diff.	SE of diff.	N1	N2	t	DF
										Difference between column means							DMSO - NBQX
										Mean of DMSO	33.33						Proximal	60	29.17	30.83	7.169	4	4	4.301	18
										Mean of NBQX	33.33						Distributed	26.67	39.17	-12.5	7.169	4	4	1.744	18
										Difference between means	-8.333e-07						Distal	13.33	31.67	-18.33	7.169	4	4	2.557	18
										SE of difference	4.139
										95% CI of difference	-8.695 to 8.695
Panel G
Rex1 ACD	DMSO				NBQX					Two-way ANOVA	Ordinary						Number of families	1
Prox (#)	20	18	16	19	11	12	8	6		Alpha	0.05						Number of comparisons per family	3
Distributed (#)	7	9	11	9	16	12	11	17									Alpha	0.05
Distal (#)	3	3	3	2	3	6	11	7		Source of Variation	% of total variation	P value	P value summary	Significant?
Total doublets (#)	30	30	30	30	30	30	30	30		Interaction	35.16	<0.0001	****	Yes			Šídák's multiple comparisons test	Mean Diff.	95.00% CI of diff.	Below threshold?	Summary	Adjusted P Value
Proximal	66.6667	60	53.3333	63.3333	36.6667	40	26.6667	20		Row Factor	50.58	<0.0001	****	Yes
Distributed	23.3333	30	36.6667	30	53.3333	40	36.6667	56.6667		Column Factor	9.132e-14	>0.9999	ns	No			DMSO - NBQX
Distal	10	10	10	6.66667	10	20	36.6667	23.3333									Proximal	30	15.46 to 44.54	Yes	***	0.0001
										ANOVA table	SS	DF	MS	F (DFn, DFd)	P value		Distributed	-16.67	-31.21 to -2.123	Yes	*	0.0221
										Interaction	2711	2	1356	F (2, 18) = 22.18	P<0.0001		Distal	-13.33	-27.88 to 1.211	No	ns	0.0781
										Row Factor	3900	2	1950	F (2, 18) = 31.91	P<0.0001
										Column Factor	7.042e-12	1	7.042e-12	F (1, 18) = 1.152e-013	P>0.9999
										Residual	1100	18	61.11				Test details	Mean 1	Mean 2	Mean Diff.	SE of diff.	N1	N2	t	DF
										Difference between column means							DMSO - NBQX
										Mean of DMSO	33.33						Proximal	60.83	30.83	30	5.528	4	4	5.427	18
										Mean of NBQX	33.33						Distributed	30	46.67	-16.67	5.528	4	4	3.015	18
										Difference between means	-1.083e-06						Distal	9.167	22.5	-13.33	5.528	4	4	2.412	18
										SE of difference	3.191
										95% CI of difference	-6.705 to 6.705
										Data summary
										Number of columns (Column Factor)	2
										Number of rows (Row Factor)	3
										Number of values	24
Panel H
Sox2 ACD	DMSO				NBQX					Two-way ANOVA	Ordinary						Number of families	1
Prox (#)	21	18	15	19	11	10	8	6		Alpha	0.05						Number of comparisons per family	3
Distributed (#)	6	9	9	8	15	12	6	15									Alpha	0.05
Distal (#)	3	3	6	3	4	8	16	9		Source of Variation	% of total variation	P value	P value summary	Significant?
Total doublets (#)	30	30	30	30	30	30	30	30		Interaction	42.39	0.0002	***	Yes			Šídák's multiple comparisons test	Mean Diff.	95.00% CI of diff.	Below threshold?	Summary	Adjusted P Value
Proximal	70	60	50	63.3333	36.6667	33.3333	26.6667	20		Row Factor	30.43	0.0012	**	Yes
Distributed	20	30	30	26.6667	50	40	20	50		Column Factor	0	>0.9999	ns	No			DMSO - NBQX
Distal	10	10	20	10	13.3333	26.6667	53.3333	30									Proximal	31.67	12.33 to 51.00	Yes	**	0.0013
										ANOVA table	SS	DF	MS	F (DFn, DFd)	P value		Distributed	-13.33	-32.67 to 6.003	No	ns	0.2373
										Interaction	3033	2	1517	F (2, 18) = 14.04	P=0.0002		Distal	-18.33	-37.67 to 1.003	No	ns	0.0662
										Row Factor	2178	2	1089	F (2, 18) = 10.08	P=0.0012
										Column Factor	0	1	0	F (1, 18) = 0.000	P>0.9999
										Residual	1944	18	108				Test details	Mean 1	Mean 2	Mean Diff.	SE of diff.	N1	N2	t	DF
										Difference between column means							DMSO - NBQX
										Mean of DMSO	33.33						Proximal	60.83	29.17	31.67	7.349	4	4	4.309	18
										Mean of NBQX	33.33						Distributed	26.67	40	-13.33	7.349	4	4	1.814	18
										Difference between means	0						Distal	12.5	30.83	-18.33	7.349	4	4	2.495	18
										SE of difference	4.243
										95% CI of difference	-8.914 to 8.914
										Data summary
										Number of columns (Column Factor)	2
										Number of rows (Row Factor)	3
										Number of values	24
[truncated: 5 more columns]
